# Supplementary material for: Changes in the rates of weight and waist circumference gain in Australian adults over time: a longitudinal cohort study
Source: PubMed Central journal article supplement — BMJ Open. 2014 Jan 16;4(1):e003667. doi: 10.1136/bmjopen-2013-003667 (PMC3902308; doi:10.1136/bmjopen-2013-003667), 2014-01-16
Supplement: bmjopen-2013-003667.draft_revisions.pdf [file bmjopen-2013-003667.draft_revisions.pdf]

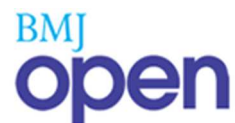

## Changes in the rates of weight and waist circumference gain in Australian adults over time

|                                 |                                                                                                                                                                                                                                                                                                                                                                                                                 |
|---------------------------------|-----------------------------------------------------------------------------------------------------------------------------------------------------------------------------------------------------------------------------------------------------------------------------------------------------------------------------------------------------------------------------------------------------------------|
| Journal:                        | <i>BMJ Open</i>                                                                                                                                                                                                                                                                                                                                                                                                 |
| Manuscript ID:                  | bmjopen-2013-003667                                                                                                                                                                                                                                                                                                                                                                                             |
| Article Type:                   | Research                                                                                                                                                                                                                                                                                                                                                                                                        |
| Date Submitted by the Author:   | 29-Jul-2013                                                                                                                                                                                                                                                                                                                                                                                                     |
| Complete List of Authors:       | Peeters, Anna; Baker IDI Heart and Diabetes Institute, Obesity and Population Health; Baker IDI Heart and Diabetes Institute, Clinical Diabetes and Epidemiology<br>Magliano, Diana; Baker IDI Heart and Diabetes Institute,<br>Backholer, Kathryn; Baker IDI Heart and Diabetes Institute,<br>Zimmet, Paul; Baker IDI Heart and Diabetes Institute,<br>Shaw, Jonathan; Baker IDI Heart and Diabetes Institute, |
| <b>Primary Subject Heading</b>: | Public health                                                                                                                                                                                                                                                                                                                                                                                                   |
| Secondary Subject Heading:      | Epidemiology, Diabetes and endocrinology                                                                                                                                                                                                                                                                                                                                                                        |
| Keywords:                       | obesity, trends, cohort                                                                                                                                                                                                                                                                                                                                                                                         |
|                                 |                                                                                                                                                                                                                                                                                                                                                                                                                 |

SCHOLARONE™  
Manuscripts

1  
2  
3 1 Changes in the rates of weight and waist circumference gain in Australian adults over time.  
4  
5  
6  
7  
8  
9  
10  
11  
12  
13  
14  
15  
16  
17  
18  
19  
20  
21  
22  
23  
24  
25  
26  
27  
28  
29  
30  
31  
32  
33  
34  
35  
36  
37  
38  
39  
40  
41  
42  
43  
44  
45  
46  
47  
48  
49  
50  
51  
52  
53  
54  
55  
56  
57  
58  
59  
60

2

3 Anna Peeters (Head, Obesity and Population Health)<sup>1</sup>, Dianna J Magliano (Head, Diabetes  
4 and Population Health)<sup>1</sup>, Kathryn Backholer (Research Fellow)<sup>1</sup>, Paul Zimmet (Emeritus  
5 Director)<sup>1</sup>, Jonathan E Shaw (Director, Clinical Epidemiology and Diabetes)<sup>1</sup>

6 1 Baker IDI Heart and Diabetes Institute, Melbourne 3004, Victoria, Australia

7

8 Running title: Change in weight and waist gain over time

9

10 Corresponding author:

11 Anna Peeters

12 Obesity and Population Health

13 Baker IDI Heart and Diabetes Institute

14 Commercial Rd

15 Melbourne 3004

16 Australia

17 Phone: +61 3 8532 1928

18 Email: [anna.peeters@bakeridi.edu.au](mailto:anna.peeters@bakeridi.edu.au)

19

1  
2  
3 20 *Data sharing*  
4  
5

6 21 Extra data is available by emailing A Peeters at [anna.peeters@bakeridi.edu.au](mailto:anna.peeters@bakeridi.edu.au)  
7  
8  
9 22

10  
11  
12 23 *Authorship statement*  
13  
14

15 24 AP conceived of the article, executed the analysis and writing of the article and is guarantor  
16  
17 25 for the article. JS, DM and KB contributed to the ideas included within and writing of the  
18  
19 26 article, and provision of data. PZ contributed to the writing of the article and provision of  
20  
21 27 data.  
22  
23  
24  
25  
26  
27  
28

29 29 *Funding*  
30

31 30 This work was supported by VicHealth (Fellowship, AP), the Australian National Preventive  
32  
33 31 Health Agency (Project grant) and Australia Research Council (ARC-linkage grant  
34  
35 32 LP12010041). J.E.S. is supported by a National Health and Medical Research Council  
36  
37 33 Fellowship (586623).  
38

39 34 The AusDiab study, co-coordinated by the Baker IDI Heart and Diabetes Institute, was  
40  
41 35 supported in part by the Victorian Government's OIS Program, and gratefully acknowledges  
42  
43 36 the generous support given by: National Health and Medical Research Council (NHMRC  
44  
45 37 grant 233200), Australian Government Department of Health and Ageing. Abbott Australasia  
46  
47 38 Pty Ltd, Alphapharm Pty Ltd, AstraZeneca, Bristol-Myers Squibb, City Health Centre-  
48  
49 39 Diabetes Service-Canberra, Department of Health and Community Services - Northern  
50  
51 40 Territory, Department of Health and Human Services – Tasmania, Department of Health –  
52  
53 41 New South Wales, Department of Health – Western Australia, Department of Health – South  
54  
55 42 Australia, Department of Human Services – Victoria, Diabetes Australia, Diabetes Australia  
56  
57  
58  
59  
60

- 1
- 2
- 3 43 Northern Territory, Eli Lilly Australia, Estate of the Late Edward Wilson, GlaxoSmithKline,
- 4
- 5 44 Jack Brockhoff Foundation, Janssen-Cilag, Kidney Health Australia, Marian & FH Flack
- 6
- 7 45 Trust, Menzies Research Institute, Merck Sharp & Dohme, Novartis Pharmaceuticals, Novo
- 8
- 9 46 Nordisk Pharmaceuticals, Pfizer Pty Ltd, Pratt Foundation, Queensland Health, Roche
- 10
- 11 47 Diagnostics Australia, Royal Prince Alfred Hospital, Sydney, Sanofi Aventis, Sanofi
- 12
- 13 48 Synthelabo.
- 14
- 15
- 16
- 17
- 18
- 19
- 20
- 21
- 22
- 23
- 24
- 25
- 26
- 27
- 28
- 29
- 30
- 31
- 32
- 33
- 34
- 35
- 36
- 37
- 38
- 39
- 40
- 41
- 42
- 43
- 44
- 45
- 46
- 47
- 48
- 49
- 50
- 51
- 52
- 53
- 54
- 55
- 56
- 57
- 58
- 59
- 60

For peer review only

1  
2  
3 49 *Article summary*  
4  
5

6 50 *Article focus*  
7  
8

- 9 • We aimed to assess for the first time in a single cohort whether annual change in  
10 weight and waist circumference has changed in recent time periods.  
11  
12

13  
14 53 *Key messages*  
15  
16

- 17 • Between 2004/5–2011/2, Australian adults in this national cohort study continued to  
18 gain weight, but more slowly than 1999/2000–2004/5.  
19  
20

- 21 • In contrast waist circumference gain was greater in the most recent period. Important  
22 differences were observed according to area-level disadvantage.  
23  
24

- 25 • While some obesity prevention strategies may be working, they do not appear to be  
26 affecting those in more disadvantaged areas.  
27  
28

29  
30 59  
31  
32 60 *Strengths and limitations*  
33  
34

- 35 • Reliably measured data in a single nationally representative cohort in recent time  
36 periods  
37  
38

- 39 • Selection and response bias may limit the generalisability of the results to the broader  
40 Australian population  
41  
42

43  
44  
45  
46  
47 65  
48  
49  
50  
51  
52  
53  
54  
55  
56  
57  
58  
59  
60

66 **ABSTRACT**

67 Objective: To assess for the first time in a single cohort whether annual weight and waist  
68 circumference (WC) change has varied over time.

69 Design: Longitudinal cohort study with three surveys, 1 – 1999/2000; 2 – 2004/2005; 3 –  
70 2011/2012. Generalized linear mixed models with random effects were used to compare  
71 annual weight and WC change between surveys 1 and 2 (Period 1) with that between surveys  
72 2 and 3 (Period 2). Models were adjusted for age, sex, education status, area-level  
73 disadvantage, ethnicity, body mass index, diabetes status, and smoking status.

74 Setting: The Australian Diabetes, Obesity and Lifestyle study (AusDiab) - a population-  
75 based, stratified-cluster survey of 11, 247 adults aged  $\geq 25$  years, recruited in 1999 -2000.

76 Participants: 3,351 Australian adults who attended each of three surveys and had complete  
77 measures of weight, WC and covariates at each survey.

78 Primary outcome measures: Weight and WC were measured according to standard protocols  
79 at each survey.

80 Results: Mean weight and WC increased in both Periods. Annual weight gain in Period 2  
81 was 0.11 kg/year (95% CI 0.06–0.15) less than in Period 1. Improvement in annual weight  
82 gain between the two periods was not seen for those with greatest area-level disadvantage, or  
83 in men over the age of 55. In contrast, the annual WC increase in Period 2 was greater than in  
84 Period 1 (0.07 cm/year, 95% CI 0.01–0.12). In those with least area-level disadvantage only,  
85 annual WC gain was less in Period 2 than Period 1.

86 Conclusions: Between 2004/5–2011/2, Australian adults in a national study continued to gain  
87 weight, but more slowly than 1999/2000–2004/5. While some obesity prevention strategies

1  
2  
3 88 may be working, they do not appear to be affecting WC, older men or those in more

4  
5 89 disadvantaged groups.

6  
7  
8 90

9  
10  
11  
12  
13  
14  
15  
16  
17  
18  
19  
20  
21  
22  
23  
24  
25  
26  
27  
28  
29  
30  
31  
32  
33  
34  
35  
36  
37  
38  
39  
40  
41  
42  
43  
44  
45  
46  
47  
48  
49  
50  
51  
52  
53  
54  
55  
56  
57  
58  
59  
60

For peer review only

1  
2  
3 91 Obesity in adults has increased rapidly over the past few decades, leading to prevalence of  
4  
5 92 over one quarter in many developed countries. There is growing acceptance that strong  
6  
7 93 preventive measures are required to stem the increasing prevalence, with a variety of  
8  
9  
10 94 approaches implemented, ranging from social marketing through whole of community  
11  
12 95 interventions to regulatory strategies. However, it is difficult to evaluate whether elements of  
13  
14 96 the approach to date have had a beneficial effect.

15  
16  
17 97 There have been some suggestions that obesity prevention interventions in children have had  
18  
19 98 a positive effect, due to the observation that the prevalence of obesity is no longer increasing  
20  
21 99 at the same rate. A recent review of 52 studies, from 25 countries, comparing obesity  
22  
23  
24 100 prevalence at two time points since 1999 [1] concluded that in more developed nations a  
25  
26 101 likely slowing of the rate of increase in obesity prevalence was occurring in children, with a  
27  
28 102 possible turning point around 2000. However, trends in adults generally appeared to be  
29  
30 103 continuing to increase. Since this review, an analysis of US adults through the repeated  
31  
32 104 National Health and Nutrition Examination Surveys (NHANES) between 1999 and 2010  
33  
34 105 suggested no increase in mean body mass index (BMI) or obesity prevalence over that time  
35  
36 106 period in non-Hispanic white and Hispanic women, but continued increases in men and non-  
37  
38 107 Hispanic black and Mexican American women [2]. In Australia, the latest reported data  
39  
40 108 suggests a continued increase in obesity prevalence in adults to 2012 [3]. However,  
41  
42 109 prevalence data is driven by a range of factors, including migration, mortality and response  
43  
44 110 bias. To determine whether the degree of weight gain in the population has slowed over time,  
45  
46 111 a comparison of the rates of weight change is required.

47  
48  
49  
50  
51 112 We aimed to analyse whether the degree of change in weight and waist circumference (WC)  
52  
53 113 over time differed in a single cohort of adults, comparing weight and WC change in the same  
54  
55 114 individuals between two consecutive time periods. We used the national Australian Diabetes,  
56  
57  
58  
59  
60



1  
2  
3 115 Obesity and Lifestyle cohort (AusDiab) [4], and compared annual change in weight and WC  
4  
5 116 between 2000 and 2005 to that between 2005 and 2012.  
6  
7  
8  
9 117  
10  
11  
12  
13  
14  
15  
16  
17  
18  
19  
20  
21  
22  
23  
24  
25  
26  
27  
28  
29  
30  
31  
32  
33  
34  
35  
36  
37  
38  
39  
40  
41  
42  
43  
44  
45  
46  
47  
48  
49  
50  
51  
52  
53  
54  
55  
56  
57  
58  
59  
60

For peer review only

1  
2  
3 118 **METHODS**  
4  
5

6 119 **Setting and Participants**  
7  
8

9 120 The Australian Diabetes, Obesity and Lifestyle study (AusDiab) is a population-based,  
10  
11 121 stratified-cluster survey of 11, 247 adults aged  $\geq 25$  years, recruited in 1999 -2000  
12  
13 122 (AusDiab1). Methods and response rates have been described previously[4]. Five-year  
14  
15 123 follow-up was conducted in 2004-2005 (AusDiab2) and a 12-year follow-up was conducted  
16  
17 124 in 2012 (AusDiab3). From the original cohort, 6,400 and 4,614 returned for physical  
18  
19 125 examination and interviewer-administered questionnaire at AusDiab2 and AusDiab3,  
20  
21 126 respectively. For this analysis we excluded participants with missing data on weight or WC  
22  
23 127 at any of AusDiab 1, 2 or 3, leaving 3,908 participants. We further excluded those  
24  
25 128 participants missing any of the variables used as covariates at AusDiab 1 or 2, resulting in a  
26  
27 129 final sample size of 3,351. Ethics approval was obtained from the International Diabetes  
28  
29 130 Institute, Monash University, and the Alfred Hospital Melbourne. All participants consented  
30  
31 131 to participate in the study.  
32  
33  
34

35  
36 132 All study assessments followed a similar protocol. Data were collected by interviewer-  
37  
38 133 administered questionnaires on medical history, lifestyle and health behaviour. Data on  
39  
40 134 education, country of birth, smoking and physical activity and television viewing habits  
41  
42 135 were obtained by questionnaire. Self-reported cardiovascular disease was ascertained by  
43  
44 136 asking if participants had been told by a doctor or nurse that they had angina, myocardial  
45  
46 137 infarction, or stroke.  
47  
48

49  
50 138 Smoking status was defined as 1) current daily smoker and 2) ex-smoker (smoking less than  
51  
52 139 daily for at least the last 3 months, but used to smoke daily) and non-smoker (never smoked  
53  
54 140 tobacco daily) combined.  
55  
56  
57  
58  
59  
60

1  
2  
3 141 Education level was ascertained by asking the question “Which of these describes the highest  
4  
5 142 qualification you have received?” Education was categorised as secondary only (comprising  
6  
7 143 those with a secondary school qualification), diploma (comprising nursing or teaching  
8  
9 144 qualification, trade certificate or undergraduate diploma), and degree (comprising bachelor  
10  
11 145 degree, post-graduate diploma or masters degree/doctorate)[5].  
12

13  
14  
15 146 Area-level disadvantage was estimated using the Index of Relative Disadvantage code from  
16  
17 147 the Socio-economic Indexes for Areas (SEIFA). The index was developed by the Australian  
18  
19 148 Bureau of Statistics, to create a summary measure from a group of 20 variables (related to  
20  
21 149 education, income, employment, family composition, housing benefits, car ownership,  
22  
23 150 ethnicity, English language proficiency, residential overcrowding) displaying dimensions of  
24  
25 151 social disadvantage [6]. The index is constructed so that high values reflect areas with high  
26  
27 152 socio-economic status (relative advantage) and low values reflect areas with low socio-  
28  
29 153 economic status (relative disadvantage). Tertiles of disadvantage were calculated amongst the  
30  
31 154 final study sample.  
32

33  
34  
35  
36 155 Physical activity was measured via an interviewer-administered Active Australia  
37  
38 156 questionnaire, which considered participation in predominantly leisure-time physical  
39  
40 157 activities (including walking for transport) during the previous week [7]. Total physical  
41  
42 158 activity time was calculated as the sum of the time spent walking (if continuous and for  $\geq 10$   
43  
44 159 minutes) or performing moderate-intensity activity, plus double the time spent in vigorous-  
45  
46 160 intensity physical activity [8].  
47

48  
49  
50 161 Self-reported television viewing time was calculated as the total time spent watching  
51  
52 162 television or videos in the previous week, and is considered a reliable and valid estimate of  
53  
54 163 television viewing time among adults [9].  
55  
56  
57  
58  
59  
60

1  
2  
3 164 Average daily energy intake was assessed using a self-administered validated food frequency  
4  
5 165 questionnaire (FFQ) [10], which included 74 items (with 10 frequency options), with  
6  
7 166 additional questions on food habits, portion size and consumption of alcoholic beverages. In  
8  
9 167 AusDiab1, blood pressure was measured using a standard mercury sphygmomanometer in the  
10  
11 168 state of Victoria only and by Dinamap elsewhere. To account for any effect due to differential  
12  
13 169 measurement error, manual blood pressure measurements were adjusted as previously  
14  
15 170 described [Briganti, Shaw et al. 2003]. In AusDiab 2 and 3, blood pressure was measured by  
16  
17 171 an Omron machine. Fasting serum total cholesterol was measured with an Olympus AU600  
18  
19 172 analyser (Olympus Optical, Tokyo, Japan) at a central laboratory [11].  
20  
21

22  
23 173 Classification of diabetes status has been described elsewhere [11]. Briefly, participants were  
24  
25 174 classified as having 'known diabetes' if they reported having doctor diagnosed diabetes and  
26  
27 175 were either taking hypoglycaemic medication or had fasting plasma glucose (FPG)  
28  
29 176  $\geq 7.0$ mmol/L or a 2-hour plasma glucose (PG) $\geq 11.1$ mmol/L. Participants not reporting  
30  
31 177 diabetes but with FPG $\geq 7.0$ mmol/L or 2-hour PG $\geq 11.1$ mmol/L were classified as having  
32  
33 178 'newly diagnosed diabetes'.  
34  
35

### 36 179 **Outcomes**

37  
38  
39 180 Height was measured without shoes, using a stadiometer and recorded to the nearest 0.5 cm.  
40  
41 181 Weight was measured without shoes, excess clothing, and items in pockets by a single  
42  
43 182 measurement at each survey. Weight at AusDiab1 was measured using a mechanical beam  
44  
45 183 balance. Weight at AusDiab 2 and 3 was measured using digital weighing scales. Weight was  
46  
47 184 recorded to the nearest 0.1 kg. At all surveys, scales were calibrated using 5kg weights prior  
48  
49 185 to each set of measurements. BMI was obtained from the calculation of weight (kg) divided  
50  
51 186 by height (m<sup>2</sup>). Annual weight change was calculated as the difference in weight between  
52  
53 187 AusDiab 1 and 2 (Period 1), or AusDiab 2 and 3 (Period 2), divided by the follow-up time  
54  
55 188 between the two consecutive surveys.  
56  
57  
58  
59  
60

1  
2  
3 189 Waist circumference was measured twice, halfway between the lower border of the ribs and  
4  
5 190 the iliac crest on a horizontal plane. If measurements varied by >2 cm, a third was taken; the  
6  
7 191 mean of the two closest measurements was calculated. Annual WC change was calculated as  
8  
9  
10 192 the difference in WC between AusDiab 1 and 2, or AusDiab 2 and 3, divided by the follow-  
11  
12 193 up time between the two consecutive surveys.

### 14 194 **Statistical analysis**

15  
16  
17 195 Baseline characteristics (means and proportions at AusDiab1) were compared between  
18  
19 196 AusDiab participants with and without complete measures at AusDiab 1, 2 and 3.  
20  
21 197 Characteristics of the included population were also compared in 2000 and 2005,  
22  
23 198 representing the two baseline surveys for the two weight change periods.

24  
25  
26 199 The difference in annual weight and WC change in Period 1 (2000 to 2005), compared to  
27  
28 200 Period 2 (2005 and 2012), was assessed using linear regression analysis. Generalized linear  
29  
30 201 mixed models with random effects were used to analyse the association between study period  
31  
32 202 on annual weight or WC change. This model includes random effects associated with both  
33  
34 203 the cluster and the units of analysis (participants) to take the clustered structure of the data  
35  
36 204 into account and to allow the residuals associated with the longitudinal measures on the same  
37  
38 205 unit of analysis to be correlated. Models were adjusted sequentially for age and sex, (Model  
39  
40 206 1), additionally adjusting for smoking, education, area level disadvantage and country of birth  
41  
42 207 (Model 2), additionally adjusting for baseline BMI and diabetes status (Model 3), and  
43  
44 208 additionally adjusting for baseline TV time, exercise time, and energy intake (Model 4).  
45  
46  
47 209 Baseline refers to the variables measured at AusDiab1 for change in Period 1, and AusDiab2  
48  
49 210 for change in Period 2. The association between study period and annual weight and WC  
50  
51 211 change was also analysed across sub-groups and interaction terms between study period with  
52  
53 212 age or sex were analysed.  
54  
55  
56  
57  
58  
59  
60

1  
2  
3 213 The primary analyses were repeated after excluding the few participants with annual weight  
4  
5 214 change greater than 5 kg/y or less than -5 kg/y, and restricting participants to the overlapping  
6  
7 215 age group of 30–80.  
8

9  
10 216 All analyses were performed in STATA (version 11.0), with statistical significance set at the  
11  
12 217 5% level.  
13

14 218  
15  
16  
17  
18  
19  
20  
21  
22  
23  
24  
25  
26  
27  
28  
29  
30  
31  
32  
33  
34  
35  
36  
37  
38  
39  
40  
41  
42  
43  
44  
45  
46  
47  
48  
49  
50  
51  
52  
53  
54  
55  
56  
57  
58  
59  
60

For peer review only

1  
2  
3 219 **RESULTS**  
4  
5

6 220 The population with complete measures was similar to the total AusDiab cohort with respect  
7  
8 221 to sex and weight, but was younger, with higher educational attainment, and a higher  
9  
10 222 prevalence of never smoking (Table 1). The population with complete measures also had a  
11  
12 223 lower prevalence of chronic disease. There was no appreciable difference between the two  
13  
14 224 groups for weight change in Period 1 after adjustment for differences in age and sex.

15  
16  
17  
18 225 (Table 1 here)  
19

20  
21 226 Participant characteristics in 2000 and 2005 were compared (Table 2). In 2005, in addition to  
22  
23 227 being five years older, the population had a higher prevalence of diabetes (predominantly  
24  
25 228 type 2). In both periods the average change in weight and WC was a gain. In Period 2, a  
26  
27 229 smaller proportion of the population gained weight and annual weight gain was less, at 0.13  
28  
29 230 kg/year compared to 0.34 kg/year in Period 1. This difference resulted from a lesser weight  
30  
31 231 change across the entire distribution of weight change in Period 2, with minimal difference at  
32  
33 232 the 5<sup>th</sup> percentile, increasing to a difference of 0.50kg/year at the 95<sup>th</sup> percentile of weight  
34  
35 233 change (Appendix Figure 1A). For WC, there was no difference in the crude annual change  
36  
37 234 between the two periods (Table 2). In contrast to weight change, this resulted from both a  
38  
39 235 smaller gain in those whose WC increased and a smaller loss in those whose WC decreased  
40  
41 236 (Appendix Figure 1B). The correlation between annual weight change and annual WC  
42  
43 237 change was 0.69 (0.68 in Period 1, and 0.71 in Period 2).  
44  
45  
46  
47

48 238 (Table 2 here)  
49

50  
51 239 Comparison of the crude annual weight change for matching 10-year age-groups in Periods 1  
52  
53 240 and 2 indicated a smaller weight gain in Period 2 for most age and sex groups, although these  
54  
55 241 differences were only significant for men aged 35–44, and women 45–54 and 65–74  
56  
57  
58  
59  
60

1  
2  
3 242 (Appendix Table 1). Comparison of the crude annual WC change for matching age-groups in  
4  
5 243 Periods 1 and 2 indicated no difference in WC gain between the two periods for women and a  
6  
7 244 generally larger WC gain in Period 2 for men (significant for men aged 45–54 and 55–64;  
8  
9 245 Appendix Table 1).

11  
12 246 The difference in annual weight and WC change in Period 2, compared to Period 1, was  
13  
14 247 assessed using linear regression analysis (Table 3A). In Period 2, annual weight gain was  
15  
16 248 0.11 kg/year (95% CI 0.06, 0.15) less than in Period 1. This did not alter substantially after  
17  
18 249 further adjustment for smoking status, education status, ethnicity, area-level disadvantage,  
19  
20 250 baseline BMI and diabetes status (Table 3A), nor after adjustment for TV time, exercise time  
21  
22 251 and energy intake (results not shown).

23  
24  
25  
26  
27 252 Annual weight gain in Period 2 was less than in Period 1 for most sub-groups (Table 3A),  
28  
29 253 with suggestions of a greater difference over time in women, and those aged under 55 years  
30  
31 254 (although no interaction tests on these factors were significant). Annual weight gain in Period  
32  
33 255 2 was non-significantly less than in Period 1 for those with high educational attainment  
34  
35 256 (borderline significant), obesity, and those from a non-English speaking background. No  
36  
37 257 difference in annual weight gain between the two periods was observed for those in the tertile  
38  
39 258 of greatest area-level disadvantage, nor for current smokers.

40  
41  
42  
43 259 In Period 2, annual WC gain was 0.07 cm/year more than in Period 1 (Table 3B). This did not  
44  
45 260 alter substantially after further adjustment for smoking status, education status, area-level  
46  
47 261 disadvantage, ethnicity, baseline BMI and diabetes status (Table 3B), nor after adjustment for  
48  
49 262 TV time, exercise time and energy intake (results not shown).

50  
51  
52  
53 263 In stratified analyses no difference in annual WC gain between the two periods was observed  
54  
55 264 for women, those aged <55 years, those in the highest education group, those with normal  
56  
57  
58  
59  
60



1  
2  
3 265 weight nor ex-smokers. Annual WC gain was less in Period 2 than Period 1 for those in the  
4  
5 266 tertile of least area-level disadvantage (-0.14cm/year 95%CI -.05, -0.23).  
6  
7

8 267 (Table 3 here)  
9

10  
11 268 For both weight and WC, there was an apparent combined sex and age effect, such that older  
12  
13 269 men had the least favourable changes over time (Figure 1).  
14

15  
16 270 The primary analyses were repeated after excluding the few participants with annual weight  
17  
18 271 change greater than 5 kg/y or less than -5 kg/y, and restricting participants to the overlapping  
19  
20 272 age group of 30–80. No differences in results were seen.  
21  
22

23 273  
24

25 274  
26  
27  
28

## 29 275 **DISCUSSION**

30  
31  
32  
33 276 In this analysis of a single cohort of Australian adults, weight and WC increased in the most  
34  
35 277 recent period in all population sub-groups examined. Annual weight gain between 2005–2012  
36  
37 278 was less than between 1999/2000–2005, but annual WC gain was greater. Improvements over  
38  
39 279 time were not seen in older men or those with greatest area-level social disadvantage.  
40  
41

42 280  
43  
44

45  
46 281 The lack of difference in annual weight and WC change between the two periods observed  
47  
48 282 for current smokers, those from a non-English speaking background and those with obesity,  
49  
50 283 is likely to reflect small sample sizes in these groups. In general, adjustment for covariates  
51  
52 284 had little effect on the observed associations between study period and annual weight and  
53  
54 285 WC change. As time spent watching TV, exercise and energy intake might be expected to be  
55  
56 286 mediating some of the observed changes, we had expected a greater impact after adjustment  
57  
58  
59  
60

1  
2  
3 287 for these factors. The lack of impact after adjustment likely reflects that they are relatively  
4  
5 288 blunt instruments to detect small changes in behaviour over time.  
6  
7

8 289 The general observation that annual weight gain may be lessening over time supports the  
9  
10 290 cross-sectional time series observations of a plateau in the prevalence of obesity and rate of  
11  
12 291 change in BMI. However, these results also suggest that the general observations do not tell  
13  
14 292 the whole story, with large differences between different population subgroups, and a  
15  
16 293 contrasting observation for waist circumference. The sex differences observed here are  
17  
18 294 similar to the cross-sectional trends reported for American adults for whom a clear plateau in  
19  
20 295 obesity prevalence has been observed for women but not men [2]. The differences we  
21  
22 296 observed according to level of area-level disadvantage also reflect findings from the review  
23  
24 297 of obesity trends in which the levelling off of obesity was generally more pronounced in  
25  
26 298 groups with higher socio-economic position [1]. It is possible, based on current reports of  
27  
28 299 levelling off of obesity prevalence in children, that different trends would be observed in  
29  
30 300 Australian children, and it will be important to do a similar analysis in a longitudinal  
31  
32 301 children's cohort.  
33  
34  
35

36  
37 302 The observation that rates of WC change may be continuing to increase even as rates of  
38  
39 303 weight change decrease may reflect prior findings using the NHANES data that WC is  
40  
41 304 increasing to a greater extent than expected from changes in weight [12] [13]. While we  
42  
43 305 observed changes in weight and WC to be highly correlated these results combined suggest a  
44  
45 306 preferential increase in abdominal adiposity over time, which is thought to be associated with  
46  
47 307 greater risk of cardio-metabolic outcomes [14]. The potential implication that current  
48  
49 308 bodyweight trends are leading a more metabolically active obesity, with increased risks for  
50  
51 309 outcomes such as diabetes, hypertension and cardiovascular disease warrants further  
52  
53 310 investigation.  
54  
55  
56  
57  
58  
59  
60

1  
2  
3 311 The key strength of the current study is that for the first time it addresses this important  
4  
5 312 question through an analysis of the same cohort of adults over two distinct but recent time  
6  
7 313 periods. In doing this, conclusions can be drawn about the changes over time independent of  
8  
9 314 unmeasurable differences in cohorts. Other strengths include the national population  
10  
11 315 sampling strategy of the AusDiab cohort and the measured weight and WC at each study  
12  
13 316 wave.

14  
15  
16  
17 317 The potential limitation of the current study is the lack of generalisability of the included  
18  
19 318 cohort. As with all cohort studies, the AusDiab cohort is a selected population, and those who  
20  
21 319 attended all three waves are more select again, with higher educational attainment and a  
22  
23 320 lower prevalence of chronic disease and risk factors. It is possible that a generally more  
24  
25 321 healthy and health conscious population has a stronger response to population health  
26  
27 322 messages, and consequently the decrease in weight gain observed here over time may be  
28  
29 323 greater than would be observed for the general population. However, the current observations  
30  
31 324 lend support to the concept that weight gain is decreasing over time in the population, even if  
32  
33 325 the AusDiab cohort represents a particularly sensitive indicator.

34  
35  
36  
37 326 The results also suggest there is no room for complacency in obesity prevention. The rates of  
38  
39 327 overweight and obesity remain high, the average change in weight and WC remains an  
40  
41 328 increase and there is no reduction in annual WC gain. Further, no improvements in weight or  
42  
43 329 WC change were observed in older men. Finally, the observation that no improvements in  
44  
45 330 rates of weight and WC change are being seen by those living in the most socially  
46  
47 331 disadvantaged neighbourhoods suggests current trends are likely to lead to an increase in the  
48  
49 332 social inequalities in obesity, and consequent ill health [15]. It is critical that further studies  
50  
51 333 are conducted to confirm these findings and that we work to identify the causes of the  
52  
53 334 observed improvements, as well as the lack of improvement in WC and specific population  
54  
55 335 sub-groups.  
56  
57  
58  
59  
60

1  
2  
3 336 In summary, between 2004/5 and 2011/2 Australian adults continued to gain weight: WC at a  
4  
5 337 faster rate than between 1999/2000 and 2004/4, and weight at a slower rate. While some  
6  
7 338 obesity prevention strategies may be working, they are not affecting WC, older men or those  
8  
9 339 in lower SEP groups.  
10

11  
12 340  
13

14  
15 341  
16

17  
18 342  
19

20  
21 343  
22  
23  
24  
25  
26  
27  
28  
29  
30  
31  
32  
33  
34  
35  
36  
37  
38  
39  
40  
41  
42  
43  
44  
45  
46  
47  
48  
49  
50  
51  
52  
53  
54  
55  
56  
57  
58  
59  
60

For peer review only

1  
2  
3 344 **Acknowledgements**  
4

5 345 The authors would like to acknowledge all AusDiab participants, investigators and sponsors.  
6

7 346 The authors would like to acknowledge Parneet Sethi for useful discussions on this work.  
8

9  
10 347  
11  
12  
13  
14  
15  
16  
17  
18  
19  
20  
21  
22  
23  
24  
25  
26  
27  
28  
29  
30  
31  
32  
33  
34  
35  
36  
37  
38  
39  
40  
41  
42  
43  
44  
45  
46  
47  
48  
49  
50  
51  
52  
53  
54  
55  
56  
57  
58  
59  
60

For peer review only

348 **References**

- 349 1. Rokholm B, Baker JL, Sorensen TI. The levelling off of the obesity epidemic since the  
350 year 1999--a review of evidence and perspectives. *Obes Rev* 2010;**11**(12):835-46 doi:  
351 10.1111/j.1467-789X.2010.00810.x[published Online First: Epub Date]].
- 352 2. Flegal KM, Carroll MD, Kit BK, Ogden CL. Prevalence of obesity and trends in the  
353 distribution of body mass index among US adults, 1999-2010. *JAMA*  
354 2012;**307**(5):491-7 doi: 10.1001/jama.2012.39[published Online First: Epub Date]].
- 355 3. Statistics ABo. Australian Health Survey: First Results, 2011-12. Canberra: Australian  
356 Bureau of Statistics, 2012.
- 357 4. Dunstan DW, Zimmet PZ, Welborn TA, et al. The Australian Diabetes, Obesity and  
358 Lifestyle Study (AusDiab)--methods and response rates. *Diabetes Res Clin Pract*  
359 2002;**57**(2):119-29
- 360 5. Williams ED, Magliano DJ, Zimmet PZ, et al. Area-level socioeconomic status and  
361 incidence of abnormal glucose metabolism: the Australian Diabetes, Obesity and  
362 Lifestyle (AusDiab) study. *Diabetes Care* 2012;**35**(7):1455-61 doi: 10.2337/dc11-  
363 1410[published Online First: Epub Date]].
- 364 6. Statistics ABo. Information Paper - Census of Population and Housing: Socio-Economic  
365 Indexes for Areas Australia 2001. : Australian Bureau of Statistics, 2001.
- 366 7. Australian Institute of Health and Welfare. The Active Australia Survey. A guide and  
367 manual for implementation, analysis and reporting. Canberra: Australian Institute of  
368 Health and Welfare, 2003.
- 369 8. Armstrong T, Bauman A, Davies J. Physical activity patterns of Australian adults. Results  
370 of the 1999 National Physical Scivity Survey. Australian Institute of Health and  
371 Welfare cat No CVD10. Canberra: Australian Institute of Health and Welfare, 2000.

- 1  
2  
3 372 9. Salmon J, Bauman A, Crawford D, Timperio A, Owen N. The association between  
4  
5 373 television viewing and overweight among Australian adults participating in varying  
6  
7 374 levels of leisure-time physical activity. *Int. J. Obes. Relat. Metab. Disord.*  
8  
9 375 2000;**24**:600-6
- 10  
11 376 10. Ireland P, Jolley D, Giles G, et al. Development of the Melbourne FFQ: A food frequency  
12  
13 377 questionnaire for use in an Australian prospective study involving an ethnically  
14  
15 378 diverse cohort. *Asia Pacific J Clin Nutr* 1994;**3**:19-31
- 16  
17  
18 379 11. Magliano DJ, Barr EL, Zimmet PZ, et al. Glucose indices, health behaviors, and  
19  
20 380 incidence of diabetes in Australia: the Australian Diabetes, Obesity and Lifestyle  
21  
22 381 Study. *Diabetes Care* 2008;**31**(2):267-72 doi: 10.2337/dc07-0912[published Online  
23  
24 382 First: Epub Date]].
- 25  
26  
27 383 12. Elobeid MA, Desmond RA, Thomas O, Keith SW, Allison DB. Waist circumference  
28  
29 384 values are increasing beyond those expected from BMI increases. *Obesity (Silver*  
30  
31 385 *Spring)* 2007;**15**(10):2380-3 doi: 15/10/2380 [pii]  
32  
33 386 10.1038/oby.2007.282[published Online First: Epub Date]].
- 34  
35  
36 387 13. Walls HL, Stevenson CE, Mannan HR, et al. Comparing trends in BMI and waist  
37  
38 388 circumference. *Obesity (Silver Spring)* 2011;**19**(1):216-9 doi: oby2010149 [pii]  
39  
40 389 10.1038/oby.2010.149[published Online First: Epub Date]].
- 41  
42  
43 390 14. Welborn TA, Dhaliwal SS, Bennett SA. Waist-hip ratio is the dominant risk factor  
44  
45 391 predicting cardiovascular death in Australia. *Med J Aust* 2003;**179**(11-12):580-5
- 46  
47 392 15. Backholer K, Mannan HR, Magliano D, et al. Projected socioeconomic disparities in the  
48  
49 393 prevalence of obesity amongst Australian adults. *Australian and New Zealand Journal*  
50  
51 394 *of Public Health* 2012;**in press**
- 52  
53 395  
54  
55 396  
56  
57  
58  
59  
60

1  
2  
3  
4  
5  
6  
7  
8  
9  
10  
11  
12  
13  
14  
15  
16  
17  
18  
19  
20  
21  
22  
23  
24  
25  
26  
27  
28  
29  
30  
31  
32  
33  
34  
35  
36  
37  
38  
39  
40  
41  
42  
43  
44  
45  
46  
47  
48  
49  
50  
51  
52  
53  
54  
55  
56  
57  
58  
59  
60

397

398 **Figures**

399 Figure 1. Difference in annual change in weight (kg/year) or waist circumference (cm/year)  
400 between Period 2 and Period 1, by age and sex. Adjusted for age.

401

402

403

404

405

For peer review only



406 **Tables**407 **Table 1** Comparison of characteristics in 1999/2000 between the included and excluded

408 population

| Baseline characteristics                      | Included    | Excluded    |
|-----------------------------------------------|-------------|-------------|
| n                                             | 3351        | 7896        |
| Sex (% men)                                   | 45          | 45          |
| Age (mean, y)*                                | 49 (11)     | 52 (16)     |
| Education (% post high school)*               | 67          | 56          |
| Area-level disadvantage (% in lowest tertile) | 25          | 36          |
| Born in Australia or New Zealand (%)          | 80          | 74          |
| Never smoker (%)*                             | 63          | 51          |
| Weight (mean, kg)                             | 76 (16)     | 78 (17)     |
| Waist circumference (mean, cm)                | 89 (13)     | 92 (14)     |
| Energy intake (mean, kj/day)                  | 8225 (3112) | 8137 (3566) |
| TV viewing time (mean, minutes/week)          | 703 (512)   | 829 (613)   |
| Exercise Time (mean, minutes/week)            | 283 (329)   | 269 (332)   |
| Diabetes (%)*                                 | 4.9         | 10.1        |
| Coronary heart disease (%)*                   | 2           | 5           |
| Hypertension (%)                              | 23          | 29          |
| High blood cholesterol (%)                    | 26          | 25          |

409 Notes: data are % or mean (SD) \*Indicates a significant difference (p&lt;0.05)

**Table 2** Characteristics of the cohort in 1999/2000 and 2005

| <b>Cross-sectional characteristics</b> | <b>2000</b>     | <b>2005</b>     |
|----------------------------------------|-----------------|-----------------|
| Age (mean, y)*                         | 49.3 (11.1)     | 54.3 (11.1)     |
| Weight (mean, kg)                      | 76.2 (15.6)     | 77.9 (16.3)     |
| Waist circumference (mean, cm)         | 89.4 (13.4)     | 91.6 (13.6)     |
| Smoking status (% never)               | 63              | 61              |
| Diabetes (%)                           | 4.9             | 6.4             |
| Exercise time (mean, minutes/week)*    | 283 (330)       | 306 (338)       |
| TV time (mean, minutes/week)*          | 703 (512)       | 764 (539)       |
| Energy intake (mean, kj/day)*          | 8225 (3112)     | 7681 (2998)     |
| <b>Changes during follow-up</b>        | <b>Period 1</b> | <b>Period 2</b> |
| Weight change (mean, kg)               | 1.7 (5.2)       | 0.9 (6.1)       |
| Waist circumference change (mean, cm)  | 2.1 (6.2)       | 3.2 (6.9)       |
| Follow-up (mean, y)*                   | 5.0 (0.15)      | 6.9 (0.34)      |
| Proportion gaining weight (%)*         | 64.5            | 56.8            |
| Annual weight change (mean, kg/y)*     | 0.34 (1.04)     | 0.13 (0.89)     |
| Annual WC change (mean, cm/y)          | 0.43 (1.25)     | 0.46 (1.00)     |

Notes: Data are % or mean (SD) \*Indicates a significant difference (p<0.05)

Table 3 Change in Period 2 compared to Period 1 in annual weight change (kg/year) (A); and waist circumference change (cm/year) (B)

(A)

|                                             | Sample size | Annual weight change<br>in Period 1 | Change in Period 2 compared to change in Period 1 |                      |                      |
|---------------------------------------------|-------------|-------------------------------------|---------------------------------------------------|----------------------|----------------------|
|                                             |             |                                     | Model 1                                           | Model 2              | Model 3              |
| Total Population                            | 3351        | 0.34 (0.30-0.37)                    | -0.11 (-0.15--<br>0.06)*                          | -0.10 (-0.15--0.06)* | -0.10 (-0.15--0.06)* |
| Men                                         | 1503        | 0.29 (0.24-0.34)                    | -0.08 (-0.14--<br>0.01)*                          | -0.07 (-0.14--0.01)* | -0.08 (-0.15--0.01)* |
| Women                                       | 1848        | 0.37 (0.32-0.42)                    | -0.13 (-0.20--<br>0.07)*                          | -0.13 (-0.19--0.06)* | -0.13 (-0.19--0.06)* |
| Age<55                                      | 2311        | 0.46 (0.41-0.50)                    | -0.12 (-0.19--<br>0.06)*                          | -0.12 (-0.18--0.06)* | -0.13 (-0.19--0.06)* |
| Age>=55                                     | 1040        | 0.07 (0.01-0.12)                    | -0.08 (-0.15--<br>0.02)*                          | -0.08 (-0.15--0.01)* | -0.07 (-0.14--0.01)* |
| Education- secondary &<br>trade certificate | 2073        | 0.34 (0.30-0.39)                    | -0.13 (-0.19--<br>0.07)*                          | -0.13 (-0.19--0.07)* | -0.13 (-0.19--0.07)* |
| Education- diploma &<br>degree              | 1278        | 0.32 (0.27-0.38)                    | -0.07 (-0.14-0.00)                                | -0.07 (-0.14-0.00)   | -0.06 (-0.14-0.01)   |
| Area level disadvantage-<br>tertile of most | 1096        | 0.31 (0.24-0.37)                    | -0.01 (-0.09-0.07)                                | -0.01 (-0.09-0.07)   | -0.01 (-0.10-0.07)   |

|    |                          |      |                  |                          |                      |
|----|--------------------------|------|------------------|--------------------------|----------------------|
| 1  |                          |      |                  |                          |                      |
| 2  |                          |      |                  |                          |                      |
| 3  |                          |      |                  |                          |                      |
| 4  |                          |      |                  |                          |                      |
| 5  | disadvantage             |      |                  |                          |                      |
| 6  | Area level disadvantage- |      |                  |                          |                      |
| 7  | middle tertile           | 1130 | 0.40 (0.34-0.47) | -0.23 (-0.31--<br>0.14)* | -0.22 (-0.31--0.14)* |
| 8  |                          |      |                  |                          |                      |
| 9  | Area level disadvantage- |      |                  |                          |                      |
| 10 | tertile of least         | 1125 | 0.30 (0.24-0.35) | -0.08 (-0.16--<br>0.01)* | -0.08 (-0.15--0.00)* |
| 11 | disadvantage             |      |                  |                          |                      |
| 12 | Normal weight            |      |                  |                          |                      |
| 13 |                          | 1342 | 0.4 (0.36-0.44)  | -0.07 (-0.13--<br>0.01)* | -0.07 (-0.13--0.01)* |
| 14 |                          |      |                  |                          |                      |
| 15 | Overweight               |      |                  |                          |                      |
| 16 |                          | 1375 | 0.31 (0.26-0.37) | -0.12 (-0.18--<br>0.05)* | -0.11 (-0.18--0.04)* |
| 17 |                          |      |                  |                          |                      |
| 18 | Obese                    | 633  | 0.25 (0.14-0.36) | -0.13 (-0.26-0.01)*      | -0.13 (-0.26-0.01)*  |
| 19 |                          |      |                  |                          |                      |
| 20 | English speaking         |      |                  |                          |                      |
| 21 | country of birth         | 3129 | 0.34 (0.30-0.37) | -0.10 (-0.15--<br>0.06)* | -0.1 (-0.15--0.05)*  |
| 22 |                          |      |                  |                          |                      |
| 23 | Non-English speaking     | 222  | 0.32 (0.18-0.46) | -0.15 (-0.32-0.02)       | -0.14 (-0.32-0.04)   |
| 24 | country of birth         |      |                  |                          |                      |
| 25 | Never smokers            |      |                  |                          |                      |
| 26 |                          | 2121 | 0.34 (0.29-0.38) | -0.10 (-0.15--<br>0.04)* | -0.1 (-0.15--0.04)*  |
| 27 |                          |      |                  |                          |                      |
| 28 | Ex smokers               |      |                  |                          |                      |
| 29 |                          | 894  | 0.27 (0.20-0.34) | -0.15 (-0.24--<br>0.06)* | -0.15 (-0.24--0.06)* |
| 30 |                          |      |                  |                          |                      |
| 31 | Current smokers          | 336  | 0.49 (0.36-0.63) | -0.01 (-0.20-0.19)       | 0.00 (-0.20-0.20)    |
| 32 |                          |      |                  |                          |                      |
| 33 | No chronic disease#      |      |                  |                          |                      |
| 34 |                          | 1944 | 0.42 (0.37-0.47) | -0.10 (-0.16--<br>0.04)* | -0.10 (-0.16--0.04)* |
| 35 |                          |      |                  |                          |                      |
| 36 |                          |      |                  |                          |                      |
| 37 |                          |      |                  |                          |                      |
| 38 |                          |      |                  |                          |                      |
| 39 |                          |      |                  |                          |                      |
| 40 |                          |      |                  |                          |                      |
| 41 |                          |      |                  |                          |                      |
| 42 |                          |      |                  |                          |                      |
| 43 |                          |      |                  |                          |                      |
| 44 |                          |      |                  |                          |                      |
| 45 |                          |      |                  |                          |                      |
| 46 |                          |      |                  |                          |                      |
| 47 |                          |      |                  |                          |                      |
| 48 |                          |      |                  |                          |                      |
| 49 |                          |      |                  |                          |                      |

|                                                        | Sample size | Annual WC change in Period 1 | Model 1              | Model 2              | Model 3              |
|--------------------------------------------------------|-------------|------------------------------|----------------------|----------------------|----------------------|
| Chronic disease#                                       | 1407        | 0.25 (0.20-0.30)             | -0.12 (-0.19--0.05)* | -0.11 (-0.19--0.04)* | -0.10 (-0.17--0.02)* |
| <i>(B)</i>                                             |             |                              |                      |                      |                      |
| Total Population                                       | 3351        | 0.43 (0.39-0.48)             | 0.07 (0.02-0.12)*    | 0.07 (0.02-0.13)*    | 0.07 (0.01-0.12)*    |
| Men                                                    | 1503        | 0.32 (0.26-0.38)             | 0.13 (0.05-0.20)*    | 0.13 (0.06-0.21)*    | 0.12 (0.05-0.20)*    |
| Women                                                  | 1848        | 0.53 (0.47-0.59)             | 0.02 (-0.06-0.10)    | 0.03 (-0.05-0.11)    | 0.02 (-0.05-0.10)    |
| Age<55                                                 | 2311        | 0.50 (0.45-0.55)             | 0.05 (-0.03-0.12)    | 0.05 (-0.02-0.13)    | 0.05 (-0.03-0.12)    |
| Age>=55                                                | 1040        | 0.28 (0.21-0.35)             | 0.10 (0.02-0.18)*    | 0.10 (0.02-0.19)*    | 0.10 (0.02-0.18)*    |
| Education- secondary & trade certificate               | 2073        | 0.44 (0.39-0.49)             | 0.09 (0.02-0.15)*    | 0.09 (0.02-0.16)*    | 0.08 (0.01-0.15)*    |
| Education- diploma & degree                            | 1278        | 0.43 (0.36-0.50)             | 0.05 (-0.04-0.14)    | 0.05 (-0.04-0.14)    | 0.05 (-0.04-0.14)    |
| Area level disadvantage- tertile of most disadvantage  | 1096        | 0.41 (0.34-0.49)             | 0.13 (0.04-0.23)*    | 0.13 (0.04-0.23)*    | 0.14 (0.04-0.23)*    |
| Area level disadvantage- middle tertile                | 1130        | 0.32 (0.24-0.40)             | 0.21 (0.11-0.31)*    | 0.22 (0.12-0.32)*    | 0.22 (0.12-0.32)*    |
| Area level disadvantage- tertile of least disadvantage | 1125        | 0.57 (0.50-0.64)             | -0.14 (-0.23--0.05)* | -0.13 (-0.22--0.05)* | -0.15 (-0.23--0.06)* |

1  
2  
3  
4  
5  
6  
7  
8  
9  
10  
11  
12  
13  
14  
15  
16  
17  
18  
19  
20  
21  
22  
23  
24  
25  
26  
27  
28  
29  
30  
31  
32  
33  
34  
35  
36  
37  
38  
39  
40  
41  
42  
43  
44  
45  
46  
47  
48  
49

|                                       |      |                  |                   |                   |                   |
|---------------------------------------|------|------------------|-------------------|-------------------|-------------------|
| Normal weight                         | 1342 | 0.48 (0.42-0.54) | 0.04 (-0.04-0.12) | 0.04 (-0.04-0.12) | 0.03 (-0.05-0.12) |
| Overweight                            | 1375 | 0.43 (0.36-0.49) | 0.08 (-0.01-0.16) | 0.08 (-0.00-0.17) | 0.07 (-0.02-0.15) |
| Obese                                 | 633  | 0.35 (0.24-0.46) | 0.12 (-0.01-0.26) | 0.13 (-0.00-0.27) | 0.11 (-0.02-0.25) |
| English speaking country of birth     | 3129 | 0.44 (0.40-0.48) | 0.06 (0.01-0.12)* | 0.07 (0.01-0.13)* | 0.06 (0.01-0.12)* |
| Non-English speaking country of birth | 222  | 0.35 (0.18-0.52) | 0.17 (-0.04-0.38) | 0.18 (-0.02-0.39) | 0.17 (-0.03-0.38) |
| Never smokers                         | 2121 | 0.44 (0.39-0.49) | 0.07 (0.00-0.14)* | 0.07 (0.01-0.14)* | 0.07 (0.00-0.14)* |
| Ex smokers                            | 894  | 0.38 (0.30-0.46) | 0.04 (-0.06-0.14) | 0.04 (-0.06-0.14) | 0.03 (-0.08-0.13) |
| Current smokers                       | 336  | 0.56 (0.40-0.71) | 0.17 (-0.05-0.39) | 0.17 (-0.05-0.40) | 0.18 (-0.04-0.41) |
| Chronic disease <sup>1</sup>          | 1944 | 0.47 (0.41-0.52) | 0.06 (-0.01-0.13) | 0.07 (-0.01-0.14) | 0.07 (-0.01-0.14) |
| No chronic disease <sup>1</sup>       | 1407 | 0.44 (0.39-0.49) | 0.08 (-0.00-0.17) | 0.09 (0.00-0.17)* | 0.1 (0.01-0.18)*  |

Model 1- adjusting for age and sex

Model 2- additionally adjusting for smoking status, education status, area-level disadvantage and ethnicity

Model 3- additionally adjusting for baseline BMI and diabetes status

\* indicates p<0.05

<sup>1</sup> Chronic disease refers to any of coronary heart disease, cholesterol, hypertension, or diabetes at baseline

Figure 1. Difference in annual change in weight (kg/year) or waist circumference (cm/year) between Period 2 and Period 1, by age and sex. Adjusted for age.

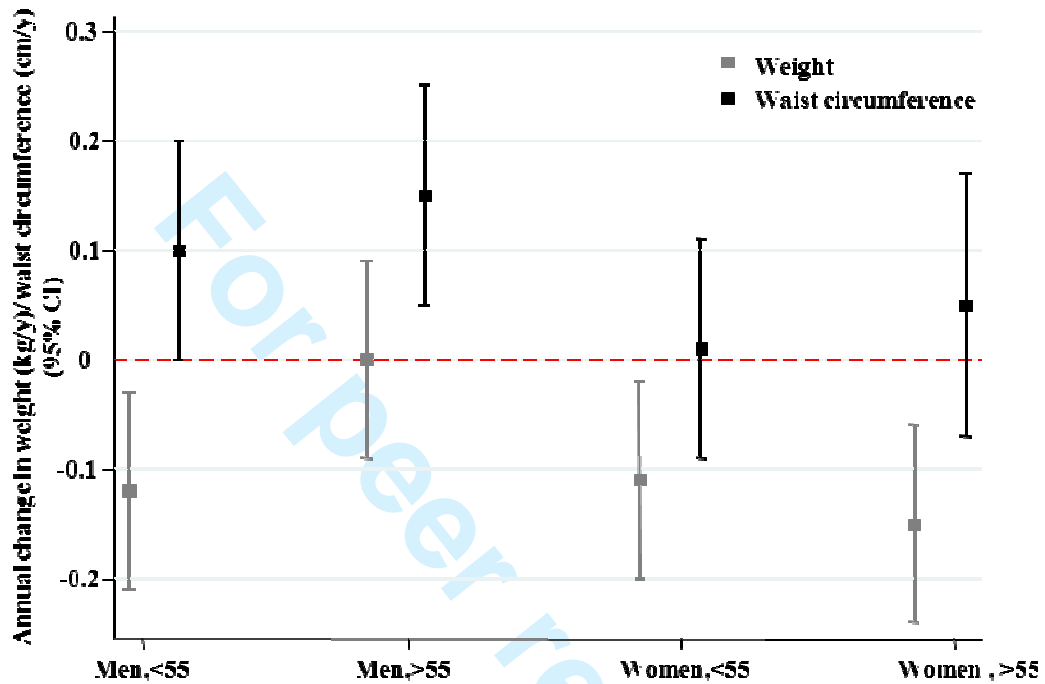

1  
2  
3  
4  
5  
6  
7  
8  
9  
10  
11  
12  
13  
14  
15  
16  
17  
18  
19  
20  
21  
22  
23  
24  
25  
26  
27  
28  
29  
30  
31  
32  
33  
34  
35  
36  
37  
38  
39  
40  
41  
42  
43  
44  
45  
46  
47  
48  
49  
50  
51  
52  
53  
54  
55  
56  
57  
58  
59  
60

Appendix

Figure 1 Annual weight and waist circumference change in Period 1 and Period 2

A. Annual weight change

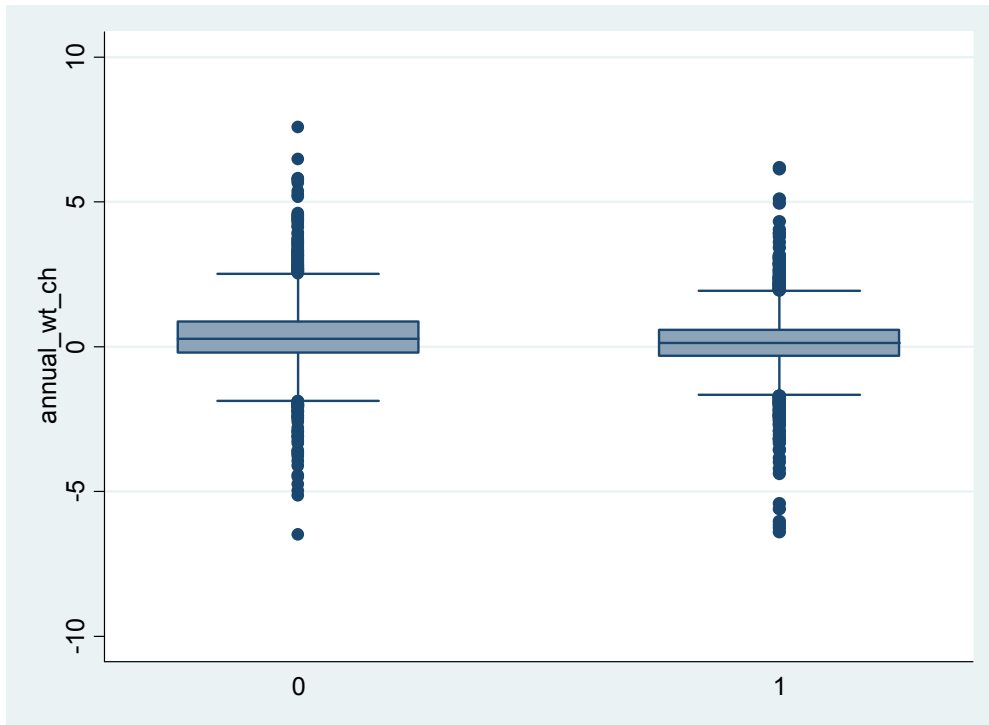

For peer review only



B. Annual waist circumference change

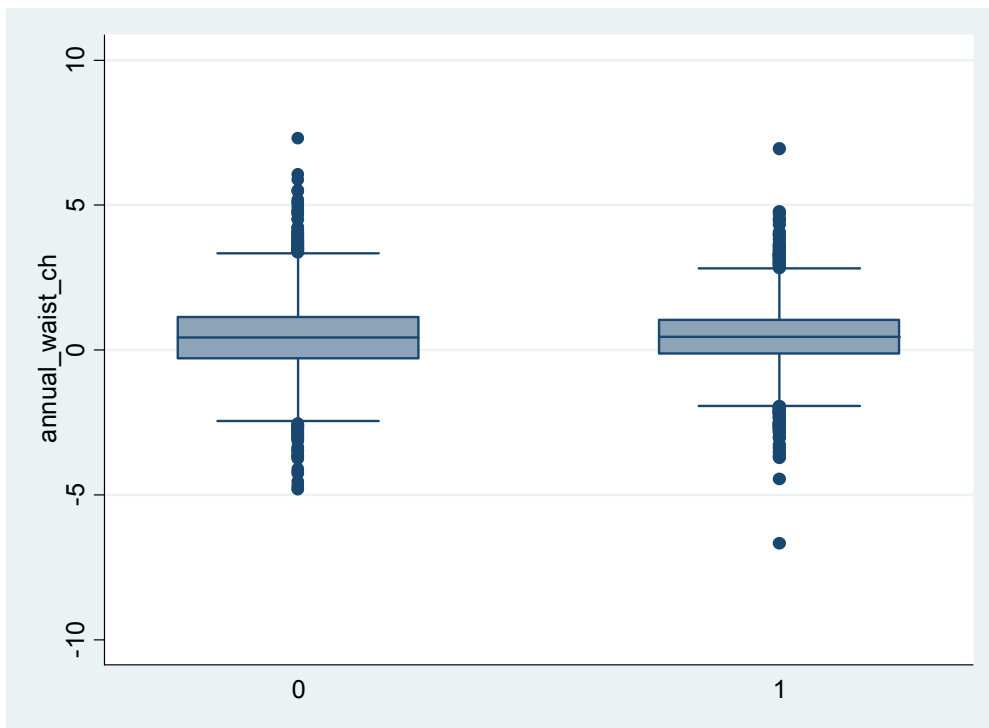

Review only

1  
2  
3  
4  
5  
6  
7  
8  
9  
10  
11  
12  
13  
14  
15  
16  
17  
18  
19  
20  
21  
22  
23  
24  
25  
26  
27  
28  
29  
30  
31  
32  
33  
34  
35  
36  
37  
38  
39  
40  
41  
42  
43  
44  
45  
46  
47  
48  
49  
50  
51  
52  
53  
54  
55  
56  
57  
58  
59  
60

**Table 1** Comparison of annual weight and waist circumference change between Period 1 and Period 2 for matching age groups.

| Sex   | Age group | Difference in annual weight change | Difference in annual WC change |
|-------|-----------|------------------------------------|--------------------------------|
| Men   | 25-34     | -0.08 (-0.5, 0.35)                 | -0.10 (-0.53, 0.32)            |
|       | 35-44     | -0.18 (-0.34, -0.02)*              | 0.12 (-0.06, 0.30)             |
|       | 45-54     | -0.10 (-0.22, 0.01)                | 0.13 (0.01, 0.26)              |
|       | 55-64     | -0.03 (-0.1, 0.16)                 | 0.20 (0.05, 0.34)              |
|       | 65-74     | -0.12 (-0.26, 0.02)                | 0.05 (-0.12, 0.23)             |
|       | 75+       | 0.27 (-0.10, 0.65)                 | 0.26 (-0.19, 0.72)             |
|       | Women     | 25-34                              | -0.08 (-0.46, 0.31)            |
| 35-44 |           | -0.12 (-0.26, 0.03)                | -0.02 (-0.19, 0.16)            |
| 45-54 |           | -0.15 (-0.26, -0.04)*              | -0.01 (-0.14, 0.12)            |
| 55-64 |           | -0.09 (-0.20, 0.02)                | 0.08 (-0.07, 0.23)             |
| 65-74 |           | -0.34 (-0.50, -0.17)*              | -0.08 (-0.31, 0.16)            |
| 75+   |           | 0.02 (-0.37, 0.41)                 | 0.27 (-0.32, .85)              |

\*Indicates a significant difference ( $p < 0.05$ )

Appendix

Figure 1 Annual weight and waist circumference change in Period 1 and Period 2

A. Annual weight change

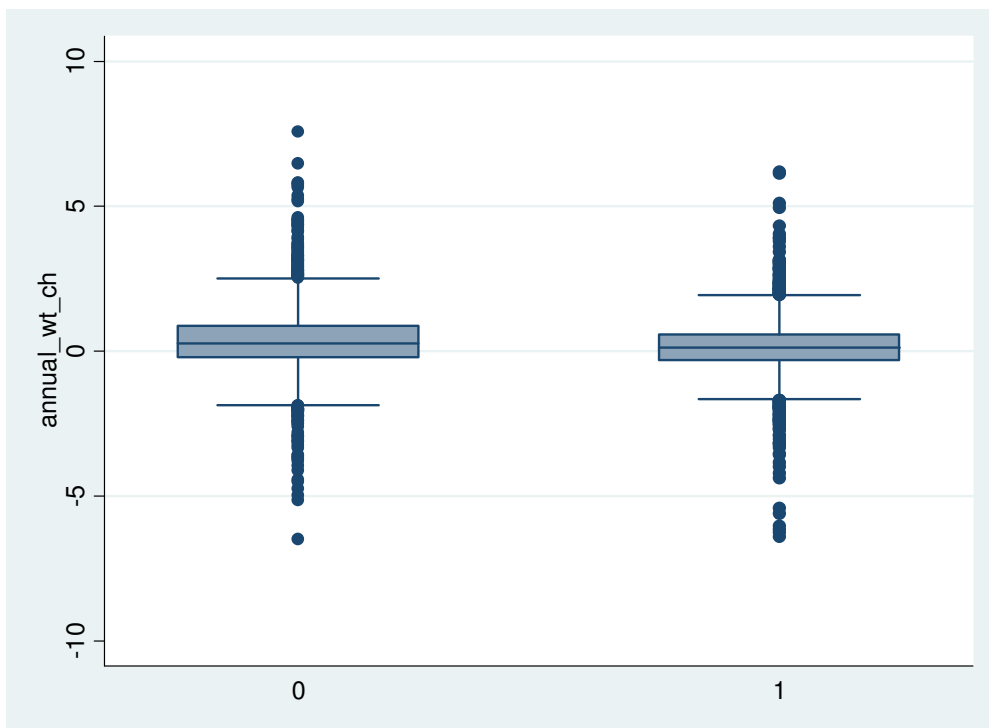

ew only

1  
2  
3  
4  
5  
6  
7  
8  
9  
10  
11  
12  
13  
14  
15  
16  
17  
18  
19  
20  
21  
22  
23  
24  
25  
26  
27  
28  
29  
30  
31  
32  
33  
34  
35  
36  
37  
38  
39  
40  
41  
42  
43  
44  
45  
46  
47  
48  
49  
50  
51  
52  
53  
54  
55  
56  
57  
58  
59  
60

B. Annual waist circumference change

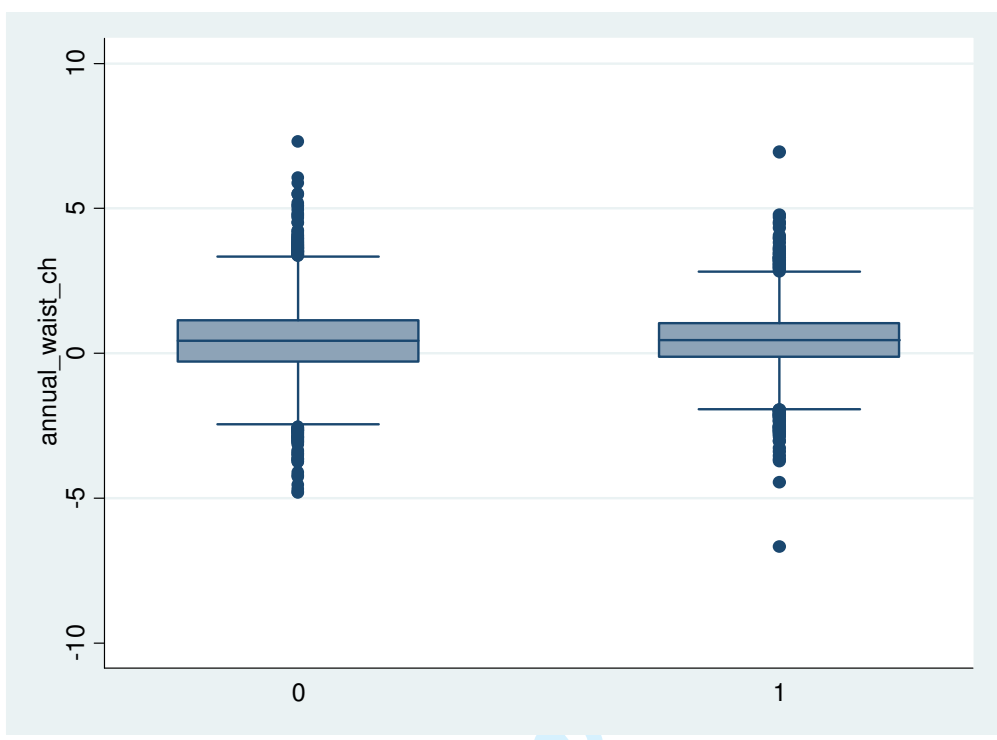

**Table 1** Comparison of annual weight and waist circumference change between Period 1 and Period 2 for matching age groups.

| Sex   | Age group | Difference in annual weight change | Difference in annual WC change |
|-------|-----------|------------------------------------|--------------------------------|
| Men   | 25-34     | -0.08 (-0.5, 0.35)                 | -0.10 (-0.53, 0.32)            |
|       | 35-44     | -0.18 (-0.34, -0.02)*              | 0.12 (-0.06, 0.30)             |
|       | 45-54     | -0.10 (-0.22, 0.01)                | 0.13 (0.01, 0.26)              |
|       | 55-64     | -0.03 (-0.1, 0.16)                 | 0.20 (0.05, 0.34)              |
|       | 65-74     | -0.12 (-0.26, 0.02)                | 0.05 (-0.12, 0.23)             |
|       | 75+       | 0.27 (-0.10, 0.65)                 | 0.26 (-0.19, 0.72)             |
|       | Women     | 25-34                              | -0.08 (-0.46, 0.31)            |
| 35-44 |           | -0.12 (-0.26, 0.03)                | -0.02 (-0.19, 0.16)            |
| 45-54 |           | -0.15 (-0.26, -0.04)*              | -0.01 (-0.14, 0.12)            |
| 55-64 |           | -0.09 (-0.20, 0.02)                | 0.08 (-0.07, 0.23)             |
| 65-74 |           | -0.34 (-0.50, -0.17)*              | -0.08 (-0.31, 0.16)            |
| 75+   |           | 0.02 (-0.37, 0.41)                 | 0.27 (-0.32, .85)              |

\*Indicates a significant difference ( $p < 0.05$ )

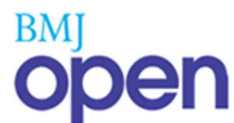

## Changes in the rates of weight and waist circumference gain in Australian adults over time

|                                 |                                                                                                                                                                                                                                                                                                                                                                                                                 |
|---------------------------------|-----------------------------------------------------------------------------------------------------------------------------------------------------------------------------------------------------------------------------------------------------------------------------------------------------------------------------------------------------------------------------------------------------------------|
| Journal:                        | <i>BMJ Open</i>                                                                                                                                                                                                                                                                                                                                                                                                 |
| Manuscript ID:                  | bmjopen-2013-003667.R1                                                                                                                                                                                                                                                                                                                                                                                          |
| Article Type:                   | Research                                                                                                                                                                                                                                                                                                                                                                                                        |
| Date Submitted by the Author:   | 07-Nov-2013                                                                                                                                                                                                                                                                                                                                                                                                     |
| Complete List of Authors:       | Peeters, Anna; Baker IDI Heart and Diabetes Institute, Obesity and Population Health; Baker IDI Heart and Diabetes Institute, Clinical Diabetes and Epidemiology<br>Magliano, Diana; Baker IDI Heart and Diabetes Institute,<br>Backholer, Kathryn; Baker IDI Heart and Diabetes Institute,<br>Zimmet, Paul; Baker IDI Heart and Diabetes Institute,<br>Shaw, Jonathan; Baker IDI Heart and Diabetes Institute, |
| <b>Primary Subject Heading</b>: | Public health                                                                                                                                                                                                                                                                                                                                                                                                   |
| Secondary Subject Heading:      | Epidemiology, Diabetes and endocrinology                                                                                                                                                                                                                                                                                                                                                                        |
| Keywords:                       | obesity, trends, cohort                                                                                                                                                                                                                                                                                                                                                                                         |
|                                 |                                                                                                                                                                                                                                                                                                                                                                                                                 |

SCHOLARONE™  
Manuscripts

1  
2  
3 1 **Changes in the rates of weight and waist circumference gain in Australian adults over**  
4  
5 2 **time.**  
6  
7  
8  
9  
10  
11  
12  
13  
14  
15  
16  
17  
18  
19  
20  
21  
22  
23  
24  
25  
26  
27  
28  
29  
30  
31  
32  
33  
34  
35  
36  
37  
38  
39  
40  
41  
42  
43  
44  
45  
46  
47  
48  
49  
50  
51  
52  
53  
54  
55  
56  
57  
58  
59  
60

4 Anna Peeters (Head, Obesity and Population Health)<sup>1</sup>, Dianna J Magliano (Head, Diabetes  
5 and Population Health)<sup>1</sup>, Kathryn Backholer (Research Fellow)<sup>1</sup>, Paul Zimmet (Emeritus  
6 Director)<sup>1</sup>, Jonathan E Shaw (Director, Clinical Epidemiology and Diabetes)<sup>1</sup>

7 1 Baker IDI Heart and Diabetes Institute, Melbourne 3004, Victoria, Australia

9 **Running title:** Change in weight and waist gain over time

11 **Corresponding author:**

12 Anna Peeters

13 Obesity and Population Health

14 Baker IDI Heart and Diabetes Institute

15 Commercial Rd

16 Melbourne 3004

17 Australia

18 Phone: +61 3 8532 1928

19 Email: [anna.peeters@bakeridi.edu.au](mailto:anna.peeters@bakeridi.edu.au)

20

1  
2  
3 21 **ABSTRACT**  
4  
5

6 22 **Objective:** To assess in a single cohort whether annual weight and waist circumference (WC)  
7  
8 23 change has varied over time.  
9

10  
11 24 **Design:** Longitudinal cohort study with three surveys, 1 – 1999/2000; 2 – 2004/2005; 3 –  
12  
13 25 2011/2012. Generalized linear mixed models with random effects were used to compare  
14  
15 26 annualised weight and WC change between surveys 1 and 2 (Period 1) with that between  
16  
17 27 surveys 2 and 3 (Period 2). Models were adjusted for age to analyse changes with time rather  
18  
19 28 than age. Models were additionally adjusted for sex, education status, area-level socio-  
20  
21 29 economic disadvantage, ethnicity, body mass index, diabetes status, and smoking status.  
22  
23

24  
25 30 **Setting:** The Australian Diabetes, Obesity and Lifestyle study (AusDiab) - a population-  
26  
27 31 based, stratified-cluster survey of 11, 247 adults aged  $\geq 25$  years.  
28  
29

30  
31 32 **Participants:** 3,351 Australian adults who attended each of three surveys and had complete  
32  
33 33 measures of weight, WC and covariates.  
34  
35

36  
37 34 **Primary outcome measures:** Weight and WC were measured according to standard  
38  
39 35 protocols at each survey. Change in weight and WC was annualised for comparison between  
40  
41 36 the two Periods.  
42

43  
44 37 **Results:** Mean weight and WC increased in both Periods. Annualised weight gain in Period  
45  
46 38 2 was 0.11kg/year (95% CI 0.06–0.15) less than in Period 1. Lesser annual weight gain  
47  
48 39 between the two periods was not seen for those with greatest area-level socio-economic  
49  
50 40 disadvantage, or in men over the age of 55. In contrast, the annualised WC increase in Period  
51  
52 41 2 was greater than in Period 1 (0.07cm/year, 95% CI 0.01–0.12). The increase was greatest in  
53  
54 42 males 55+ and those with greater area-level socio-economic disadvantage.  
55  
56  
57  
58  
59  
60



1  
2  
3 43 **Conclusions:** Between 2004/5–2011/2, Australian adults in a national study continued to gain  
4  
5 44 weight, but more slowly than 1999/2000–2004/5. While weight gain may be slowing, it does  
6  
7 45 not appear to be affecting older men or those in more disadvantaged groups, and the same  
8  
9 46 cannot be said for WC.  
10  
11  
12  
13 47  
14  
15 48  
16  
17 49  
18  
19 50  
20  
21 51  
22  
23 52  
24  
25 53  
26  
27 54  
28  
29 55  
30  
31 56  
32  
33 57  
34  
35 58  
36  
37 59  
38  
39 60  
40  
41 61  
42  
43  
44  
45  
46  
47  
48  
49  
50  
51  
52  
53  
54  
55  
56  
57  
58  
59  
60

For peer review only

1  
2  
3 62 *Article summary*  
4  
5

6 63 *Article focus*  
7  
8

- 9 • We aimed to assess in a single cohort whether change in weight and waist  
10  
11 circumference has changed in recent time periods, independent of age.  
12  
13

14 66 *Key messages*  
15  
16

- 17 • Between 2004/5–2011/2, Australian adults in this national cohort study continued to  
18  
19 gain weight, but more slowly than 1999/2000–2004/5.  
20  
21

- 22 • In contrast waist circumference gain was greater in the most recent period. Important  
23  
24 differences were observed according to area-level socio-economic disadvantage.  
25  
26

- 27 • While weight gain may be slowing, this has not been observed for older men or those  
28  
29 in more disadvantaged groups.  
30  
31  
32

33 73 *Strengths and limitations*  
34  
35

- 36 • Reliably measured data in a single nationally representative cohort in recent time  
37  
38 periods  
39  
40

- 41 • Analyses adjusted and matched for age for comparison between Periods to enable  
42  
43 analysis of changes over time, rather than age  
44  
45

- 46 • Selection and response bias may limit the generalisability of the results to the broader  
47  
48 Australian population  
49  
50  
51

52 80  
53  
54  
55  
56  
57  
58  
59  
60

1  
2  
3 81 Obesity in adults has increased rapidly over the past few decades, leading to prevalence of  
4  
5 82 over one quarter in many developed countries [1]. There is growing acceptance that strong  
6  
7 83 preventive measures are required to stem the increasing prevalence, with a variety of  
8  
9  
10 84 approaches implemented, ranging from social marketing through whole of community  
11  
12 85 interventions to regulatory strategies.

13  
14  
15 86 There have been some suggestions that obesity prevention interventions in children have had  
16  
17 87 a positive effect, due to the observation that the prevalence of obesity is no longer increasing  
18  
19 88 at the same rate [2] [3]. A recent review of 52 studies, from 25 countries, comparing obesity  
20  
21 89 prevalence at two time points since 1999 [4] concluded that in more developed nations a  
22  
23 90 likely slowing of the rate of increase in obesity prevalence was occurring in children, with a  
24  
25 91 possible turning point around 2000. However, trends in adults in this review generally  
26  
27 92 appeared to be continuing to increase. Since this review, an analysis of US adults through the  
28  
29 93 repeated National Health and Nutrition Examination Surveys (NHANES) between 1999 and  
30  
31 94 2010 suggested no increase in mean body mass index (BMI) or obesity prevalence over that  
32  
33 95 time period in non-Hispanic white and Hispanic women, but continued increases in men and  
34  
35 96 non-Hispanic black and Mexican American women [5]. In Australia, the latest reported data  
36  
37 97 suggests a continued increase in obesity prevalence in adults to 2012 [6]. However,  
38  
39 98 prevalence data is driven by a range of factors, including migration, mortality and response  
40  
41 99 bias. To determine whether the degree of weight gain in the population has slowed over time,  
42  
43  
44  
45  
46 100 a comparison of the rates of weight change is required.

47  
48  
49 101 We aimed to analyse whether the degree of change in weight and waist circumference (WC)  
50  
51 102 over time differed in a single cohort of adults, comparing weight and WC change in the same  
52  
53 103 individuals between two consecutive time periods, adjusting for age. We used the national  
54  
55 104 Australian Diabetes, Obesity and Lifestyle cohort (AusDiab) [7], and compared annualised  
56  
57  
58 105 change in weight and WC between 2000 and 2005 to that between 2005 and 2012.

1  
2  
3 106 **METHODS**  
4  
5

6 107 **Setting and Participants**  
7

8  
9 108 The Australian Diabetes, Obesity and Lifestyle study (AusDiab) is a population-based,  
10  
11 109 stratified-cluster survey of 11, 247 adults aged  $\geq 25$  years, recruited in 1999 -2000  
12  
13 110 (AusDiab1). Methods and response rates have been described previously[7]. Five-year  
14  
15 111 follow-up was conducted in 2004-2005 (AusDiab2) and a 12-year follow-up was conducted  
16  
17 112 in 2012 (AusDiab3). From the original cohort, 6,400 and 4,614 returned for physical  
18  
19 113 examination and interviewer-administered questionnaire at AusDiab2 and AusDiab3,  
20  
21 114 respectively. For this analysis we excluded participants with missing data on weight or WC  
22  
23 115 at any of AusDiab 1, 2 or 3, leaving 3,908 participants. We further excluded those  
24  
25 116 participants missing any of the variables used as covariates at AusDiab 1 or 2, resulting in a  
26  
27 117 final sample size of 3,351. Ethics approval was obtained from the International Diabetes  
28  
29 118 Institute, Monash University, and the Alfred Hospital Melbourne. All participants consented  
30  
31 119 to participate in the study.  
32  
33  
34

35  
36 120 All study assessments followed a similar protocol [8] [7]. Data were collected by  
37  
38 121 interviewer-administered questionnaires on medical history, lifestyle and health behaviour.  
39  
40

41 122 **Outcomes**  
42

43  
44 123 Height was measured without shoes, using a stadiometer and recorded to the nearest 0.5 cm.  
45  
46 124 Weight was measured without shoes, excess clothing, and items in pockets by a single  
47  
48 125 measurement at each survey. Weight at AusDiab1 was measured using a mechanical beam  
49  
50 126 balance. Weight at AusDiab 2 and 3 was measured using digital weighing scales. Weight was  
51  
52 127 recorded to the nearest 0.1 kg. At all surveys, scales were calibrated using 5kg weights prior  
53  
54 128 to each set of measurements. BMI was obtained from the calculation of weight (kg) divided  
55  
56  
57  
58  
59  
60

1  
2  
3 129 by height (m<sup>2</sup>). Annual weight change was calculated as the difference in weight between  
4  
5 130 AusDiab 1 and 2 (Period 1), or AusDiab 2 and 3 (Period 2), divided by the follow-up time  
6  
7 131 between the two consecutive surveys.  
8  
9  
10 132 Waist circumference was measured twice, halfway between the lower border of the ribs and  
11  
12 133 the iliac crest on a horizontal plane. If measurements varied by >2 cm, a third was taken; the  
13  
14 134 mean of the two closest measurements was calculated. Annualised WC change was  
15  
16 135 calculated as the difference in WC between AusDiab 1 and 2, or AusDiab 2 and 3, divided by  
17  
18 136 the follow-up time between the two consecutive surveys.  
19  
20  
21

### 22 137 **Co-factors**

23  
24  
25 138 Data on education, country of birth, smoking and physical activity and television  
26  
27 139 viewing habits were obtained by questionnaire. Self-reported cardiovascular disease was  
28  
29 140 ascertained by asking if participants had been told by a doctor or nurse that they had angina,  
30  
31 141 myocardial infarction, or stroke.  
32  
33

34  
35 142 Smoking status was defined as 1) current daily smoker and 2) ex-smoker (smoking less than  
36  
37 143 daily for at least the last 3 months, but used to smoke daily) and non-smoker (never smoked  
38  
39 144 tobacco daily) combined [9] [7].  
40  
41

42 145 Education level was ascertained by asking the question “Which of these describes the highest  
43  
44 146 qualification you have received?” Education was categorised as secondary only (comprising  
45  
46 147 those with a secondary school qualification), diploma (comprising nursing or teaching  
47  
48 148 qualification, trade certificate or undergraduate diploma), and degree (comprising bachelor  
49  
50 149 degree, post-graduate diploma or masters degree/doctorate)[10].  
51  
52

53  
54 150 Area-level socio-economic disadvantage was estimated using the Index of Relative  
55  
56 151 Disadvantage code from the Socio-economic Indexes for Areas (SEIFA). The index was  
57  
58  
59  
60

1  
2  
3 152 developed by the Australian Bureau of Statistics, to create a summary measure from a group  
4  
5 153 of 20 variables (related to education, income, employment, family composition, housing  
6  
7 154 benefits, car ownership, ethnicity, English language proficiency, residential overcrowding)  
8  
9  
10 155 displaying dimensions of social disadvantage [11]. The index is constructed so that high  
11  
12 156 values reflect areas with high socio-economic status (relative advantage) and low values  
13  
14 157 reflect areas with low socio-economic status (relative disadvantage). Tertiles of disadvantage  
15  
16 158 were calculated amongst the final study sample.

17  
18  
19 159 Physical activity was measured via an interviewer-administered Active Australia  
20  
21 160 questionnaire, which considered participation in predominantly leisure-time physical  
22  
23 161 activities (including walking for transport) during the previous week [12]. Total physical  
24  
25 162 activity time was calculated as the sum of the time spent walking (if continuous and for  $\geq 10$   
26  
27 163 minutes) or performing moderate-intensity activity, plus double the time spent in vigorous-  
28  
29 164 intensity physical activity [13].

30  
31  
32  
33 165 Self-reported television viewing time was calculated as the total time spent watching  
34  
35 166 television or videos in the previous week, and is considered a reliable and valid estimate of  
36  
37 167 television viewing time among adults [14].

38  
39  
40  
41 168 Average daily energy intake was assessed using a self-administered food frequency  
42  
43 169 questionnaire (FFQ) [15], which included 74 items (with 10 frequency options), with  
44  
45 170 additional questions on food habits, portion size and consumption of alcoholic beverages. In  
46  
47 171 AusDiab1, blood pressure was measured using a standard mercury sphygmomanometer in the  
48  
49 172 state of Victoria only and by Dinamap elsewhere. To account for any effect due to differential  
50  
51 173 measurement error, manual blood pressure measurements were adjusted as previously  
52  
53 174 described [16]. In AusDiab 2 and 3, blood pressure was measured by an Omron machine.  
54  
55  
56  
57  
58  
59  
60

1  
2  
3 175 Fasting serum total cholesterol was measured with an Olympus AU600 analyser (Olympus  
4  
5 176 Optical, Tokyo, Japan) at a central laboratory [17].  
6  
7  
8 177 Classification of diabetes status has been described elsewhere [17]. Briefly, participants were  
9  
10 178 classified as having 'known diabetes' if they reported having doctor diagnosed diabetes and  
11  
12 179 were either taking hypoglycaemic medication or had fasting plasma glucose (FPG)  
13  
14 180  $\geq 7.0$ mmol/L or a 2-hour plasma glucose (PG)  $\geq 11.1$ mmol/L. Participants not reporting  
15  
16 181 diabetes but with FPG  $\geq 7.0$ mmol/L or 2-hour PG  $\geq 11.1$ mmol/L were classified as having  
17  
18 182 'newly diagnosed diabetes'.  
19

### 20 21 183 Statistical analysis

22  
23 184 Baseline characteristics (means and proportions at AusDiab1) were compared between  
24  
25 185 AusDiab participants with and without complete measures at AusDiab 1, 2 and 3.  
26  
27 186 Characteristics of the included population were also compared in 2000 and 2005,  
28  
29 187 representing the two baseline surveys for the two weight change periods.  
30

31  
32 188 The difference in annualised weight and WC change in Period 1 (2000 to 2005), compared to  
33  
34 189 Period 2 (2005 and 2012), was assessed using linear regression analysis. Generalized linear  
35  
36 190 mixed models with random effects were used to analyse the association between study period  
37  
38 191 on annual weight or WC change. This model includes random effects associated with both  
39  
40 192 the cluster and the units of analysis (participants) to take the clustered structure of the data  
41  
42 193 into account and to allow the residuals associated with the longitudinal measures on the same  
43  
44 194 unit of analysis to be correlated. Models were adjusted sequentially for age and sex, (Model  
45  
46 195 1), additionally adjusting for smoking, education, area level disadvantage and country of birth  
47  
48 196 (Model 2), additionally adjusting for baseline BMI and diabetes status (Model 3), and  
49  
50 197 additionally adjusting for baseline TV time, exercise time, and energy intake (Model 4).  
51  
52 198 Baseline refers to the variables measured at AusDiab1 for change in Period 1, and AusDiab2  
53  
54 199 for change in Period 2. Adjustment for age enables the differences in weight and WC change  
55  
56  
57  
58  
59  
60

1  
2  
3 200 observed between the two Periods to be attributed to time rather than age. The association  
4  
5 201 between study period and annualised weight and WC change was also analysed across sub-  
6  
7 202 groups and interaction terms between study period with age or sex were analysed.  
8

9  
10 203 The primary analyses were repeated after excluding the few participants with annual weight  
11  
12 204 change greater than 5 kg/y or less than -5 kg/y, and restricting participants to the overlapping  
13  
14 205 age group of 30–80.

15  
16 206 All analyses were performed in STATA (version 11.0), with statistical significance set at the  
17  
18 207 5% level.  
19

20  
21 208  
22  
23  
24  
25  
26  
27  
28  
29  
30  
31  
32  
33  
34  
35  
36  
37  
38  
39  
40  
41  
42  
43  
44  
45  
46  
47  
48  
49  
50  
51  
52  
53  
54  
55  
56  
57  
58  
59  
60



209 **RESULTS**

210 The population with complete measures was similar to the total AusDiab cohort with respect  
211 to sex and weight, but was younger, with higher educational attainment, and a higher  
212 prevalence of never smoking (Table 1). The population with complete measures also had a  
213 lower prevalence of chronic disease. There was no appreciable difference between the two  
214 groups for weight change in Period 1 after adjustment for differences in age and sex.

215 (Table 1 here)

216 Participant characteristics in 2000 and 2005 were compared (Table 2). In 2005, in addition to  
217 being five years older, the population had a higher prevalence of diabetes (predominantly  
218 type 2). In both periods the average change in weight and WC was a gain. In Period 2, a  
219 smaller proportion of the population gained weight and annualised weight gain was less, at  
220 0.13 kg/year compared to 0.34 kg/year in Period 1. This difference resulted from a lesser  
221 weight change across the entire distribution of weight change in Period 2, with minimal  
222 difference at the 5<sup>th</sup> percentile, increasing to a difference of 0.50kg/year at the 95<sup>th</sup> percentile  
223 of weight change (Appendix Figure 1A). For WC, there was no difference in the crude  
224 annualised change between the two periods (Table 2). In contrast to weight change, this  
225 resulted from both a smaller gain in those whose WC increased and a smaller loss in those  
226 whose WC decreased (Appendix Figure 1B). The correlation between weight and WC change  
227 was 0.69 (0.68 in Period 1, and 0.71 in Period 2).

228 (Table 2 here)

229 Comparison of the crude annualised weight change for matching 10-year age-groups in  
230 Periods 1 and 2 indicated a smaller weight gain in Period 2 for most age and sex groups,  
231 although these differences were only significant for men aged 35–44, and women 45–54 and

1  
2  
3 232 65–74 (Appendix Table 1). Comparison of the crude annualised WC change for matching  
4  
5 233 age-groups in Periods 1 and 2 indicated no difference in WC gain between the two periods  
6  
7 234 for women and a generally larger WC gain in Period 2 for men (significant for men aged 45–  
8  
9 235 54 and 55–64; Appendix Table 1).

11  
12 236 The difference in annualised weight and WC change in Period 2, compared to Period 1, was  
13  
14 237 assessed using linear regression analysis (Table 3A). In Period 2, annualised weight gain was  
15  
16 238 0.11 kg/year (95% CI 0.06, 0.15) less than in Period 1. This did not alter substantially after  
17  
18 239 further adjustment for smoking status, education status, ethnicity, area-level socio-economic  
19  
20 240 disadvantage, baseline BMI and diabetes status (Table 3A), nor after adjustment for TV time,  
21  
22 241 exercise time and energy intake (results not shown).

23  
24  
25  
26 242 Annualised weight gain in Period 2 was less than in Period 1 for most sub-groups (Table 3A),  
27  
28 243 with suggestions of a greater difference over time in women, and those aged under 55 years  
29  
30 244 (although no interaction tests on these factors were significant). Annualised weight gain in  
31  
32 245 Period 2 was non-significantly less than in Period 1 for those with high educational  
33  
34 246 attainment (borderline significant), obesity, and those from a non-English speaking  
35  
36 247 background. No difference in annualised weight gain between the two periods was observed  
37  
38 248 for those in the tertile of greatest area-level socio-economic disadvantage, nor for current  
39  
40 249 smokers.

41  
42  
43  
44  
45 250 In Period 2, annualised WC gain was 0.07 cm/year more than in Period 1 (Table 3B). This  
46  
47 251 did not alter substantially after further adjustment for smoking status, education status, area-  
48  
49 252 level socio-economic disadvantage, ethnicity, baseline BMI and diabetes status (Table 3B),  
50  
51 253 nor after adjustment for TV time, exercise time and energy intake (results not shown).

52  
53  
54  
55 254 In stratified analyses no difference in annualised WC gain between the two periods was  
56  
57 255 observed for women, those aged <55 years, those in the highest education group, those with  
58  
59  
60

1  
2  
3 256 normal weight nor ex-smokers. Annualised WC gain was less in Period 2 than Period 1 for  
4  
5 257 those in the tertile of least area-level socio-economic disadvantage (-0.14cm/year 95%CI -  
6  
7 258 .05, -0.23).

8  
9  
10 259 (Table 3 here)

11  
12  
13 260 For both weight and WC, there was an apparent combined sex and age effect, such that older  
14  
15 261 men had the least favourable changes over time (Figure 1).

16  
17  
18 262 The primary analyses were repeated after excluding the few participants with annual weight  
19  
20 263 change greater than 5 kg/y or less than -5 kg/y, and restricting participants to the overlapping  
21  
22 264 age group of 30–80. No differences in results were seen.

23  
24  
25  
26 265

## 27 28 29 266 **DISCUSSION**

30  
31  
32 267 In this analysis of a single cohort of Australian adults, weight and WC increased in the most  
33  
34 268 recent period in all population sub-groups examined. Age-adjusted annualised weight gain  
35  
36 269 between 2005–2012 was less than between 1999/2000–2005, but annualised WC gain was  
37  
38 270 greater. Lesser weight gain over time was not seen in older men or those with greatest area-  
39  
40 271 level socio-economic disadvantage.

41  
42  
43  
44 272

45  
46  
47 273 The lack of difference in weight and WC change between the two periods observed for  
48  
49 274 current smokers, those from a non-English speaking background and those with obesity, is  
50  
51 275 likely to reflect small sample sizes in these groups. In general, adjustment for covariates had  
52  
53 276 little effect on the observed associations between study period and weight and WC change.  
54  
55 277 As time spent watching TV, exercise and energy intake might be expected to be mediating

1  
2  
3 278 much of the observed changes, we had expected an observable reduction in the difference  
4  
5 279 between study periods after adjustment for these factors. The lack of impact after adjustment  
6  
7 280 likely reflects that they are relatively blunt instruments to detect small changes in behaviour  
8  
9 281 over time. The self-reported nature of these behavioural questionnaires is associated with  
10  
11 282 both differential and non-differential error [18] [19]. While validated, the FFQ is has a  
12  
13 283 limited list of foods and is affected by the inability of individuals to accurately report their  
14  
15 284 food intake retrospectively over a long period of time [20]. Further the Active Australia  
16  
17 285 questionnaire only refers to leisure time activity and TV watching is only one component of  
18  
19 286 sitting time.  
20  
21  
22

23 287  
24 288 The general observation that weight gain may be lessening over time supports the cross-  
25  
26 289 sectional time series observations of a plateau in the prevalence of obesity and rate of change  
27  
28 290 in BMI [4]. However, these results also suggest that the general observations do not tell the  
29  
30 291 whole story, with large differences between different population subgroups, and a contrasting  
31  
32 292 observation for waist circumference. The sex differences observed here are similar to the  
33  
34 293 cross-sectional trends reported for American adults for whom a clear plateau in obesity  
35  
36 294 prevalence has been observed for women but not men [5]. The differences we observed  
37  
38 295 according to level of area-level socio-economic disadvantage also reflect findings from the  
39  
40 296 review of obesity trends in which the levelling off of obesity was generally more pronounced  
41  
42 297 in groups with higher socio-economic position [4]. It will be important to do a similar  
43  
44 298 analysis in a longitudinal children's cohort, as their experience is likely to differ from that of  
45  
46 299 adults. Children have been exposed to a wide range of obesity prevention interventions,  
47  
48 300 particularly in schools, in countries such as Australia and cross-sectional trends clearly  
49  
50 301 suggest a plateauing in the prevalence of obesity in children [4].  
51  
52  
53

54  
55 302 The observation that rates of WC change may be continuing to increase even as rates of  
56  
57 303 weight change decrease may reflect prior findings using the NHANES data that WC is  
58  
59  
60

1  
2  
3 304 increasing to a greater extent than expected from changes in weight [21] [22]. While we  
4  
5 305 observed changes in weight and WC to be highly correlated these results combined suggest a  
6  
7 306 preferential increase in abdominal adiposity over time, which is thought to be associated with  
8  
9  
10 307 greater risk of cardio-metabolic outcomes [23]. The potential implication that current  
11  
12 308 bodyweight trends are leading a more metabolically active obesity, with increased risks for  
13  
14 309 outcomes such as diabetes, hypertension and cardiovascular disease warrants further  
15  
16 310 investigation.

17  
18  
19 311 The key strength of the current study is that for the first time it addresses this important  
20  
21 312 question through an analysis of the same cohort of adults over two distinct but recent time  
22  
23 313 periods, independent of the effects of ageing. In doing this, conclusions can be drawn about  
24  
25 314 the changes over time independent of unmeasurable differences in cohorts. Other strengths  
26  
27  
28 315 include the national population sampling strategy of the AusDiab cohort and the measured  
29  
30 316 weight and WC at each study wave.

31  
32  
33 317 The potential limitation of the current study is the lack of generalisability of the included  
34  
35 318 cohort. As with all cohort studies, the AusDiab cohort is a selected population, and those who  
36  
37 319 attended all three waves are more select again, with higher educational attainment and a  
38  
39 320 lower prevalence of chronic disease and risk factors. It is possible that a generally more  
40  
41 321 healthy and health conscious population has a stronger response to population health  
42  
43 322 messages, and consequently the lesser weight gain observed here in consecutive age cohorts  
44  
45 323 over time may be greater than would be observed for the general population. However, the  
46  
47 324 current observations lend support to the concept that weight gain is decreasing over time in  
48  
49 325 the population, even if the AusDiab cohort represents a particularly sensitive indicator. One  
50  
51 326 further potential limitation is the use of different weighing scales at AusDiab 2 and 3  
52  
53 327 compared to AusDiab1. Although all scales were calibrated in the same way at each survey  
54  
55  
56  
57  
58  
59  
60

1  
2  
3 328 wave, differences in variability between the scales may have led to more variability in the  
4  
5 329 change in weight in Period 1 than Period 2.  
6  
7

8 330 The results also suggest there is no room for complacency in obesity prevention. The rates of  
9  
10 331 overweight and obesity remain high, the average change in weight and WC remains an  
11  
12 332 increase and there is no reduction in the rate of WC gain. Further, no decrease in the rate of  
13  
14 333 weight or WC change were observed in older men. Finally, the observation that no decrease  
15  
16 334 in rates of weight and WC change is being seen by those living in the most socially  
17  
18 335 disadvantaged neighbourhoods suggests current trends are likely to lead to an increase in the  
19  
20 336 social inequalities in obesity, and consequent ill health [24]. It is critical that further studies  
21  
22 337 are conducted to confirm these findings and that we work to identify the causes of the  
23  
24 338 observed changes, including the differences observed in specific population sub-groups.  
25  
26  
27  
28

29 339 In summary, between 2004/5 and 2011/2 Australian adults continued to gain weight: WC at a  
30  
31 340 faster rate than between 1999/2000 and 2004/4, and weight at a slower rate. While weight  
32  
33 341 gain may be slowing, it does not appear to be affecting older men or those in more  
34  
35 342 disadvantaged groups, and the same cannot be said for WC.  
36  
37  
38

39 343

40  
41  
42 344

43  
44  
45 345

46  
47  
48 346  
49  
50  
51  
52  
53  
54  
55  
56  
57  
58  
59  
60

1  
2  
3 347 **Acknowledgements**  
4

5 348 The authors would like to acknowledge all AusDiab participants, investigators and sponsors.  
6

7 349 The authors would like to acknowledge Parneet Sethi for useful discussions on this work.  
8

9  
10 350 ***Data sharing***  
11

12 351 Extra data is available by emailing A Peeters at [anna.peeters@bakeridi.edu.au](mailto:anna.peeters@bakeridi.edu.au)  
13  
14

15  
16 352 ***Authorship statement***  
17

18 353 AP conceived of the article, executed the analysis and writing of the article and is guarantor  
19

20 354 for the article. JS, DM and KB contributed to the ideas included within and writing of the  
21

22 355 article, and provision of data. PZ contributed to the writing of the article and provision of  
23

24 356 data.  
25  
26  
27

28 357 ***Funding***  
29

30  
31 358 This work was supported by VicHealth (Fellowship, AP), the Australian National Preventive  
32

33 359 Health Agency (Project grant) and Australia Research Council (ARC-linkage grant  
34

35 360 LP12010041). J.E.S. is supported by a National Health and Medical Research Council  
36

37 361 Fellowship (586623).  
38  
39

40 362 The AusDiab study, co-coordinated by the Baker IDI Heart and Diabetes Institute, was  
41

42 363 supported in part by the Victorian Government's OIS Program, and gratefully acknowledges  
43

44 364 the generous support given by: National Health and Medical Research Council (NHMRC  
45

46 365 grant 233200), Australian Government Department of Health and Ageing. Abbott Australasia  
47

48 366 Pty Ltd, Alphapharm Pty Ltd, AstraZeneca, Bristol-Myers Squibb, City Health Centre-  
49

50 367 Diabetes Service-Canberra, Department of Health and Community Services - Northern  
51

52 368 Territory, Department of Health and Human Services – Tasmania, Department of Health –  
53

54 369 New South Wales, Department of Health – Western Australia, Department of Health – South  
55  
56  
57  
58  
59  
60

1  
2  
3 370 Australia, Department of Human Services – Victoria, Diabetes Australia, Diabetes Australia  
4  
5 371 Northern Territory, Eli Lilly Australia, Estate of the Late Edward Wilson, GlaxoSmithKline,  
6  
7 372 Jack Brockhoff Foundation, Janssen-Cilag, Kidney Health Australia, Marian & FH Flack  
8  
9 373 Trust, Menzies Research Institute, Merck Sharp & Dohme, Novartis Pharmaceuticals, Novo  
10  
11 374 Nordisk Pharmaceuticals, Pfizer Pty Ltd, Pratt Foundation, Queensland Health, Roche  
12  
13 375 Diagnostics Australia, Royal Prince Alfred Hospital, Sydney, Sanofi Aventis, Sanofi  
14  
15 376 Synthelabo.  
16  
17  
18  
19 377  
20  
21  
22  
23  
24  
25  
26  
27  
28  
29  
30  
31  
32  
33  
34  
35  
36  
37  
38  
39  
40  
41  
42  
43  
44  
45  
46  
47  
48  
49  
50  
51  
52  
53  
54  
55  
56  
57  
58  
59  
60



378 **References**

- 379 1. International Association for the Study of Obesity. Obesity the global epidemic. Secondary Obesity  
380 the global epidemic 2013. <http://www.iaso.org/iotf/obesity/obesitytheglobalepidemic/>.
- 381 2. Stamatakis E, Zaninotto P, Falaschetti E, Mindell J, Head J. Time trends in childhood and  
382 adolescent obesity in England from 1995 to 2007 and projections of prevalence to 2015. *J*  
383 *Epidemiol Community Health* 2010;64(2):167-74 doi: 10.1136/jech.2009.098723[published  
384 Online First: Epub Date]].
- 385 3. Sundblom E, Petzold M, Rasmussen F, Callmer E, Lissner L. Childhood overweight and obesity  
386 prevalences levelling off in Stockholm but socioeconomic differences persist. *Int J Obes*  
387 (Lond) 2008;32(10):1525-30 doi: 10.1038/ijo.2008.104[published Online First: Epub Date]].
- 388 4. Rokholm B, Baker JL, Sorensen TI. The levelling off of the obesity epidemic since the year 1999--a  
389 review of evidence and perspectives. *Obes Rev* 2010;11(12):835-46 doi: 10.1111/j.1467-  
390 789X.2010.00810.x[published Online First: Epub Date]].
- 391 5. Flegal KM, Carroll MD, Kit BK, Ogden CL. Prevalence of obesity and trends in the distribution of  
392 body mass index among US adults, 1999-2010. *JAMA* 2012;307(5):491-7 doi:  
393 10.1001/jama.2012.39[published Online First: Epub Date]].
- 394 6. Statistics ABo. Australian Health Survey: First Results, 2011-12. Canberra: Australian Bureau of  
395 Statistics, 2012.
- 396 7. Dunstan DW, Zimmet PZ, Welborn TA, et al. The Australian Diabetes, Obesity and Lifestyle Study  
397 (AusDiab)--methods and response rates. *Diabetes Res Clin Pract* 2002;57(2):119-29
- 398 8. Cameron AJ, Welborn TA, Zimmet PZ, et al. Overweight and obesity in Australia: the 1999-2000  
399 Australian Diabetes, Obesity and Lifestyle Study (AusDiab). *Med J Aust* 2003;178(9):427-32
- 400 9. Risk Factor Prevalence Management Committee. Risk factor prevalence study No.3, 1989:  
401 National Heart Foundation and Australian Institute of Health, 1990.
- 402 10. Williams ED, Magliano DJ, Zimmet PZ, et al. Area-level socioeconomic status and incidence of  
403 abnormal glucose metabolism: the Australian Diabetes, Obesity and Lifestyle (AusDiab)  
404 study. *Diabetes Care* 2012;35(7):1455-61 doi: 10.2337/dc11-1410[published Online First:  
405 Epub Date]].
- 406 11. Statistics ABo. Information Paper - Census of Population and Housing: Socio-Economic Indexes  
407 for Areas Australia 2001. : Australian Bureau of Statistics, 2001.
- 408 12. Australian Institute of Health and Welfare. The Active Australia Survey. A guide and manual for  
409 implementation, analysis and reporting. Canberra: Australian Institute of Health and  
410 Welfare, 2003.
- 411 13. Armstrong T, Bauman A, Davies J. Physical activity patterns of Australian adults. Results of the  
412 1999 National Physical Activity Survey. Australian Institute of Health and Welfare cat No  
413 CVD10. Canberra: Australian Institute of Health and Welfare, 2000.
- 414 14. Salmon J, Bauman A, Crawford D, Timperio A, Owen N. The association between television  
415 viewing and overweight among Australian adults participating in varying levels of leisure-  
416 time physical activity. *Int. J. Obes. Relat. Metab. Disord.* 2000;24:600-6
- 417 15. Ireland P, Jolley D, Giles G, et al. Development of the Melbourne FFQ: A food frequency  
418 questionnaire for use in an Australian prospective study involving an ethnically diverse  
419 cohort. *Asia Pacific J Clin Nutr* 1994;3:19-31
- 420 16. Briganti EM, Shaw JE, Chadban SJ, et al. Untreated hypertension among Australian adults: the  
421 1999-2000 Australian Diabetes, Obesity and Lifestyle Study (AusDiab). *Med J Aust*  
422 2003;179(3):135-9
- 423 17. Magliano DJ, Barr EL, Zimmet PZ, et al. Glucose indices, health behaviors, and incidence of  
424 diabetes in Australia: the Australian Diabetes, Obesity and Lifestyle Study. *Diabetes Care*  
425 2008;31(2):267-72 doi: 10.2337/dc07-0912[published Online First: Epub Date]].

- 1  
2  
3 426 18. Hebert JR, Hurley TG, Peterson KE, et al. Social desirability trait influences on self-reported  
4 427 dietary measures among diverse participants in a multicenter multiple risk factor trial. *J Nutr*  
5 428 2008;138(1):226S-34S  
6 429 19. Booth ML, Owen N, Bauman AE, Gore CJ. Retest reliability of recall measures of leisure-time  
7 430 physical activity in Australian adults. *Int J Epidemiol* 1996;25(1):153-9  
8 431 20. Dodd KW, Guenther PM, Freedman LS, et al. Statistical methods for estimating usual intake of  
9 432 nutrients and foods: a review of the theory. *J Am Diet Assoc* 2006;106(10):1640-50 doi:  
10 433 10.1016/j.jada.2006.07.011[published Online First: Epub Date]].  
11 434 21. Elobeid MA, Desmond RA, Thomas O, Keith SW, Allison DB. Waist circumference values are  
12 435 increasing beyond those expected from BMI increases. *Obesity (Silver Spring)*  
13 436 2007;15(10):2380-3 doi: 15/10/2380 [pii]10.1038/oby.2007.282[published Online First: Epub  
14 437 Date]].  
15  
16 438 22. Walls HL, Stevenson CE, Mannan HR, et al. Comparing trends in BMI and waist circumference.  
17 439 *Obesity (Silver Spring)* 2011;19(1):216-9 doi: oby2010149 [pii  
18 440 10.1038/oby.2010.149[published Online First: Epub Date]].  
19  
20 441 23. Welborn TA, Dhaliwal SS, Bennett SA. Waist-hip ratio is the dominant risk factor predicting  
21 442 cardiovascular death in Australia. *Med J Aust* 2003;179(11-12):580-5  
22 443 24. Backholer K, Mannan HR, Magliano D, et al. Projected socioeconomic disparities in the  
23 444 prevalence of obesity amongst Australian adults. *Australian and New Zealand Journal of*  
24 445 *Public Health* 2012;in press  
25  
26  
27 446  
28  
29 447  
30  
31  
32  
33  
34  
35  
36  
37  
38  
39  
40  
41  
42  
43  
44  
45  
46  
47  
48  
49  
50  
51  
52  
53  
54  
55  
56  
57  
58  
59  
60

1  
2  
3  
4  
5  
6  
7  
8  
9  
10  
11  
12  
13  
14  
15  
16  
17  
18  
19  
20  
21  
22  
23  
24  
25  
26  
27  
28  
29  
30  
31  
32  
33  
34  
35  
36  
37  
38  
39  
40  
41  
42  
43  
44  
45  
46  
47  
48  
49  
50  
51  
52  
53  
54  
55  
56  
57  
58  
59  
60

448

449 Figures

450 Figure 1. Difference in annualised change in weight (kg/year) or waist circumference

451 (cm/year) between Period 2 and Period 1, by age and sex. Adjusted for age.

452

453

454

455

456

For peer review only

1  
2  
3 457 Tables  
4  
5

6 458 Table 1 Comparison of characteristics in 1999/2000 between the included and excluded  
7

8 459 population  
9  
10

| Baseline characteristics                      | Included    | Excluded    |
|-----------------------------------------------|-------------|-------------|
| n                                             | 3351        | 7896        |
| Sex (% men)                                   | 45          | 45          |
| Age (mean, y)*                                | 49 (11)     | 52 (16)     |
| Education (% post high school)*               | 67          | 56          |
| Area-level disadvantage (% in lowest tertile) | 25          | 36          |
| Born in Australia or New Zealand (%)          | 80          | 74          |
| Never smoker (%)*                             | 63          | 51          |
| Weight (mean, kg)                             | 76 (16)     | 78 (17)     |
| Waist circumference (mean, cm)                | 89 (13)     | 92 (14)     |
| Energy intake (mean, kj/day)                  | 8225 (3112) | 8137 (3566) |
| TV viewing time (mean, minutes/week)          | 703 (512)   | 829 (613)   |
| Exercise Time (mean, minutes/week)            | 283 (329)   | 269 (332)   |
| Diabetes (%)*                                 | 4.9         | 10.1        |
| Coronary heart disease (%)*                   | 2           | 5           |
| Hypertension (%)                              | 23          | 29          |
| High blood cholesterol (%)                    | 26          | 25          |

11  
12  
13  
14  
15  
16  
17  
18  
19  
20  
21  
22  
23  
24  
25  
26  
27  
28  
29  
30  
31  
32  
33  
34  
35  
36  
37  
38 460 Notes: data are % or mean (SD) \*Indicates a significant difference (p<0.05)  
39  
40  
41  
42  
43  
44  
45  
46  
47  
48  
49  
50  
51  
52  
53  
54  
55  
56  
57  
58  
59  
60

Table 2 Characteristics of the cohort in 1999/2000 and 2005

| Cross-sectional characteristics        | 2000        | 2005        |
|----------------------------------------|-------------|-------------|
| Age (mean, y)*                         | 49.3 (11.1) | 54.3 (11.1) |
| Weight (mean, kg)                      | 76.2 (15.6) | 77.9 (16.3) |
| Waist circumference (mean, cm)         | 89.4 (13.4) | 91.6 (13.6) |
| Smoking status (% never)               | 63          | 61          |
| Diabetes (%)                           | 4.9         | 6.4         |
| Exercise time (mean, minutes/week)*    | 283 (330)   | 306 (338)   |
| TV time (mean, minutes/week)*          | 703 (512)   | 764 (539)   |
| Energy intake (mean, kj/day)*          | 8225 (3112) | 7681 (2998) |
| Changes during follow-up               | Period 1    | Period 2    |
| Weight change (mean, kg)               | 1.7 (5.2)   | 0.9 (6.1)   |
| Waist circumference change (mean, cm)  | 2.1 (6.2)   | 3.2 (6.9)   |
| Follow-up (mean, y)*                   | 5.0 (0.15)  | 6.9 (0.34)  |
| Proportion gaining weight (%)*         | 64.5        | 56.8        |
| Annualised weight change (mean, kg/y)* | 0.34 (1.04) | 0.13 (0.89) |
| Annualised WC change (mean, cm/y)      | 0.43 (1.25) | 0.46 (1.00) |

Notes: Data are % or mean (SD) \*Indicates a significant difference (p<0.05)

Table 3 Change in Period 2 compared to Period 1 in annualised weight change (kg/year) (A); and waist circumference change (cm/year) (B)

(A)

|                                          | Sample size | Annualised weight change in Period 1 | Change in Period 2 compared to change in Period 1 |                      |                      |
|------------------------------------------|-------------|--------------------------------------|---------------------------------------------------|----------------------|----------------------|
|                                          |             |                                      | Model 1                                           | Model 2              | Model 3              |
| Total Population                         | 3351        | 0.34 (0.30-0.37)                     | -0.11 (-0.15--0.06)*                              | -0.10 (-0.15--0.06)* | -0.10 (-0.15--0.06)* |
| Men                                      | 1503        | 0.29 (0.24-0.34)                     | -0.08 (-0.14--0.01)*                              | -0.07 (-0.14--0.01)* | -0.08 (-0.15--0.01)* |
| Women                                    | 1848        | 0.37 (0.32-0.42)                     | -0.13 (-0.20--0.07)*                              | -0.13 (-0.19--0.06)* | -0.13 (-0.19--0.06)* |
| Age<55                                   | 2311        | 0.46 (0.41-0.50)                     | -0.12 (-0.19--0.06)*                              | -0.12 (-0.18--0.06)* | -0.13 (-0.19--0.06)* |
| Age>=55                                  | 1040        | 0.07 (0.01-0.12)                     | -0.08 (-0.15--0.02)*                              | -0.08 (-0.15--0.01)* | -0.07 (-0.14--0.01)* |
| Education- secondary & trade certificate | 2073        | 0.34 (0.30-0.39)                     | -0.13 (-0.19--0.07)*                              | -0.13 (-0.19--0.07)* | -0.13 (-0.19--0.07)* |
| Education- diploma & degree              | 1278        | 0.32 (0.27-0.38)                     | -0.07 (-0.14-0.00)                                | -0.07 (-0.14-0.00)   | -0.06 (-0.14-0.01)   |
| Area level disadvantage- tertile of most | 1096        | 0.31 (0.24-0.37)                     | -0.01 (-0.09-0.07)                                | -0.01 (-0.09-0.07)   | -0.01 (-0.10-0.07)   |

|    |                          |      |                  |                          |                      |
|----|--------------------------|------|------------------|--------------------------|----------------------|
| 1  |                          |      |                  |                          |                      |
| 2  |                          |      |                  |                          |                      |
| 3  |                          |      |                  |                          |                      |
| 4  |                          |      |                  |                          |                      |
| 5  | disadvantage             |      |                  |                          |                      |
| 6  | Area level disadvantage- |      |                  |                          |                      |
| 7  | middle tertile           | 1130 | 0.40 (0.34-0.47) | -0.23 (-0.31--<br>0.14)* | -0.22 (-0.31--0.14)* |
| 8  |                          |      |                  |                          |                      |
| 9  | Area level disadvantage- |      |                  |                          |                      |
| 10 | tertile of least         | 1125 | 0.30 (0.24-0.35) | -0.08 (-0.16--<br>0.01)* | -0.08 (-0.15--0.00)* |
| 11 | disadvantage             |      |                  |                          |                      |
| 12 | Normal weight            |      |                  |                          |                      |
| 13 |                          | 1342 | 0.4 (0.36-0.44)  | -0.07 (-0.13--<br>0.01)* | -0.07 (-0.13--0.01)* |
| 14 |                          |      |                  |                          |                      |
| 15 | Overweight               |      |                  |                          |                      |
| 16 |                          | 1375 | 0.31 (0.26-0.37) | -0.12 (-0.18--<br>0.05)* | -0.11 (-0.18--0.04)* |
| 17 |                          |      |                  |                          |                      |
| 18 | Obese                    | 633  | 0.25 (0.14-0.36) | -0.13 (-0.26-0.01)*      | -0.13 (-0.26-0.01)*  |
| 19 |                          |      |                  |                          |                      |
| 20 | English speaking         |      |                  |                          |                      |
| 21 | country of birth         | 3129 | 0.34 (0.30-0.37) | -0.10 (-0.15--<br>0.06)* | -0.1 (-0.15--0.05)*  |
| 22 |                          |      |                  |                          |                      |
| 23 | Non-English speaking     | 222  | 0.32 (0.18-0.46) | -0.15 (-0.32-0.02)       | -0.14 (-0.32-0.04)   |
| 24 | country of birth         |      |                  |                          |                      |
| 25 | Never smokers            |      |                  |                          |                      |
| 26 |                          | 2121 | 0.34 (0.29-0.38) | -0.10 (-0.15--<br>0.04)* | -0.1 (-0.15--0.04)*  |
| 27 |                          |      |                  |                          |                      |
| 28 | Ex smokers               |      |                  |                          |                      |
| 29 |                          | 894  | 0.27 (0.20-0.34) | -0.15 (-0.24--<br>0.06)* | -0.15 (-0.24--0.06)* |
| 30 |                          |      |                  |                          |                      |
| 31 | Current smokers          | 336  | 0.49 (0.36-0.63) | -0.01 (-0.20-0.19)       | 0.00 (-0.20-0.20)    |
| 32 |                          |      |                  |                          |                      |
| 33 | No chronic disease#      |      |                  |                          |                      |
| 34 |                          | 1944 | 0.42 (0.37-0.47) | -0.10 (-0.16--<br>0.04)* | -0.10 (-0.16--0.04)* |
| 35 |                          |      |                  |                          |                      |
| 36 |                          |      |                  |                          |                      |
| 37 |                          |      |                  |                          |                      |
| 38 |                          |      |                  |                          |                      |
| 39 |                          |      |                  |                          |                      |
| 40 |                          |      |                  |                          |                      |
| 41 |                          |      |                  |                          |                      |
| 42 |                          |      |                  |                          |                      |
| 43 |                          |      |                  |                          |                      |
| 44 |                          |      |                  |                          |                      |
| 45 |                          |      |                  |                          |                      |
| 46 |                          |      |                  |                          |                      |
| 47 |                          |      |                  |                          |                      |
| 48 |                          |      |                  |                          |                      |
| 49 |                          |      |                  |                          |                      |

1  
2  
3  
4  
5  
6  
7  
8  
9  
10  
11  
12  
13  
14  
15  
16  
17  
18  
19  
20  
21  
22  
23  
24  
25  
26  
27  
28  
29  
30  
31  
32  
33  
34  
35  
36  
37  
38  
39  
40  
41  
42  
43  
44  
45  
46  
47  
48  
49

|                                                           | Sample size | Annualised WC change<br>in Period 1 | Model 1                  | Model 2                  | Model 3                  |
|-----------------------------------------------------------|-------------|-------------------------------------|--------------------------|--------------------------|--------------------------|
| Chronic disease#                                          | 1407        | 0.25 (0.20-0.30)                    | -0.12 (-0.19--<br>0.05)* | -0.11 (-0.19--0.04)*     | -0.10 (-0.17--0.02)*     |
| (B)                                                       |             |                                     |                          |                          |                          |
| Total Population                                          | 3351        | 0.43 (0.39-0.48)                    | 0.07 (0.02-0.12)*        | 0.07 (0.02-0.13)*        | 0.07 (0.01-0.12)*        |
| Men                                                       | 1503        | 0.32 (0.26-0.38)                    | 0.13 (0.05-0.20)*        | 0.13 (0.06-0.21)*        | 0.12 (0.05-0.20)*        |
| Women                                                     | 1848        | 0.53 (0.47-0.59)                    | 0.02 (-0.06-0.10)        | 0.03 (-0.05-0.11)        | 0.02 (-0.05-0.10)        |
| Age<55                                                    | 2311        | 0.50 (0.45-0.55)                    | 0.05 (-0.03-0.12)        | 0.05 (-0.02-0.13)        | 0.05 (-0.03-0.12)        |
| Age>=55                                                   | 1040        | 0.28 (0.21-0.35)                    | 0.10 (0.02-0.18)*        | 0.10 (0.02-0.19)*        | 0.10 (0.02-0.18)*        |
| Education- secondary & trade<br>certificate               | 2073        | 0.44 (0.39-0.49)                    | 0.09 (0.02-0.15)*        | 0.09 (0.02-0.16)*        | 0.08 (0.01-0.15)*        |
| Education- diploma & degree                               | 1278        | 0.43 (0.36-0.50)                    | 0.05 (-0.04-0.14)        | 0.05 (-0.04-0.14)        | 0.05 (-0.04-0.14)        |
| Area level disadvantage- tertile<br>of most disadvantage  | 1096        | 0.41 (0.34-0.49)                    | 0.13 (0.04-0.23)*        | 0.13 (0.04-0.23)*        | 0.14 (0.04-0.23)*        |
| Area level disadvantage-<br>middle tertile                | 1130        | 0.32 (0.24-0.40)                    | 0.21 (0.11-0.31)*        | 0.22 (0.12-0.32)*        | 0.22 (0.12-0.32)*        |
| Area level disadvantage- tertile<br>of least disadvantage | 1125        | 0.57 (0.50-0.64)                    | -0.14 (-0.23--<br>0.05)* | -0.13 (-0.22--<br>0.05)* | -0.15 (-0.23--<br>0.06)* |



1  
2  
3  
4  
5  
6  
7  
8  
9  
10  
11  
12  
13  
14  
15  
16  
17  
18  
19  
20  
21  
22  
23  
24  
25  
26  
27  
28  
29  
30  
31  
32  
33  
34  
35  
36  
37  
38  
39  
40  
41  
42  
43  
44  
45  
46  
47  
48  
49

|                                       |      |                  |                   |                   |                   |
|---------------------------------------|------|------------------|-------------------|-------------------|-------------------|
| Normal weight                         | 1342 | 0.48 (0.42-0.54) | 0.04 (-0.04-0.12) | 0.04 (-0.04-0.12) | 0.03 (-0.05-0.12) |
| Overweight                            | 1375 | 0.43 (0.36-0.49) | 0.08 (-0.01-0.16) | 0.08 (-0.00-0.17) | 0.07 (-0.02-0.15) |
| Obese                                 | 633  | 0.35 (0.24-0.46) | 0.12 (-0.01-0.26) | 0.13 (-0.00-0.27) | 0.11 (-0.02-0.25) |
| English speaking country of birth     | 3129 | 0.44 (0.40-0.48) | 0.06 (0.01-0.12)* | 0.07 (0.01-0.13)* | 0.06 (0.01-0.12)* |
| Non-English speaking country of birth | 222  | 0.35 (0.18-0.52) | 0.17 (-0.04-0.38) | 0.18 (-0.02-0.39) | 0.17 (-0.03-0.38) |
| Never smokers                         | 2121 | 0.44 (0.39-0.49) | 0.07 (0.00-0.14)* | 0.07 (0.01-0.14)* | 0.07 (0.00-0.14)* |
| Ex smokers                            | 894  | 0.38 (0.30-0.46) | 0.04 (-0.06-0.14) | 0.04 (-0.06-0.14) | 0.03 (-0.08-0.13) |
| Current smokers                       | 336  | 0.56 (0.40-0.71) | 0.17 (-0.05-0.39) | 0.17 (-0.05-0.40) | 0.18 (-0.04-0.41) |
| Chronic disease <sup>1</sup>          | 1944 | 0.47 (0.41-0.52) | 0.06 (-0.01-0.13) | 0.07 (-0.01-0.14) | 0.07 (-0.01-0.14) |
| No chronic disease <sup>1</sup>       | 1407 | 0.44 (0.39-0.49) | 0.08 (-0.00-0.17) | 0.09 (0.00-0.17)* | 0.1 (0.01-0.18)*  |

Model 1- adjusting for age and sex

Model 2- additionally adjusting for smoking status, education status, area-level disadvantage and ethnicity

Model 3- additionally adjusting for baseline BMI and diabetes status

\* indicates p<0.05

<sup>1</sup> Chronic disease refers to any of coronary heart disease, cholesterol, hypertension, or diabetes at baseline

Figure 1. Difference in annualised change in weight (kg/year) or waist circumference (cm/year) between Period 2 and Period 1, by age and sex. Adjusted for age.

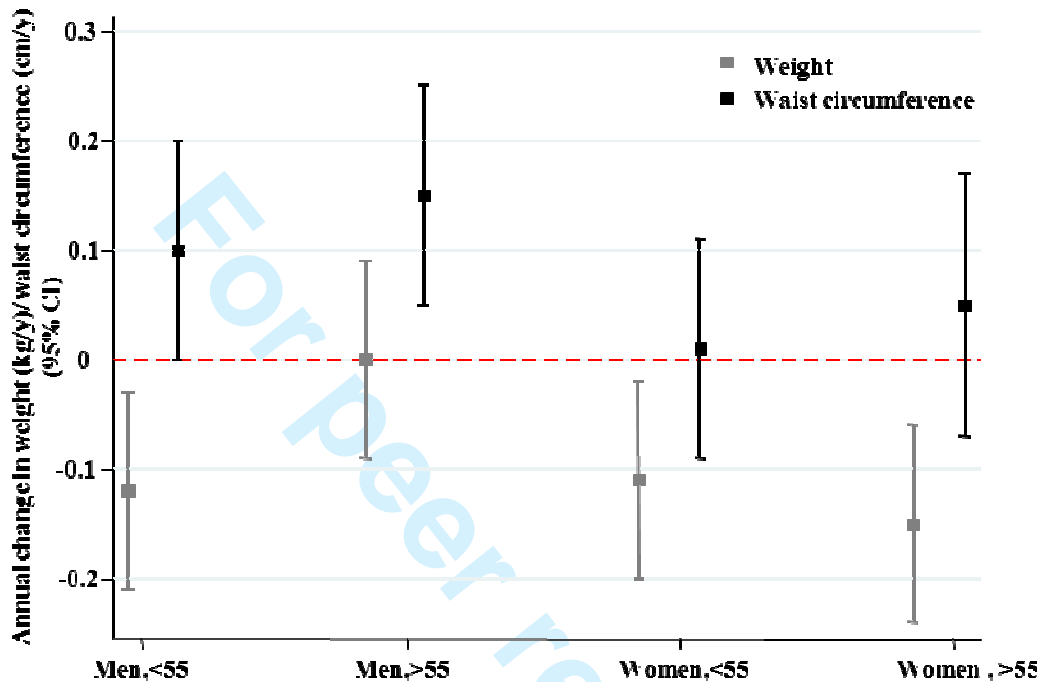

1  
2  
3  
4  
5  
6  
7  
8  
9  
10  
11  
12  
13  
14  
15  
16  
17  
18  
19  
20  
21  
22  
23  
24  
25  
26  
27  
28  
29  
30  
31  
32  
33  
34  
35  
36  
37  
38  
39  
40  
41  
42  
43  
44  
45  
46  
47  
48  
49  
50  
51  
52  
53  
54  
55  
56  
57  
58  
59  
60

Appendix

Figure 1 Annualised weight and waist circumference change in Period 1 and Period 2

A. Annualised weight change

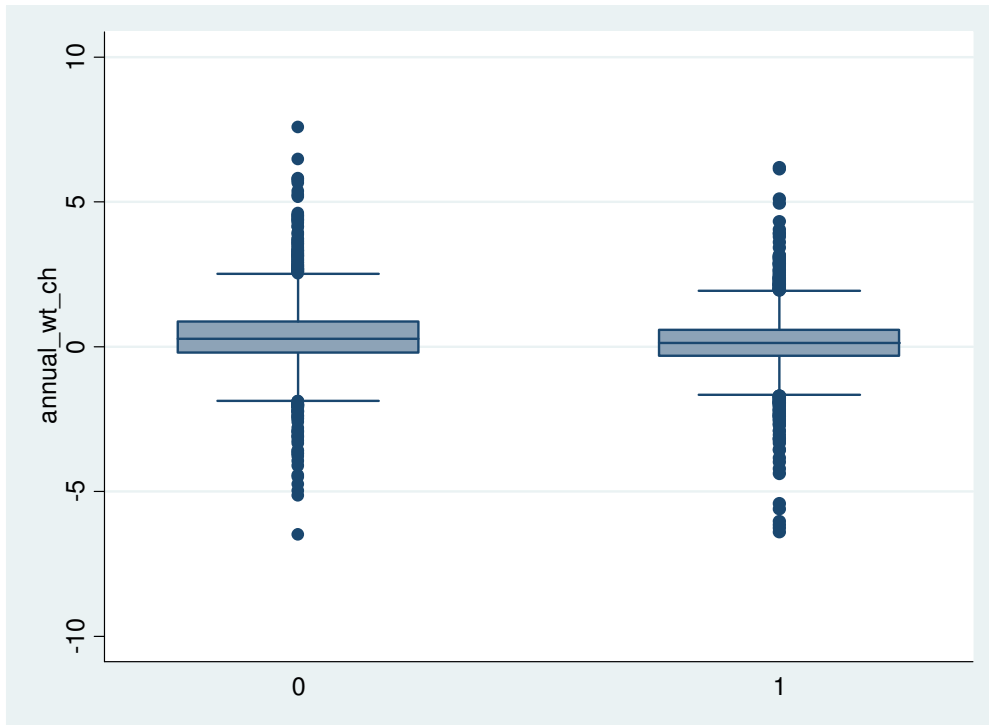

B. Annualised waist circumference change

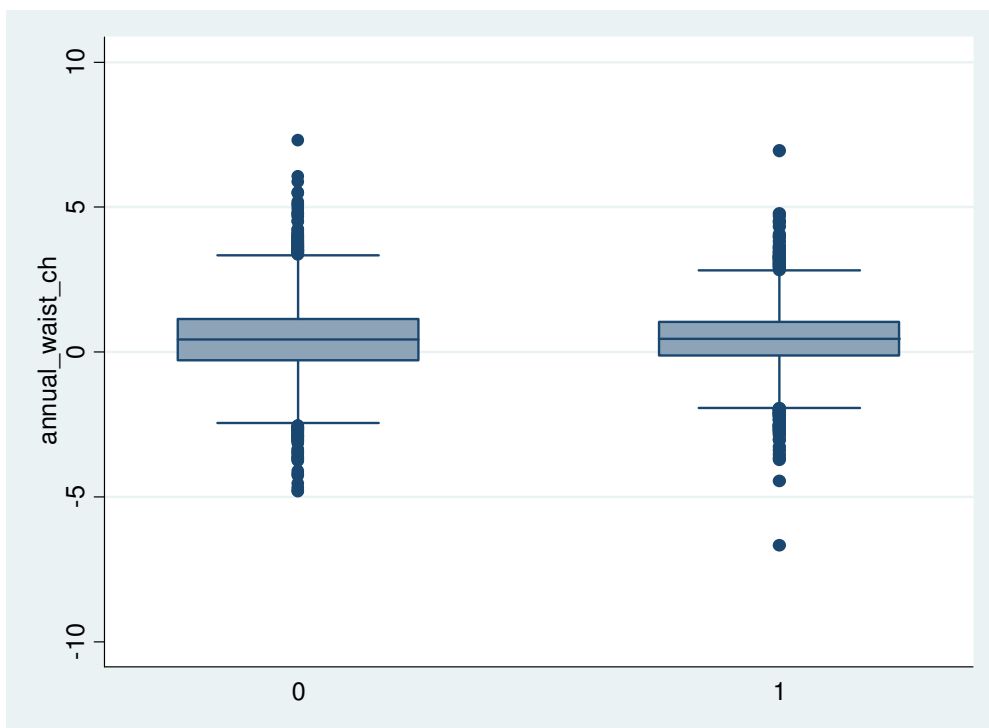

Table 1 Comparison of annualised weight and waist circumference change between Period 1 and Period 2 for matching age groups.

| Sex   | Age group | Difference in annualised weight change | Difference in annualised WC change |
|-------|-----------|----------------------------------------|------------------------------------|
| Men   | 25-34     | -0.08 (-0.5, 0.35)                     | -0.10 (-0.53, 0.32)                |
|       | 35-44     | -0.18 (-0.34, -0.02)*                  | 0.12 (-0.06, 0.30)                 |
|       | 45-54     | -0.10 (-0.22, 0.01)                    | 0.13 (0.01, 0.26)                  |
|       | 55-64     | -0.03 (-0.1, 0.16)                     | 0.20 (0.05, 0.34)                  |
|       | 65-74     | -0.12 (-0.26, 0.02)                    | 0.05 (-0.12, 0.23)                 |
|       | 75+       | 0.27 (-0.10, 0.65)                     | 0.26 (-0.19, 0.72)                 |
| Women | 25-34     | -0.08 (-0.46, 0.31)                    | -0.05 (-0.47, 0.37)                |
|       | 35-44     | -0.12 (-0.26, 0.03)                    | -0.02 (-0.19, 0.16)                |
|       | 45-54     | -0.15 (-0.26, -0.04)*                  | -0.01 (-0.14, 0.12)                |
|       | 55-64     | -0.09 (-0.20, 0.02)                    | 0.08 (-0.07, 0.23)                 |
|       | 65-74     | -0.34 (-0.50, -0.17)*                  | -0.08 (-0.31, 0.16)                |
|       | 75+       | 0.02 (-0.37, 0.41)                     | 0.27 (-0.32, .85)                  |

\*Indicates a significant difference ( $p < 0.05$ )

1 Changes in the rates of weight and waist circumference gain in Australian adults over time.

2

3 Anna Peeters (Head, Obesity and Population Health)<sup>1</sup>, Dianna J Magliano (Head, Diabetes  
4 and Population Health)<sup>1</sup>, Kathryn Backholer (Research Fellow)<sup>1</sup>, Paul Zimmet (Emeritus  
5 Director)<sup>1</sup>, Jonathan E Shaw (Director, Clinical Epidemiology and Diabetes)<sup>1</sup>

6 <sup>1</sup> Baker IDI Heart and Diabetes Institute, Melbourne 3004, Victoria, Australia

7

8 Running title: Change in weight and waist gain over time

9

10 Corresponding author:

11 Anna Peeters

12 Obesity and Population Health

13 Baker IDI Heart and Diabetes Institute

14 Commercial Rd

15 Melbourne 3004

16 Australia

17 Phone: +61 3 8532 1928

18 Email: [anna.peeters@bakeridi.edu.au](mailto:anna.peeters@bakeridi.edu.au)

19

1  
2  
3 20 *Data sharing*  
4  
5

6 21 Extra data is available by emailing A Peeters at [anna.peeters@bakeridi.edu.au](mailto:anna.peeters@bakeridi.edu.au)  
7  
8  
9 22

10  
11  
12 23 *Authorship statement*  
13  
14

15 24 AP conceived of the article, executed the analysis and writing of the article and is guarantor  
16  
17 25 for the article. JS, DM and KB contributed to the ideas included within and writing of the  
18  
19 26 article, and provision of data. PZ contributed to the writing of the article and provision of  
20  
21 27 data.  
22  
23  
24  
25 28

26  
27  
28 29 *Funding*  
29  
30

31 30 This work was supported by VicHealth (Fellowship, AP), the Australian National Preventive  
32  
33 31 Health Agency (Project grant) and Australia Research Council (ARC-linkage grant  
34  
35 32 LP12010041). J.E.S. is supported by a National Health and Medical Research Council  
36  
37 33 Fellowship (586623).  
38

39 34 The AusDiab study, co-coordinated by the Baker IDI Heart and Diabetes Institute, was  
40  
41 35 supported in part by the Victorian Government's OIS Program, and gratefully acknowledges  
42  
43 36 the generous support given by: National Health and Medical Research Council (NHMRC  
44  
45 37 grant 233200), Australian Government Department of Health and Ageing. Abbott Australasia  
46  
47 38 Pty Ltd, Alphapharm Pty Ltd, AstraZeneca, Bristol-Myers Squibb, City Health Centre-  
48  
49 39 Diabetes Service-Canberra, Department of Health and Community Services - Northern  
50  
51 40 Territory, Department of Health and Human Services – Tasmania, Department of Health –  
52  
53 41 New South Wales, Department of Health – Western Australia, Department of Health – South  
54  
55 42 Australia, Department of Human Services – Victoria, Diabetes Australia, Diabetes Australia  
56  
57  
58  
59  
60

- 1  
2  
3 43 Northern Territory, Eli Lilly Australia, Estate of the Late Edward Wilson, GlaxoSmithKline,  
4  
5 44 Jack Brockhoff Foundation, Janssen-Cilag, Kidney Health Australia, Marian & FH Flack  
6  
7 45 Trust, Menzies Research Institute, Merck Sharp & Dohme, Novartis Pharmaceuticals, Novo  
8  
9 46 Nordisk Pharmaceuticals, Pfizer Pty Ltd, Pratt Foundation, Queensland Health, Roche  
10  
11 47 Diagnostics Australia, Royal Prince Alfred Hospital, Sydney, Sanofi Aventis, Sanofi  
12  
13  
14 48 Synthelabo.  
15  
16  
17  
18  
19  
20  
21  
22  
23  
24  
25  
26  
27  
28  
29  
30  
31  
32  
33  
34  
35  
36  
37  
38  
39  
40  
41  
42  
43  
44  
45  
46  
47  
48  
49  
50  
51  
52  
53  
54  
55  
56  
57  
58  
59  
60



1  
2  
3 49 *Article summary*  
4  
5

6 50 *Article focus*  
7  
8

- 9 • We aimed to assess in a single cohort whether change in weight and waist  
10  
11 circumference has changed in recent time periods, **independent of age**.  
12  
13

14 53 *Key messages*  
15  
16

- 17 • Between 2004/5–2011/2, Australian adults in this national cohort study continued to  
18  
19 gain weight, but more slowly than 1999/2000–2004/5.  
20  
21

- 22 • In contrast waist circumference gain was greater in the most recent period. Important  
23  
24 differences were observed according to area-level **socio-economic** disadvantage.  
25  
26

- 27 • **While weight gain may be slowing, this has not been observed for older men or**  
28  
29 **those in more disadvantaged groups.**  
30  
31  
32

33 60 *Strengths and limitations*  
34  
35

- 36 • Reliably measured data in a single nationally representative cohort in recent time  
37  
38 periods  
39  
40

- 41 • **Analyses adjusted and matched for age for comparison between Periods to**  
42  
43 **enable analysis of changes over time, rather than age**  
44  
45

- 46 • Selection and response bias may limit the generalisability of the results to the broader  
47  
48 Australian population  
49  
50  
51

52 67  
53  
54  
55  
56  
57  
58  
59  
60

68 **ABSTRACT**

69 Objective: To assess in a single cohort whether annual weight and waist circumference (WC)  
70 change has varied over time.

71 Design: Longitudinal cohort study with three surveys, 1 – 1999/2000; 2 – 2004/2005; 3 –  
72 2011/2012. Generalized linear mixed models with random effects were used to compare  
73 **annualised** weight and WC change between surveys 1 and 2 (Period 1) with that between  
74 surveys 2 and 3 (Period 2). **Models were adjusted for age to analyse changes with time**  
75 **rather than age**. Models were additionally adjusted for sex, education status, area-level  
76 **socio-economic** disadvantage, ethnicity, body mass index, diabetes status, and smoking  
77 status.

78 Setting: The Australian Diabetes, Obesity and Lifestyle study (AusDiab) - a population-  
79 based, stratified-cluster survey of 11, 247 adults aged  $\geq 25$  years.

80 Participants: 3,351 Australian adults who attended each of three surveys and had complete  
81 measures of weight, WC and covariates.

82 Primary outcome measures: Weight and WC were measured according to standard protocols  
83 at each survey. **Change in weight and WC was annualised for comparison between the**  
84 **two Periods.**

85 Results: Mean weight and WC increased in both Periods. **Annualised** weight gain in Period  
86 2 was 0.11kg/year (95% CI 0.06–0.15) less than in Period 1. **Lesser** annual weight gain  
87 between the two periods was not seen for those with greatest area-level **socio-economic**  
88 disadvantage, or in men over the age of 55. In contrast, the **annualised** WC increase in  
89 Period 2 was greater than in Period 1 (0.07cm/year, 95% CI 0.01–0.12). **The increase was**  
90 **greatest in males 55+ and those with greater area-level socio-economic disadvantage.**

1  
2  
3 91 Conclusions: Between 2004/5–2011/2, Australian adults in a national study continued to gain  
4  
5 92 weight, but more slowly than 1999/2000–2004/5. **While weight gain may be slowing, it**  
6  
7 93 **does not appear to be affecting older men or those in more disadvantaged groups, and**  
8  
9  
10 94 **the same cannot be said for WC.**

11  
12  
13 95  
14  
15  
16  
17  
18  
19  
20  
21  
22  
23  
24  
25  
26  
27  
28  
29  
30  
31  
32  
33  
34  
35  
36  
37  
38  
39  
40  
41  
42  
43  
44  
45  
46  
47  
48  
49  
50  
51  
52  
53  
54  
55  
56  
57  
58  
59  
60

For peer review only

1  
2  
3 96 Obesity in adults has increased rapidly over the past few decades, leading to prevalence of  
4  
5 97 over one quarter in many developed countries [1]. There is growing acceptance that strong  
6  
7 98 preventive measures are required to stem the increasing prevalence, with a variety of  
8  
9  
10 99 approaches implemented, ranging from social marketing through whole of community  
11  
12 100 interventions to regulatory strategies.

13  
14  
15 101 There have been some suggestions that obesity prevention interventions in children have had  
16  
17 102 a positive effect, due to the observation that the prevalence of obesity is no longer increasing  
18  
19 103 at the same rate [2] [3]. A recent review of 52 studies, from 25 countries, comparing obesity  
20  
21 104 prevalence at two time points since 1999 [4] concluded that in more developed nations a  
22  
23 105 likely slowing of the rate of increase in obesity prevalence was occurring in children, with a  
24  
25 106 possible turning point around 2000. However, trends in adults in this review generally  
26  
27 107 appeared to be continuing to increase. Since this review, an analysis of US adults through the  
28  
29 108 repeated National Health and Nutrition Examination Surveys (NHANES) between 1999 and  
30  
31 109 2010 suggested no increase in mean body mass index (BMI) or obesity prevalence over that  
32  
33 110 time period in non-Hispanic white and Hispanic women, but continued increases in men and  
34  
35 111 non-Hispanic black and Mexican American women [5]. In Australia, the latest reported data  
36  
37 112 suggests a continued increase in obesity prevalence in adults to 2012 [6]. However,  
38  
39 113 prevalence data is driven by a range of factors, including migration, mortality and response  
40  
41 114 bias. To determine whether the degree of weight gain in the population has slowed over time,  
42  
43 115 a comparison of the rates of weight change is required.  
44  
45  
46  
47  
48

49 116 We aimed to analyse whether the degree of change in weight and waist circumference (WC)  
50  
51 117 over time differed in a single cohort of adults, comparing weight and WC change in the same  
52  
53 118 individuals between two consecutive time periods, **adjusting for age**. We used the national  
54  
55 119 Australian Diabetes, Obesity and Lifestyle cohort (AusDiab) [7], and compared **annualised**  
56  
57 120 change in weight and WC between 2000 and 2005 to that between 2005 and 2012.  
58  
59  
60

1  
2  
3 121 **METHODS**  
4  
5

6 122 **Setting and Participants**  
7

8  
9 123 The Australian Diabetes, Obesity and Lifestyle study (AusDiab) is a population-based,  
10  
11 124 stratified-cluster survey of 11, 247 adults aged  $\geq 25$  years, recruited in 1999 -2000  
12  
13 125 (AusDiab1). Methods and response rates have been described previously[7]. Five-year  
14  
15 126 follow-up was conducted in 2004-2005 (AusDiab2) and a 12-year follow-up was conducted  
16  
17 127 in 2012 (AusDiab3). From the original cohort, 6,400 and 4,614 returned for physical  
18  
19 128 examination and interviewer-administered questionnaire at AusDiab2 and AusDiab3,  
20  
21 129 respectively. For this analysis we excluded participants with missing data on weight or WC  
22  
23 130 at any of AusDiab 1, 2 or 3, leaving 3,908 participants. We further excluded those  
24  
25 131 participants missing any of the variables used as covariates at AusDiab 1 or 2, resulting in a  
26  
27 132 final sample size of 3,351. Ethics approval was obtained from the International Diabetes  
28  
29 133 Institute, Monash University, and the Alfred Hospital Melbourne. All participants consented  
30  
31 134 to participate in the study.  
32  
33  
34

35  
36 135 All study assessments followed a similar protocol [8] [7]. Data were collected by  
37  
38 136 interviewer-administered questionnaires on medical history, lifestyle and health behaviour.  
39  
40

41 137 **Outcomes**  
42

43  
44 138 Height was measured without shoes, using a stadiometer and recorded to the nearest 0.5 cm.  
45  
46 139 Weight was measured without shoes, excess clothing, and items in pockets by a single  
47  
48 140 measurement at each survey. Weight at AusDiab1 was measured using a mechanical beam  
49  
50 141 balance. Weight at AusDiab 2 and 3 was measured using digital weighing scales. Weight was  
51  
52 142 recorded to the nearest 0.1 kg. At all surveys, scales were calibrated using 5kg weights prior  
53  
54 143 to each set of measurements. BMI was obtained from the calculation of weight (kg) divided  
55  
56  
57  
58  
59  
60

1  
2  
3 144 by height (m<sup>2</sup>). Annual weight change was calculated as the difference in weight between  
4  
5 145 AusDiab 1 and 2 (Period 1), or AusDiab 2 and 3 (Period 2), divided by the follow-up time  
6  
7 146 between the two consecutive surveys.  
8  
9

10 147 Waist circumference was measured twice, halfway between the lower border of the ribs and  
11  
12 148 the iliac crest on a horizontal plane. If measurements varied by >2 cm, a third was taken; the  
13  
14 149 mean of the two closest measurements was calculated. **Annualised** WC change was  
15  
16 150 calculated as the difference in WC between AusDiab 1 and 2, or AusDiab 2 and 3, divided by  
17  
18 151 the follow-up time between the two consecutive surveys.  
19  
20  
21

## 22 152 **Co-factors**

23  
24  
25 153 Data on education, country of birth, smoking and physical activity and television  
26  
27 154 viewing habits were obtained by questionnaire. Self-reported cardiovascular disease was  
28  
29 155 ascertained by asking if participants had been told by a doctor or nurse that they had angina,  
30  
31 156 myocardial infarction, or stroke.  
32  
33  
34

35 157 Smoking status was defined as 1) current daily smoker and 2) ex-smoker (smoking less than  
36  
37 158 daily for at least the last 3 months, but used to smoke daily) and non-smoker (never smoked  
38  
39 159 tobacco daily) combined [9] [7].  
40  
41

42 160 Education level was ascertained by asking the question “Which of these describes the highest  
43  
44 161 qualification you have received?” Education was categorised as secondary only (comprising  
45  
46 162 those with a secondary school qualification), diploma (comprising nursing or teaching  
47  
48 163 qualification, trade certificate or undergraduate diploma), and degree (comprising bachelor  
49  
50 164 degree, post-graduate diploma or masters degree/doctorate)[10].  
51  
52  
53

54 165 Area-level **socio-economic** disadvantage was estimated using the Index of Relative  
55  
56 166 Disadvantage code from the Socio-economic Indexes for Areas (SEIFA). The index was  
57  
58  
59  
60

1  
2  
3 167 developed by the Australian Bureau of Statistics, to create a summary measure from a group  
4  
5 168 of 20 variables (related to education, income, employment, family composition, housing  
6  
7 169 benefits, car ownership, ethnicity, English language proficiency, residential overcrowding)  
8  
9  
10 170 displaying dimensions of social disadvantage [11]. The index is constructed so that high  
11  
12 171 values reflect areas with high socio-economic status (relative advantage) and low values  
13  
14 172 reflect areas with low socio-economic status (relative disadvantage). Tertiles of disadvantage  
15  
16 173 were calculated amongst the final study sample.

17  
18  
19 174 Physical activity was measured via an interviewer-administered Active Australia  
20  
21 175 questionnaire, which considered participation in predominantly leisure-time physical  
22  
23 176 activities (including walking for transport) during the previous week [12]. Total physical  
24  
25 177 activity time was calculated as the sum of the time spent walking (if continuous and for  $\geq 10$   
26  
27 178 minutes) or performing moderate-intensity activity, plus double the time spent in vigorous-  
28  
29 179 intensity physical activity [13].

30  
31  
32  
33 180 Self-reported television viewing time was calculated as the total time spent watching  
34  
35 181 television or videos in the previous week, and is considered a reliable and valid estimate of  
36  
37 182 television viewing time among adults [14].

38  
39  
40  
41 183 Average daily energy intake was assessed using a self-administered food frequency  
42  
43 184 questionnaire (FFQ) [15], which included 74 items (with 10 frequency options), with  
44  
45 185 additional questions on food habits, portion size and consumption of alcoholic beverages. In  
46  
47 186 AusDiab1, blood pressure was measured using a standard mercury sphygmomanometer in the  
48  
49 187 state of Victoria only and by Dinamap elsewhere. To account for any effect due to differential  
50  
51 188 measurement error, manual blood pressure measurements were adjusted as previously  
52  
53 189 described [16]. In AusDiab 2 and 3, blood pressure was measured by an Omron machine.  
54  
55  
56  
57  
58  
59  
60

1  
2  
3 190 Fasting serum total cholesterol was measured with an Olympus AU600 analyser (Olympus  
4  
5 191 Optical, Tokyo, Japan) at a central laboratory [17].  
6  
7

8 192 Classification of diabetes status has been described elsewhere [17]. Briefly, participants were  
9  
10 193 classified as having 'known diabetes' if they reported having doctor diagnosed diabetes and  
11  
12 194 were either taking hypoglycaemic medication or had fasting plasma glucose (FPG)  
13  
14 195  $\geq 7.0$ mmol/L or a 2-hour plasma glucose (PG)  $\geq 11.1$ mmol/L. Participants not reporting  
15  
16 196 diabetes but with FPG  $\geq 7.0$ mmol/L or 2-hour PG  $\geq 11.1$ mmol/L were classified as having  
17  
18 197 'newly diagnosed diabetes'.  
19

## 20 198 **Statistical analysis**

21  
22  
23 199 Baseline characteristics (means and proportions at AusDiab1) were compared between  
24  
25 200 AusDiab participants with and without complete measures at AusDiab 1, 2 and 3.  
26  
27 201 Characteristics of the included population were also compared in 2000 and 2005,  
28  
29 202 representing the two baseline surveys for the two weight change periods.  
30  
31

32 203 The difference in **annualised** weight and WC change in Period 1 (2000 to 2005), compared  
33  
34 204 to Period 2 (2005 and 2012), was assessed using linear regression analysis. Generalized linear  
35  
36 205 mixed models with random effects were used to analyse the association between study period  
37  
38 206 on annual weight or WC change. This model includes random effects associated with both  
39  
40 207 the cluster and the units of analysis (participants) to take the clustered structure of the data  
41  
42 208 into account and to allow the residuals associated with the longitudinal measures on the same  
43  
44 209 unit of analysis to be correlated. Models were adjusted sequentially for age and sex, (Model  
45  
46 210 1), additionally adjusting for smoking, education, area level disadvantage and country of birth  
47  
48 211 (Model 2), additionally adjusting for baseline BMI and diabetes status (Model 3), and  
49  
50 212 additionally adjusting for baseline TV time, exercise time, and energy intake (Model 4).  
51  
52 213 Baseline refers to the variables measured at AusDiab1 for change in Period 1, and AusDiab2  
53  
54 214 for change in Period 2. **Adjustment for age enables the differences in weight and WC**  
55  
56  
57  
58  
59  
60



1  
2  
3 215 **change observed between the two Periods to be attributed to time rather than age.** The  
4  
5 216 association between study period and **annualised** weight and WC change was also analysed  
6  
7 217 across sub-groups and interaction terms between study period with age or sex were analysed.  
8  
9 218 The primary analyses were repeated after excluding the few participants with annual weight  
10  
11 219 change greater than 5 kg/y or less than -5 kg/y, and restricting participants to the overlapping  
12  
13 220 age group of 30–80.  
14  
15  
16 221 All analyses were performed in STATA (version 11.0), with statistical significance set at the  
17  
18 222 5% level.  
19  
20  
21 223

224 **RESULTS**

225 The population with complete measures was similar to the total AusDiab cohort with respect  
226 to sex and weight, but was younger, with higher educational attainment, and a higher  
227 prevalence of never smoking (Table 1). The population with complete measures also had a  
228 lower prevalence of chronic disease. There was no appreciable difference between the two  
229 groups for weight change in Period 1 after adjustment for differences in age and sex.

230 (Table 1 here)

231 Participant characteristics in 2000 and 2005 were compared (Table 2). In 2005, in addition to  
232 being five years older, the population had a higher prevalence of diabetes (predominantly  
233 type 2). In both periods the average change in weight and WC was a gain. In Period 2, a  
234 smaller proportion of the population gained weight and **annualised** weight gain was less, at  
235 0.13 kg/year compared to 0.34 kg/year in Period 1. This difference resulted from a lesser  
236 weight change across the entire distribution of weight change in Period 2, with minimal  
237 difference at the 5<sup>th</sup> percentile, increasing to a difference of 0.50kg/year at the 95<sup>th</sup> percentile  
238 of weight change (Appendix Figure 1A). For WC, there was no difference in the crude  
239 **annualised** change between the two periods (Table 2). In contrast to weight change, this  
240 resulted from both a smaller gain in those whose WC increased and a smaller loss in those  
241 whose WC decreased (Appendix Figure 1B). The correlation between weight and WC change  
242 was 0.69 (0.68 in Period 1, and 0.71 in Period 2).

243 (Table 2 here)

244 Comparison of the crude **annualised** weight change for matching 10-year age-groups in  
245 Periods 1 and 2 indicated a smaller weight gain in Period 2 for most age and sex groups,  
246 although these differences were only significant for men aged 35–44, and women 45–54 and

1  
2  
3 247 65–74 (Appendix Table 1). Comparison of the crude **annualised** WC change for matching  
4  
5 248 age-groups in Periods 1 and 2 indicated no difference in WC gain between the two periods  
6  
7 249 for women and a generally larger WC gain in Period 2 for men (significant for men aged 45–  
8  
9  
10 250 54 and 55–64; Appendix Table 1).

11  
12 251 The difference in **annualised** weight and WC change in Period 2, compared to Period 1, was  
13  
14 252 assessed using linear regression analysis (Table 3A). In Period 2, **annualised** weight gain  
15  
16 253 was 0.11 kg/year (95% CI 0.06, 0.15) less than in Period 1. This did not alter substantially  
17  
18 254 after further adjustment for smoking status, education status, ethnicity, area-level **socio-**  
19  
20 255 **economic** disadvantage, baseline BMI and diabetes status (Table 3A), nor after adjustment  
21  
22 256 for TV time, exercise time and energy intake (results not shown).

23  
24  
25  
26  
27 257 **Annualised** weight gain in Period 2 was less than in Period 1 for most sub-groups (Table  
28  
29 258 3A), with suggestions of a greater difference over time in women, and those aged under 55  
30  
31 259 years (although no interaction tests on these factors were significant). Annualised weight gain  
32  
33 260 in Period 2 was non-significantly less than in Period 1 for those with high educational  
34  
35 261 attainment (borderline significant), obesity, and those from a non-English speaking  
36  
37 262 background. No difference in **annualised** weight gain between the two periods was observed  
38  
39 263 for those in the tertile of greatest area-level **socio-economic** disadvantage, nor for current  
40  
41 264 smokers.

42  
43  
44  
45 265 In Period 2, **annualised** WC gain was 0.07 cm/year more than in Period 1 (Table 3B). This  
46  
47 266 did not alter substantially after further adjustment for smoking status, education status, area-  
48  
49 267 level **socio-economic** disadvantage, ethnicity, baseline BMI and diabetes status (Table 3B),  
50  
51 268 nor after adjustment for TV time, exercise time and energy intake (results not shown).

52  
53  
54  
55 269 In stratified analyses no difference in **annualised** WC gain between the two periods was  
56  
57 270 observed for women, those aged <55 years, those in the highest education group, those with  
58  
59  
60

1  
2  
3 271 normal weight nor ex-smokers. **Annualised** WC gain was less in Period 2 than Period 1 for  
4  
5 272 those in the tertile of least area-level **socio-economic** disadvantage (-0.14cm/year 95%CI -  
6  
7 273 .05, -0.23).

8  
9  
10 274 (Table 3 here)

11  
12  
13 275 For both weight and WC, there was an apparent combined sex and age effect, such that older  
14  
15 276 men had the least favourable changes over time (Figure 1).

16  
17  
18 277 The primary analyses were repeated after excluding the few participants with annual weight  
19  
20 278 change greater than 5 kg/y or less than -5 kg/y, and restricting participants to the overlapping  
21  
22 279 age group of 30–80. No differences in results were seen.

23  
24  
25  
26 280

27  
28  
29 281

## 30 31 32 282 **DISCUSSION**

33  
34  
35 283 In this analysis of a single cohort of Australian adults, weight and WC increased in the most  
36  
37 284 recent period in all population sub-groups examined. **Age-adjusted annualised** weight gain  
38  
39 285 between 2005–2012 was less than between 1999/2000–2005, but **annualised** WC gain was  
40  
41 286 greater. **Lesser weight gain** over time was not seen in older men or those with greatest area-  
42  
43 287 level **socio-economic** disadvantage.

44  
45  
46  
47 288

48  
49  
50 289 The lack of difference in weight and WC change between the two periods observed for  
51  
52 290 current smokers, those from a non-English speaking background and those with obesity, is  
53  
54 291 likely to reflect small sample sizes in these groups. In general, adjustment for covariates had  
55  
56 292 little effect on the observed associations between study period and weight and WC change.

1  
2  
3 293 As time spent watching TV, exercise and energy intake might be expected to be mediating  
4  
5 294 much of the observed changes, we had expected **an observable reduction in the difference**  
6  
7 295 **between study periods** after adjustment for these factors. The lack of impact after  
8  
9 296 adjustment likely reflects that they are relatively blunt instruments to detect small changes in  
10  
11 297 behaviour over time. **The self-reported nature of these behavioural questionnaires is**  
12  
13 298 **associated with both differential and non-differential error [18] [19]. While validated,**  
14  
15 299 **the FFQ is has a limited list of foods and is affected by the inability of individuals to**  
16  
17 300 **accurately report their food intake retrospectively over a long period of time [20].**  
18  
19 301 **Further the Active Australia questionnaire only refers to leisure time activity and TV**  
20  
21 302 **watching is only one component of sitting time.**  
22  
23 303  
24 304 The general observation that weight gain may be lessening over time supports the cross-  
25  
26 305 sectional time series observations of a plateau in the prevalence of obesity and rate of change  
27  
28 306 in BMI [4]. However, these results also suggest that the general observations do not tell the  
29  
30 307 whole story, with large differences between different population subgroups, and a contrasting  
31  
32 308 observation for waist circumference. The sex differences observed here are similar to the  
33  
34 309 cross-sectional trends reported for American adults for whom a clear plateau in obesity  
35  
36 310 prevalence has been observed for women but not men [5]. The differences we observed  
37  
38 311 according to level of area-level **socio-economic** disadvantage also reflect findings from the  
39  
40 312 review of obesity trends in which the levelling off of obesity was generally more pronounced  
41  
42 313 in groups with higher socio-economic position [4]. **It will be important to do a similar**  
43  
44 314 **analysis in a longitudinal children's cohort, as their experience is likely to differ from**  
45  
46 315 **that of adults. Children have been exposed to a wide range of obesity prevention**  
47  
48 316 **interventions, particularly in schools, in countries such as Australia and cross-sectional**  
49  
50 317 **trends clearly suggest a plateauing in the prevalence of obesity in children [4].**  
51  
52  
53  
54  
55  
56  
57  
58  
59  
60

1  
2  
3 318 The observation that rates of WC change may be continuing to increase even as rates of  
4  
5 319 weight change decrease may reflect prior findings using the NHANES data that WC is  
6  
7 320 increasing to a greater extent than expected from changes in weight [21] [22]. While we  
8  
9 321 observed changes in weight and WC to be highly correlated these results combined suggest a  
10  
11 322 preferential increase in abdominal adiposity over time, which is thought to be associated with  
12  
13 323 greater risk of cardio-metabolic outcomes [23]. The potential implication that current  
14  
15 324 bodyweight trends are leading a more metabolically active obesity, with increased risks for  
16  
17 325 outcomes such as diabetes, hypertension and cardiovascular disease warrants further  
18  
19 326 investigation.

20  
21  
22  
23  
24 327 The key strength of the current study is that for the first time it addresses this important  
25  
26 328 question through an analysis of the same cohort of adults over two distinct but recent time  
27  
28 329 periods, **independent of the effects of ageing**. In doing this, conclusions can be drawn about  
29  
30 330 the changes over time independent of unmeasurable differences in cohorts. Other strengths  
31  
32 331 include the national population sampling strategy of the AusDiab cohort and the measured  
33  
34 332 weight and WC at each study wave.

35  
36  
37  
38 333 The potential limitation of the current study is the lack of generalisability of the included  
39  
40 334 cohort. As with all cohort studies, the AusDiab cohort is a selected population, and those who  
41  
42 335 attended all three waves are more select again, with higher educational attainment and a  
43  
44 336 lower prevalence of chronic disease and risk factors. It is possible that a generally more  
45  
46 337 healthy and health conscious population has a stronger response to population health  
47  
48 338 messages, and consequently the **lesser weight gain observed here in consecutive age**  
49  
50 339 **cohorts over time** may be greater than would be observed for the general population.  
51  
52 340 However, the current observations lend support to the concept that weight gain is decreasing  
53  
54 341 over time in the population, even if the AusDiab cohort represents a particularly sensitive  
55  
56 342 indicator. One further potential limitation is the use of different weighing scales at AusDiab 2  
57  
58  
59  
60

1  
2  
3 343 and 3 compared to AusDiab1. **Although all scales were calibrated in the same way at each**  
4  
5 344 **survey wave, differences in variability between the scales may have led to more**  
6  
7 345 **variability in the change in weight in Period 1 than Period 2.**  
8  
9

10 346 The results also suggest there is no room for complacency in obesity prevention. The rates of  
11  
12 347 overweight and obesity remain high, the average change in weight and WC remains an  
13  
14 348 increase and there is no reduction in the **rate of WC** gain. Further, no **decrease** in the rate of  
15  
16 349 weight or WC change were observed in older men. Finally, the observation that no **decrease**  
17  
18 350 in rates of weight and WC change is being seen by those living in the most socially  
19  
20 351 disadvantaged neighbourhoods suggests current trends are likely to lead to an increase in the  
21  
22 352 social inequalities in obesity, and consequent ill health [24]. It is critical that further studies  
23  
24 353 are conducted to confirm these findings and that we work to identify the causes of the  
25  
26 354 observed changes, **including the differences observed in specific** population sub-groups.  
27  
28  
29  
30

31 355 In summary, between 2004/5 and 2011/2 Australian adults continued to gain weight: WC at a  
32  
33 356 faster rate than between 1999/2000 and 2004/4, and weight at a slower rate. **While weight**  
34  
35 357 **gain may be slowing, it does not appear to be affecting older men or those in more**  
36  
37 358 **disadvantaged groups, and the same cannot be said for WC.**  
38  
39  
40

41 359

42  
43  
44 360

45  
46  
47 361

48  
49  
50 362

1  
2  
3 363 **Acknowledgements**  
4

5 364 The authors would like to acknowledge all AusDiab participants, investigators and sponsors.  
6

7 365 The authors would like to acknowledge Parneet Sethi for useful discussions on this work.  
8

9  
10 366  
11  
12  
13  
14  
15  
16  
17  
18  
19  
20  
21  
22  
23  
24  
25  
26  
27  
28  
29  
30  
31  
32  
33  
34  
35  
36  
37  
38  
39  
40  
41  
42  
43  
44  
45  
46  
47  
48  
49  
50  
51  
52  
53  
54  
55  
56  
57  
58  
59  
60

For peer review only



367 **References**

- 368 1. International Association for the Study of Obesity. Obesity the global epidemic. Secondary Obesity  
369 the global epidemic 2013. <http://www.iaso.org/iotf/obesity/obesitytheglobalepidemic/>.
- 370 2. Stamatakis E, Zaninotto P, Falaschetti E, Mindell J, Head J. Time trends in childhood and  
371 adolescent obesity in England from 1995 to 2007 and projections of prevalence to 2015. *J*  
372 *Epidemiol Community Health* 2010;**64**(2):167-74 doi: 10.1136/jech.2009.098723[published  
373 Online First: Epub Date]].
- 374 3. Sundblom E, Petzold M, Rasmussen F, Callmer E, Lissner L. Childhood overweight and obesity  
375 prevalences levelling off in Stockholm but socioeconomic differences persist. *Int J Obes*  
376 (Lond) 2008;**32**(10):1525-30 doi: 10.1038/ijo.2008.104[published Online First: Epub Date]].
- 377 4. Rokholm B, Baker JL, Sorensen TI. The levelling off of the obesity epidemic since the year 1999--a  
378 review of evidence and perspectives. *Obes Rev* 2010;**11**(12):835-46 doi: 10.1111/j.1467-  
379 789X.2010.00810.x[published Online First: Epub Date]].
- 380 5. Flegal KM, Carroll MD, Kit BK, Ogden CL. Prevalence of obesity and trends in the distribution of  
381 body mass index among US adults, 1999-2010. *JAMA* 2012;**307**(5):491-7 doi:  
382 10.1001/jama.2012.39[published Online First: Epub Date]].
- 383 6. Statistics ABo. Australian Health Survey: First Results, 2011-12. Canberra: Australian Bureau of  
384 Statistics, 2012.
- 385 7. Dunstan DW, Zimmet PZ, Welborn TA, et al. The Australian Diabetes, Obesity and Lifestyle Study  
386 (AusDiab)--methods and response rates. *Diabetes Res Clin Pract* 2002;**57**(2):119-29
- 387 8. Cameron AJ, Welborn TA, Zimmet PZ, et al. Overweight and obesity in Australia: the 1999-2000  
388 Australian Diabetes, Obesity and Lifestyle Study (AusDiab). *Med J Aust* 2003;**178**(9):427-32
- 389 9. Risk Factor Prevalence Management Committee. Risk factor prevalence study No.3, 1989:  
390 National Heart Foundation and Australian Institute of Health, 1990.
- 391 10. Williams ED, Magliano DJ, Zimmet PZ, et al. Area-level socioeconomic status and incidence of  
392 abnormal glucose metabolism: the Australian Diabetes, Obesity and Lifestyle (AusDiab)  
393 study. *Diabetes Care* 2012;**35**(7):1455-61 doi: 10.2337/dc11-1410[published Online First:  
394 Epub Date]].
- 395 11. Statistics ABo. Information Paper - Census of Population and Housing: Socio-Economic Indexes  
396 for Areas Australia 2001. : Australian Bureau of Statistics, 2001.
- 397 12. Australian Institute of Health and Welfare. The Active Australia Survey. A guide and manual for  
398 implementation, analysis and reporting. Canberra: Australian Institute of Health and  
399 Welfare, 2003.
- 400 13. Armstrong T, Bauman A, Davies J. Physical activity patterns of Australian adults. Results of the  
401 1999 National Physical Activity Survey. Australian Institute of Health and Welfare cat No  
402 CVD10. Canberra: Australian Institute of Health and Welfare, 2000.
- 403 14. Salmon J, Bauman A, Crawford D, Timperio A, Owen N. The association between television  
404 viewing and overweight among Australian adults participating in varying levels of leisure-  
405 time physical activity. *Int. J. Obes. Relat. Metab. Disord.* 2000;**24**:600-6
- 406 15. Ireland P, Jolley D, Giles G, et al. Development of the Melbourne FFQ: A food frequency  
407 questionnaire for use in an Australian prospective study involving an ethnically diverse  
408 cohort. *Asia Pacific J Clin Nutr* 1994;**3**:19-31
- 409 16. Briganti EM, Shaw JE, Chadban SJ, et al. Untreated hypertension among Australian adults: the  
410 1999-2000 Australian Diabetes, Obesity and Lifestyle Study (AusDiab). *Med J Aust*  
411 2003;**179**(3):135-9
- 412 17. Magliano DJ, Barr EL, Zimmet PZ, et al. Glucose indices, health behaviors, and incidence of  
413 diabetes in Australia: the Australian Diabetes, Obesity and Lifestyle Study. *Diabetes Care*  
414 2008;**31**(2):267-72 doi: 10.2337/dc07-0912[published Online First: Epub Date]].

- 1  
2  
3 415 18. Hebert JR, Hurley TG, Peterson KE, et al. Social desirability trait influences on self-reported  
4 416 dietary measures among diverse participants in a multicenter multiple risk factor trial. *J Nutr*  
5 417 2008;**138**(1):226S-34S  
6 418 19. Booth ML, Owen N, Bauman AE, Gore CJ. Retest reliability of recall measures of leisure-time  
7 419 physical activity in Australian adults. *Int J Epidemiol* 1996;**25**(1):153-9  
8 420 20. Dodd KW, Guenther PM, Freedman LS, et al. Statistical methods for estimating usual intake of  
9 421 nutrients and foods: a review of the theory. *J Am Diet Assoc* 2006;**106**(10):1640-50 doi:  
10 422 10.1016/j.jada.2006.07.011[published Online First: Epub Date]].  
11 423 21. Elobeid MA, Desmond RA, Thomas O, Keith SW, Allison DB. Waist circumference values are  
12 424 increasing beyond those expected from BMI increases. *Obesity (Silver Spring)*  
13 425 2007;**15**(10):2380-3 doi: 15/10/2380 [pii]10.1038/oby.2007.282[published Online First: Epub  
14 426 Date]].  
15  
16 427 22. Walls HL, Stevenson CE, Mannan HR, et al. Comparing trends in BMI and waist circumference.  
17 428 *Obesity (Silver Spring)* 2011;**19**(1):216-9 doi: oby2010149 [pii  
18 429 10.1038/oby.2010.149[published Online First: Epub Date]].  
19  
20 430 23. Welborn TA, Dhaliwal SS, Bennett SA. Waist-hip ratio is the dominant risk factor predicting  
21 431 cardiovascular death in Australia. *Med J Aust* 2003;**179**(11-12):580-5  
22 432 24. Backholer K, Mannan HR, Magliano D, et al. Projected socioeconomic disparities in the  
23 433 prevalence of obesity amongst Australian adults. *Australian and New Zealand Journal of*  
24 434 *Public Health* 2012;**in press**

25  
26  
27 435

28  
29 436  
30  
31  
32  
33  
34  
35  
36  
37  
38  
39  
40  
41  
42  
43  
44  
45  
46  
47  
48  
49  
50  
51  
52  
53  
54  
55  
56  
57  
58  
59  
60

1  
2  
3  
4  
5  
6  
7  
8  
9  
10  
11  
12  
13  
14  
15  
16  
17  
18  
19  
20  
21  
22  
23  
24  
25  
26  
27  
28  
29  
30  
31  
32  
33  
34  
35  
36  
37  
38  
39  
40  
41  
42  
43  
44  
45  
46  
47  
48  
49  
50  
51  
52  
53  
54  
55  
56  
57  
58  
59  
60

437

438 **Figures**

439 Figure 1. Difference in **annualised** change in weight (kg/year) or waist circumference  
440 (cm/year) between Period 2 and Period 1, by age and sex. Adjusted for age.

441

442

443

444

445

For peer review only

446 **Tables**

447 **Table 1** Comparison of characteristics in 1999/2000 between the included and excluded  
 448 population

| Baseline characteristics                      | Included    | Excluded    |
|-----------------------------------------------|-------------|-------------|
| n                                             | 3351        | 7896        |
| Sex (% men)                                   | 45          | 45          |
| Age (mean, y)*                                | 49 (11)     | 52 (16)     |
| Education (% post high school)*               | 67          | 56          |
| Area-level disadvantage (% in lowest tertile) | 25          | 36          |
| Born in Australia or New Zealand (%)          | 80          | 74          |
| Never smoker (%)*                             | 63          | 51          |
| Weight (mean, kg)                             | 76 (16)     | 78 (17)     |
| Waist circumference (mean, cm)                | 89 (13)     | 92 (14)     |
| Energy intake (mean, kj/day)                  | 8225 (3112) | 8137 (3566) |
| TV viewing time (mean, minutes/week)          | 703 (512)   | 829 (613)   |
| Exercise Time (mean, minutes/week)            | 283 (329)   | 269 (332)   |
| Diabetes (%)*                                 | 4.9         | 10.1        |
| Coronary heart disease (%)*                   | 2           | 5           |
| Hypertension (%)                              | 23          | 29          |
| High blood cholesterol (%)                    | 26          | 25          |

449 Notes: data are % or mean (SD) \*Indicates a significant difference (p<0.05)

**Table 2** Characteristics of the cohort in 1999/2000 and 2005

| <b>Cross-sectional characteristics</b>        | <b>2000</b>     | <b>2005</b>     |
|-----------------------------------------------|-----------------|-----------------|
| Age (mean, y)*                                | 49.3 (11.1)     | 54.3 (11.1)     |
| Weight (mean, kg)                             | 76.2 (15.6)     | 77.9 (16.3)     |
| Waist circumference (mean, cm)                | 89.4 (13.4)     | 91.6 (13.6)     |
| Smoking status (% never)                      | 63              | 61              |
| Diabetes (%)                                  | 4.9             | 6.4             |
| Exercise time (mean, minutes/week)*           | 283 (330)       | 306 (338)       |
| TV time (mean, minutes/week)*                 | 703 (512)       | 764 (539)       |
| Energy intake (mean, kj/day)*                 | 8225 (3112)     | 7681 (2998)     |
| <b>Changes during follow-up</b>               | <b>Period 1</b> | <b>Period 2</b> |
| Weight change (mean, kg)                      | 1.7 (5.2)       | 0.9 (6.1)       |
| Waist circumference change (mean, cm)         | 2.1 (6.2)       | 3.2 (6.9)       |
| Follow-up (mean, y)*                          | 5.0 (0.15)      | 6.9 (0.34)      |
| Proportion gaining weight (%)*                | 64.5            | 56.8            |
| <b>Annualised</b> weight change (mean, kg/y)* | 0.34 (1.04)     | 0.13 (0.89)     |
| <b>Annualised</b> WC change (mean, cm/y)      | 0.43 (1.25)     | 0.46 (1.00)     |

Notes: Data are % or mean (SD) \*Indicates a significant difference (p<0.05)

Table 3 Change in Period 2 compared to Period 1 in **annualised** weight change (kg/year) (A); and waist circumference change (cm/year) (B)

(A)

|                                          | Sample size | Annualised weight change in Period 1 | Change in Period 2 compared to change in Period 1 |                      |                      |
|------------------------------------------|-------------|--------------------------------------|---------------------------------------------------|----------------------|----------------------|
|                                          |             |                                      | Model 1                                           | Model 2              | Model 3              |
| Total Population                         | 3351        | 0.34 (0.30-0.37)                     | -0.11 (-0.15--0.06)*                              | -0.10 (-0.15--0.06)* | -0.10 (-0.15--0.06)* |
| Men                                      | 1503        | 0.29 (0.24-0.34)                     | -0.08 (-0.14--0.01)*                              | -0.07 (-0.14--0.01)* | -0.08 (-0.15--0.01)* |
| Women                                    | 1848        | 0.37 (0.32-0.42)                     | -0.13 (-0.20--0.07)*                              | -0.13 (-0.19--0.06)* | -0.13 (-0.19--0.06)* |
| Age<55                                   | 2311        | 0.46 (0.41-0.50)                     | -0.12 (-0.19--0.06)*                              | -0.12 (-0.18--0.06)* | -0.13 (-0.19--0.06)* |
| Age>=55                                  | 1040        | 0.07 (0.01-0.12)                     | -0.08 (-0.15--0.02)*                              | -0.08 (-0.15--0.01)* | -0.07 (-0.14--0.01)* |
| Education- secondary & trade certificate | 2073        | 0.34 (0.30-0.39)                     | -0.13 (-0.19--0.07)*                              | -0.13 (-0.19--0.07)* | -0.13 (-0.19--0.07)* |
| Education- diploma & degree              | 1278        | 0.32 (0.27-0.38)                     | -0.07 (-0.14-0.00)                                | -0.07 (-0.14-0.00)   | -0.06 (-0.14-0.01)   |
| Area level disadvantage-tertile of most  | 1096        | 0.31 (0.24-0.37)                     | -0.01 (-0.09-0.07)                                | -0.01 (-0.09-0.07)   | -0.01 (-0.10-0.07)   |

|    |                          |      |                  |                          |                      |
|----|--------------------------|------|------------------|--------------------------|----------------------|
| 1  |                          |      |                  |                          |                      |
| 2  |                          |      |                  |                          |                      |
| 3  |                          |      |                  |                          |                      |
| 4  |                          |      |                  |                          |                      |
| 5  | disadvantage             |      |                  |                          |                      |
| 6  | Area level disadvantage- |      |                  |                          |                      |
| 7  | middle tertile           | 1130 | 0.40 (0.34-0.47) | -0.23 (-0.31--<br>0.14)* | -0.22 (-0.31--0.14)* |
| 8  |                          |      |                  |                          |                      |
| 9  | Area level disadvantage- |      |                  |                          |                      |
| 10 | tertile of least         | 1125 | 0.30 (0.24-0.35) | -0.08 (-0.16--<br>0.01)* | -0.08 (-0.15--0.00)* |
| 11 | disadvantage             |      |                  |                          |                      |
| 12 | Normal weight            |      |                  |                          |                      |
| 13 |                          | 1342 | 0.4 (0.36-0.44)  | -0.07 (-0.13--<br>0.01)* | -0.07 (-0.13--0.01)* |
| 14 |                          |      |                  |                          |                      |
| 15 | Overweight               |      |                  |                          |                      |
| 16 |                          | 1375 | 0.31 (0.26-0.37) | -0.12 (-0.18--<br>0.05)* | -0.11 (-0.18--0.04)* |
| 17 |                          |      |                  |                          |                      |
| 18 | Obese                    | 633  | 0.25 (0.14-0.36) | -0.13 (-0.26-0.01)*      | -0.13 (-0.26-0.01)*  |
| 19 |                          |      |                  |                          |                      |
| 20 | English speaking         |      |                  |                          |                      |
| 21 | country of birth         | 3129 | 0.34 (0.30-0.37) | -0.10 (-0.15--<br>0.06)* | -0.1 (-0.15--0.05)*  |
| 22 |                          |      |                  |                          |                      |
| 23 | Non-English speaking     | 222  | 0.32 (0.18-0.46) | -0.15 (-0.32-0.02)       | -0.14 (-0.32-0.04)   |
| 24 | country of birth         |      |                  |                          |                      |
| 25 | Never smokers            |      |                  |                          |                      |
| 26 |                          | 2121 | 0.34 (0.29-0.38) | -0.10 (-0.15--<br>0.04)* | -0.1 (-0.15--0.04)*  |
| 27 |                          |      |                  |                          |                      |
| 28 | Ex smokers               |      |                  |                          |                      |
| 29 |                          | 894  | 0.27 (0.20-0.34) | -0.15 (-0.24--<br>0.06)* | -0.15 (-0.24--0.06)* |
| 30 |                          |      |                  |                          |                      |
| 31 | Current smokers          | 336  | 0.49 (0.36-0.63) | -0.01 (-0.20-0.19)       | 0.00 (-0.20-0.20)    |
| 32 |                          |      |                  |                          |                      |
| 33 | No chronic disease#      |      |                  |                          |                      |
| 34 |                          | 1944 | 0.42 (0.37-0.47) | -0.10 (-0.16--<br>0.04)* | -0.10 (-0.16--0.04)* |
| 35 |                          |      |                  |                          |                      |
| 36 |                          |      |                  |                          |                      |
| 37 |                          |      |                  |                          |                      |
| 38 |                          |      |                  |                          |                      |
| 39 |                          |      |                  |                          |                      |
| 40 |                          |      |                  |                          |                      |
| 41 |                          |      |                  |                          |                      |
| 42 |                          |      |                  |                          |                      |
| 43 |                          |      |                  |                          |                      |
| 44 |                          |      |                  |                          |                      |
| 45 |                          |      |                  |                          |                      |
| 46 |                          |      |                  |                          |                      |
| 47 |                          |      |                  |                          |                      |
| 48 |                          |      |                  |                          |                      |
| 49 |                          |      |                  |                          |                      |

1  
2  
3  
4  
5  
6  
7  
8  
9  
10  
11  
12  
13  
14  
15  
16  
17  
18  
19  
20  
21  
22  
23  
24  
25  
26  
27  
28  
29  
30  
31  
32  
33  
34  
35  
36  
37  
38  
39  
40  
41  
42  
43  
44  
45  
46  
47  
48  
49

|                                                        | Sample size | Annualised WC change in Period 1 | Model 1              | Model 2              | Model 3              |
|--------------------------------------------------------|-------------|----------------------------------|----------------------|----------------------|----------------------|
| Chronic disease#                                       | 1407        | 0.25 (0.20-0.30)                 | -0.12 (-0.19--0.05)* | -0.11 (-0.19--0.04)* | -0.10 (-0.17--0.02)* |
| <i>(B)</i>                                             |             |                                  |                      |                      |                      |
| Total Population                                       | 3351        | 0.43 (0.39-0.48)                 | 0.07 (0.02-0.12)*    | 0.07 (0.02-0.13)*    | 0.07 (0.01-0.12)*    |
| Men                                                    | 1503        | 0.32 (0.26-0.38)                 | 0.13 (0.05-0.20)*    | 0.13 (0.06-0.21)*    | 0.12 (0.05-0.20)*    |
| Women                                                  | 1848        | 0.53 (0.47-0.59)                 | 0.02 (-0.06-0.10)    | 0.03 (-0.05-0.11)    | 0.02 (-0.05-0.10)    |
| Age<55                                                 | 2311        | 0.50 (0.45-0.55)                 | 0.05 (-0.03-0.12)    | 0.05 (-0.02-0.13)    | 0.05 (-0.03-0.12)    |
| Age>=55                                                | 1040        | 0.28 (0.21-0.35)                 | 0.10 (0.02-0.18)*    | 0.10 (0.02-0.19)*    | 0.10 (0.02-0.18)*    |
| Education- secondary & trade certificate               | 2073        | 0.44 (0.39-0.49)                 | 0.09 (0.02-0.15)*    | 0.09 (0.02-0.16)*    | 0.08 (0.01-0.15)*    |
| Education- diploma & degree                            | 1278        | 0.43 (0.36-0.50)                 | 0.05 (-0.04-0.14)    | 0.05 (-0.04-0.14)    | 0.05 (-0.04-0.14)    |
| Area level disadvantage- tertile of most disadvantage  | 1096        | 0.41 (0.34-0.49)                 | 0.13 (0.04-0.23)*    | 0.13 (0.04-0.23)*    | 0.14 (0.04-0.23)*    |
| Area level disadvantage- middle tertile                | 1130        | 0.32 (0.24-0.40)                 | 0.21 (0.11-0.31)*    | 0.22 (0.12-0.32)*    | 0.22 (0.12-0.32)*    |
| Area level disadvantage- tertile of least disadvantage | 1125        | 0.57 (0.50-0.64)                 | -0.14 (-0.23--0.05)* | -0.13 (-0.22--0.05)* | -0.15 (-0.23--0.06)* |



1  
2  
3  
4  
5  
6  
7  
8  
9  
10  
11  
12  
13  
14  
15  
16  
17  
18  
19  
20  
21  
22  
23  
24  
25  
26  
27  
28  
29  
30  
31  
32  
33  
34  
35  
36  
37  
38  
39  
40  
41  
42  
43  
44  
45  
46  
47  
48  
49

|                                       |      |                  |                   |                   |                   |
|---------------------------------------|------|------------------|-------------------|-------------------|-------------------|
| Normal weight                         | 1342 | 0.48 (0.42-0.54) | 0.04 (-0.04-0.12) | 0.04 (-0.04-0.12) | 0.03 (-0.05-0.12) |
| Overweight                            | 1375 | 0.43 (0.36-0.49) | 0.08 (-0.01-0.16) | 0.08 (-0.00-0.17) | 0.07 (-0.02-0.15) |
| Obese                                 | 633  | 0.35 (0.24-0.46) | 0.12 (-0.01-0.26) | 0.13 (-0.00-0.27) | 0.11 (-0.02-0.25) |
| English speaking country of birth     | 3129 | 0.44 (0.40-0.48) | 0.06 (0.01-0.12)* | 0.07 (0.01-0.13)* | 0.06 (0.01-0.12)* |
| Non-English speaking country of birth | 222  | 0.35 (0.18-0.52) | 0.17 (-0.04-0.38) | 0.18 (-0.02-0.39) | 0.17 (-0.03-0.38) |
| Never smokers                         | 2121 | 0.44 (0.39-0.49) | 0.07 (0.00-0.14)* | 0.07 (0.01-0.14)* | 0.07 (0.00-0.14)* |
| Ex smokers                            | 894  | 0.38 (0.30-0.46) | 0.04 (-0.06-0.14) | 0.04 (-0.06-0.14) | 0.03 (-0.08-0.13) |
| Current smokers                       | 336  | 0.56 (0.40-0.71) | 0.17 (-0.05-0.39) | 0.17 (-0.05-0.40) | 0.18 (-0.04-0.41) |
| Chronic disease <sup>1</sup>          | 1944 | 0.47 (0.41-0.52) | 0.06 (-0.01-0.13) | 0.07 (-0.01-0.14) | 0.07 (-0.01-0.14) |
| No chronic disease <sup>1</sup>       | 1407 | 0.44 (0.39-0.49) | 0.08 (-0.00-0.17) | 0.09 (0.00-0.17)* | 0.1 (0.01-0.18)*  |

Model 1- adjusting for age and sex

Model 2- additionally adjusting for smoking status, education status, area-level disadvantage and ethnicity

Model 3- additionally adjusting for baseline BMI and diabetes status

\* indicates p<0.05

<sup>1</sup> Chronic disease refers to any of coronary heart disease, cholesterol, hypertension, or diabetes at baseline

Figure 1. Difference in **annualised** change in weight (kg/year) or waist circumference (cm/year) between Period 2 and Period 1, by age and sex. Adjusted for age.

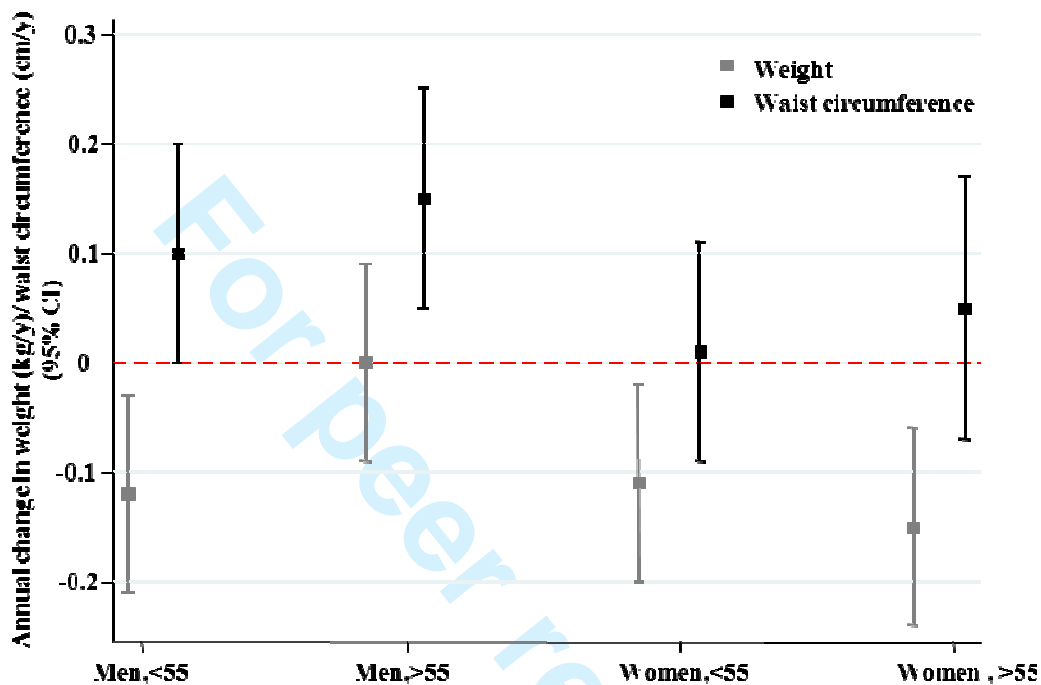

1  
2  
3  
4  
5  
6  
7  
8  
9  
10  
11  
12  
13  
14  
15  
16  
17  
18  
19  
20  
21  
22  
23  
24  
25  
26  
27  
28  
29  
30  
31  
32  
33  
34  
35  
36  
37  
38  
39  
40  
41  
42  
43  
44  
45  
46  
47  
48  
49  
50  
51  
52  
53  
54  
55  
56  
57  
58  
59  
60

Appendix

Figure 1 Annualised weight and waist circumference change in Period 1 and Period 2

A. Annualised weight change



B. **Annualised** waist circumference change



**Table 1** Comparison of **annualised** weight and waist circumference change between Period 1 and Period 2 for matching age groups.

| Sex   | Age group | Difference in <b>annualised</b> weight change | Difference in <b>annualised</b> WC change |
|-------|-----------|-----------------------------------------------|-------------------------------------------|
| Men   | 25-34     | -0.08 (-0.5, 0.35)                            | -0.10 (-0.53, 0.32)                       |
|       | 35-44     | -0.18 (-0.34, -0.02)*                         | 0.12 (-0.06, 0.30)                        |
|       | 45-54     | -0.10 (-0.22, 0.01)                           | 0.13 (0.01, 0.26)                         |
|       | 55-64     | -0.03 (-0.1, 0.16)                            | 0.20 (0.05, 0.34)                         |
|       | 65-74     | -0.12 (-0.26, 0.02)                           | 0.05 (-0.12, 0.23)                        |
|       | 75+       | 0.27 (-0.10, 0.65)                            | 0.26 (-0.19, 0.72)                        |
|       | Women     | 25-34                                         | -0.08 (-0.46, 0.31)                       |
| 35-44 |           | -0.12 (-0.26, 0.03)                           | -0.02 (-0.19, 0.16)                       |
| 45-54 |           | -0.15 (-0.26, -0.04)*                         | -0.01 (-0.14, 0.12)                       |
| 55-64 |           | -0.09 (-0.20, 0.02)                           | 0.08 (-0.07, 0.23)                        |
| 65-74 |           | -0.34 (-0.50, -0.17)*                         | -0.08 (-0.31, 0.16)                       |
| 75+   |           | 0.02 (-0.37, 0.41)                            | 0.27 (-0.32, .85)                         |

\*Indicates a significant difference (p<0.05)

Appendix

Figure 1 Annual weight and waist circumference change in Period 1 and Period 2

A. Annual weight change



1  
2  
3  
4  
5  
6  
7  
8  
9  
10  
11  
12  
13  
14  
15  
16  
17  
18  
19  
20  
21  
22  
23  
24  
25  
26  
27  
28  
29  
30  
31  
32  
33  
34  
35  
36  
37  
38  
39  
40  
41  
42  
43  
44  
45  
46  
47  
48  
49  
50  
51  
52  
53  
54  
55  
56  
57  
58  
59  
60

B. Annual waist circumference change



Review only

**Table 1** Comparison of annual weight and waist circumference change between Period 1 and Period 2 for matching age groups.

| Sex   | Age group | Difference in annual weight change | Difference in annual WC change |
|-------|-----------|------------------------------------|--------------------------------|
| Men   | 25-34     | -0.08 (-0.5, 0.35)                 | -0.10 (-0.53, 0.32)            |
|       | 35-44     | -0.18 (-0.34, -0.02)*              | 0.12 (-0.06, 0.30)             |
|       | 45-54     | -0.10 (-0.22, 0.01)                | 0.13 (0.01, 0.26)              |
|       | 55-64     | -0.03 (-0.1, 0.16)                 | 0.20 (0.05, 0.34)              |
|       | 65-74     | -0.12 (-0.26, 0.02)                | 0.05 (-0.12, 0.23)             |
|       | 75+       | 0.27 (-0.10, 0.65)                 | 0.26 (-0.19, 0.72)             |
|       | Women     | 25-34                              | -0.08 (-0.46, 0.31)            |
| 35-44 |           | -0.12 (-0.26, 0.03)                | -0.02 (-0.19, 0.16)            |
| 45-54 |           | -0.15 (-0.26, -0.04)*              | -0.01 (-0.14, 0.12)            |
| 55-64 |           | -0.09 (-0.20, 0.02)                | 0.08 (-0.07, 0.23)             |
| 65-74 |           | -0.34 (-0.50, -0.17)*              | -0.08 (-0.31, 0.16)            |
| 75+   |           | 0.02 (-0.37, 0.41)                 | 0.27 (-0.32, .85)              |

\*Indicates a significant difference ( $p < 0.05$ )



STROBE Statement—Checklist of items that should be included in reports of *cohort studies*

|                              | Item No | Recommendation                                                                                                                                                                               |
|------------------------------|---------|----------------------------------------------------------------------------------------------------------------------------------------------------------------------------------------------|
| <b>Title and abstract</b>    | 1       | (a) Indicate the study's design with a commonly used term in the title or the abstract YES                                                                                                   |
|                              |         | (b) Provide in the abstract an informative and balanced summary of what was done and what was found YES                                                                                      |
| <b>Introduction</b>          |         |                                                                                                                                                                                              |
| Background/rationale         | 2       | Explain the scientific background and rationale for the investigation being reported YES                                                                                                     |
| Objectives                   | 3       | State specific objectives, including any prespecified hypotheses YES                                                                                                                         |
| <b>Methods</b>               |         |                                                                                                                                                                                              |
| Study design                 | 4       | Present key elements of study design early in the paper YES                                                                                                                                  |
| Setting                      | 5       | Describe the setting, locations, and relevant dates, including periods of recruitment, exposure, follow-up, and data collection YES                                                          |
| Participants                 | 6       | (a) Give the eligibility criteria, and the sources and methods of selection of participants. Describe methods of follow-up YES,                                                              |
|                              |         | (b) For matched studies, give matching criteria and number of exposed and unexposed N/A                                                                                                      |
| Variables                    | 7       | Clearly define all outcomes, exposures, predictors, potential confounders, and effect modifiers. Give diagnostic criteria, if applicable YES                                                 |
| Data sources/<br>measurement | 8*      | For each variable of interest, give sources of data and details of methods of assessment (measurement). YES Describe comparability of assessment methods if there is more than one group N/A |
| Bias                         | 9       | Describe any efforts to address potential sources of bias YES                                                                                                                                |
| Study size                   | 10      | Explain how the study size was arrived at YES                                                                                                                                                |
| Quantitative variables       | 11      | Explain how quantitative variables were handled in the analyses. If applicable, describe which groupings were chosen and why YES                                                             |
| Statistical methods          | 12      | (a) Describe all statistical methods, including those used to control for confounding YES                                                                                                    |
|                              |         | (b) Describe any methods used to examine subgroups and interactions YES                                                                                                                      |
|                              |         | (c) Explain how missing data were addressed YES                                                                                                                                              |
|                              |         | (d) If applicable, explain how loss to follow-up was addressed YES                                                                                                                           |
|                              |         | (e) Describe any sensitivity analyses YES                                                                                                                                                    |

| <b>Results</b>           |     |                                                                                                                                                                                                                                                                                                                                                                                                                                   |
|--------------------------|-----|-----------------------------------------------------------------------------------------------------------------------------------------------------------------------------------------------------------------------------------------------------------------------------------------------------------------------------------------------------------------------------------------------------------------------------------|
| Participants             | 13* | (a) Report numbers of individuals at each stage of study—eg numbers potentially eligible, examined for eligibility, confirmed eligible, included in the study, completing follow-up, and analysed YES<br><br>(b) Give reasons for non-participation at each stage NOT DONE<br><br>(c) Consider use of a flow diagram NOT DONE                                                                                                     |
| Descriptive data         | 14* | (a) Give characteristics of study participants (eg demographic, clinical, social) and information on exposures and potential confounders YES<br><br>(b) Indicate number of participants with missing data for each variable of interest DONE IN AGGREGATE<br><br>(c) Summarise follow-up time (eg, average and total amount) YES                                                                                                  |
| Outcome data             | 15* | Report numbers of outcome events or summary measures over time YES                                                                                                                                                                                                                                                                                                                                                                |
| Main results             | 16  | (a) Give unadjusted estimates and, if applicable, confounder-adjusted estimates and their precision (eg, 95% confidence interval). Make clear which confounders were adjusted for and why they were included YES<br><br>(b) Report category boundaries when continuous variables were categorized N/A<br><br>(c) If relevant, consider translating estimates of relative risk into absolute risk for a meaningful time period N/A |
| Other analyses           | 17  | Report other analyses done—eg analyses of subgroups and interactions, and sensitivity analyses YES                                                                                                                                                                                                                                                                                                                                |
| <b>Discussion</b>        |     |                                                                                                                                                                                                                                                                                                                                                                                                                                   |
| Key results              | 18  | Summarise key results with reference to study objectives YES                                                                                                                                                                                                                                                                                                                                                                      |
| Limitations              | 19  | Discuss limitations of the study, taking into account sources of potential bias or imprecision. Discuss both direction and magnitude of any potential bias YES                                                                                                                                                                                                                                                                    |
| Interpretation           | 20  | Give a cautious overall interpretation of results considering objectives, limitations, multiplicity of analyses, results from similar studies, and other relevant evidence YES                                                                                                                                                                                                                                                    |
| Generalisability         | 21  | Discuss the generalisability (external validity) of the study results YES                                                                                                                                                                                                                                                                                                                                                         |
| <b>Other information</b> |     |                                                                                                                                                                                                                                                                                                                                                                                                                                   |
| Funding                  | 22  | Give the source of funding and the role of the funders for the present study and, if applicable, for the original study on which the present article is based YES                                                                                                                                                                                                                                                                 |

\*Give information separately for exposed and unexposed groups.

1  
2  
3  
4  
5  
6  
7  
8  
9  
10  
11  
12  
13  
14  
15  
16  
17  
18  
19  
20  
21  
22  
23  
24  
25  
26  
27  
28  
29  
30  
31  
32  
33  
34  
35  
36  
37  
38  
39  
40  
41  
42  
43  
44  
45  
46  
47  
48  
49  
50  
51  
52  
53  
54  
55  
56  
57  
58  
59  
60

**Note:** An Explanation and Elaboration article discusses each checklist item and gives methodological background and published examples of transparent reporting. The STROBE checklist is best used in conjunction with this article (freely available on the Web sites of PLoS Medicine at <http://www.plosmedicine.org/>, Annals of Internal Medicine at <http://www.annals.org/>, and Epidemiology at <http://www.epidem.com/>). Information on the STROBE Initiative is available at <http://www.strobe-statement.org>.

For peer review only



## Changes in the rates of weight and waist circumference gain in Australian adults over time

|                                 |                                                                                                                                                                                                                                                                                                                                                                                                                 |
|---------------------------------|-----------------------------------------------------------------------------------------------------------------------------------------------------------------------------------------------------------------------------------------------------------------------------------------------------------------------------------------------------------------------------------------------------------------|
| Journal:                        | <i>BMJ Open</i>                                                                                                                                                                                                                                                                                                                                                                                                 |
| Manuscript ID:                  | bmjopen-2013-003667.R2                                                                                                                                                                                                                                                                                                                                                                                          |
| Article Type:                   | Research                                                                                                                                                                                                                                                                                                                                                                                                        |
| Date Submitted by the Author:   | 03-Dec-2013                                                                                                                                                                                                                                                                                                                                                                                                     |
| Complete List of Authors:       | Peeters, Anna; Baker IDI Heart and Diabetes Institute, Obesity and Population Health; Baker IDI Heart and Diabetes Institute, Clinical Diabetes and Epidemiology<br>Magliano, Diana; Baker IDI Heart and Diabetes Institute,<br>Backholer, Kathryn; Baker IDI Heart and Diabetes Institute,<br>Zimmet, Paul; Baker IDI Heart and Diabetes Institute,<br>Shaw, Jonathan; Baker IDI Heart and Diabetes Institute, |
| <b>Primary Subject Heading</b>: | Public health                                                                                                                                                                                                                                                                                                                                                                                                   |
| Secondary Subject Heading:      | Epidemiology, Diabetes and endocrinology                                                                                                                                                                                                                                                                                                                                                                        |
| Keywords:                       | obesity, trends, cohort                                                                                                                                                                                                                                                                                                                                                                                         |
|                                 |                                                                                                                                                                                                                                                                                                                                                                                                                 |

SCHOLARONE™  
Manuscripts

1  
2  
3 1 Changes in the rates of weight and waist circumference gain in Australian adults over time.  
4  
5  
6  
7  
8  
9  
10  
11  
12  
13  
14  
15  
16  
17  
18  
19  
20  
21  
22  
23  
24  
25  
26  
27  
28  
29  
30  
31  
32  
33  
34  
35  
36  
37  
38  
39  
40  
41  
42  
43  
44  
45  
46  
47  
48  
49  
50  
51  
52  
53  
54  
55  
56  
57  
58  
59  
60

2

3 Anna Peeters (Head, Obesity and Population Health)<sup>1</sup>, Dianna J Magliano (Head, Diabetes  
4 and Population Health)<sup>1</sup>, Kathryn Backholer (Research Fellow)<sup>1</sup>, Paul Zimmet (Emeritus  
5 Director)<sup>1</sup>, Jonathan E Shaw (Director, Clinical Epidemiology and Diabetes)<sup>1</sup>

6 1 Baker IDI Heart and Diabetes Institute, Melbourne 3004, Victoria, Australia

7

8 Running title: Change in weight and waist gain over time

9

10 Corresponding author:

11 Anna Peeters

12 Obesity and Population Health

13 Baker IDI Heart and Diabetes Institute

14 Commercial Rd

15 Melbourne 3004

16 Australia

17 Phone: +61 3 8532 1928

18 Email: [anna.peeters@bakeridi.edu.au](mailto:anna.peeters@bakeridi.edu.au)

19

1  
2  
3 **ABSTRACT**  
4  
5

6 **Objective:** To assess in a single cohort whether annual weight and waist circumference (WC)  
7  
8 change has varied over time.  
9

10  
11 **Design:** Longitudinal cohort study with three surveys, 1– 1999/2000; 2– 2004/2005; 3–  
12  
13 2011/2012. Generalized linear mixed models with random effects were used to compare  
14  
15 annualised weight and WC change between surveys 1 and 2 (Period 1) with that between  
16  
17 surveys 2 and 3 (Period 2). Models were adjusted for age to analyse changes with time rather  
18  
19 than age. Models were additionally adjusted for sex, education status, area-level socio-  
20  
21 economic disadvantage, ethnicity, body mass index, diabetes status, and smoking status.  
22  
23

24  
25 **Setting:** The Australian Diabetes, Obesity and Lifestyle study (AusDiab)- a population-  
26  
27 based, stratified-cluster survey of 11,247 adults aged  $\geq 25$  years.  
28  
29

30  
31 **Participants:** 3,351 Australian adults who attended each of three surveys and had complete  
32  
33 measures of weight, WC and covariates.  
34  
35

36  
37 **Primary outcome measures:** Weight and WC were measured at each survey. Change in  
38  
39 weight and WC was annualised for comparison between the two Periods.  
40

41  
42 **Results:** Mean weight and WC increased in both Periods (0.34kg/y, 0.43cm/y Period 1;  
43  
44 0.13kg/y, 0.46 cm/y Period 2). Annualised weight gain in Period 2 was 0.11kg/year (95% CI  
45  
46 0.06–0.15) less than Period 1. Lesser annual weight gain between the two periods was not  
47  
48 seen for those with greatest area-level socio-economic disadvantage, or in men over the age  
49  
50 of 55. In contrast, the annualised WC increase in Period 2 was greater than Period 1  
51  
52 (0.07cm/year, 95% CI 0.01–0.12). The increase was greatest in males 55+ and those with  
53  
54 greater area-level socio-economic disadvantage.  
55  
56  
57  
58  
59  
60

1  
2  
3 42 **Conclusions:** Between 2004/5–2011/2, Australian adults in a national study continued to gain  
4  
5 43 weight, but more slowly than 1999/2000–2004/5. While weight gain may be slowing, this  
6  
7 44 was not observed for older men or those in more disadvantaged groups, and the same cannot  
8  
9 45 be said for WC.

10  
11  
12 46 *Article summary*

13  
14  
15 47 *Article focus*

- 16  
17  
18  
19 48 • We aimed to assess in a single cohort whether change in weight and waist  
20  
21 49 circumference has changed in recent time periods, independent of age.

22  
23  
24 50 *Key messages*

- 25  
26  
27 51 • Between 2004/5–2011/2, Australian adults in this national cohort study continued to  
28  
29 52 gain weight, but more slowly than 1999/2000–2004/5.
- 30  
31  
32 53 • In contrast waist circumference gain was greater in the most recent period. Important  
33  
34 54 differences were observed according to area-level socio-economic disadvantage.
- 35  
36  
37 55 • While weight gain may be slowing, this has not been observed for older men or those  
38  
39 56 in more disadvantaged groups.

40  
41  
42  
43 57 *Strengths and limitations*

- 44  
45  
46 58 • Reliably measured data in a single nationally representative cohort in recent time  
47  
48 59 periods
- 49  
50  
51 60 • Analyses adjusted and matched for age for comparison between Periods to enable  
52  
53 61 analysis of changes over time, rather than age
- 54  
55  
56  
57  
58  
59  
60

- 1  
2  
3 62 • Selection and response bias may limit the generalisability of the results to the broader  
4  
5 63 Australian population  
6  
7  
8  
9 64  
10  
11  
12  
13  
14  
15  
16  
17  
18  
19  
20  
21  
22  
23  
24  
25  
26  
27  
28  
29  
30  
31  
32  
33  
34  
35  
36  
37  
38  
39  
40  
41  
42  
43  
44  
45  
46  
47  
48  
49  
50  
51  
52  
53  
54  
55  
56  
57  
58  
59  
60
- Selection and response bias may limit the generalisability of the results to the broader Australian population

For peer review only



1  
2  
3 65 Obesity in adults has increased rapidly over the past few decades, leading to prevalence of  
4  
5 66 over one quarter in many developed countries [1]. There is growing acceptance that strong  
6  
7 67 preventive measures are required to stem the increasing prevalence, with a variety of  
8  
9  
10 68 approaches implemented, ranging from social marketing through whole of community  
11  
12 69 interventions to regulatory strategies.

13  
14  
15 70 There have been some suggestions that obesity prevention interventions in children have had  
16  
17 71 a positive effect, due to the observation that the prevalence of obesity is no longer increasing  
18  
19 72 at the same rate [2] [3]. A recent review of 52 studies, from 25 countries, comparing obesity  
20  
21 73 prevalence at two time points since 1999 [4] concluded that in more developed nations a  
22  
23 74 likely slowing of the rate of increase in obesity prevalence was occurring in children, with a  
24  
25 75 possible turning point around 2000. However, trends in adults in this review generally  
26  
27 76 appeared to be continuing to increase. Since this review, an analysis of US adults through the  
28  
29 77 repeated National Health and Nutrition Examination Surveys (NHANES) between 1999 and  
30  
31 78 2010 suggested no increase in mean body mass index (BMI) or obesity prevalence over that  
32  
33 79 time period in non-Hispanic white and Hispanic women, but continued increases in men and  
34  
35 80 non-Hispanic black and Mexican American women [5]. In Australia, the latest reported data  
36  
37 81 suggests a continued increase in obesity prevalence in adults to 2012 [6]. However,  
38  
39 82 prevalence data is driven by a range of factors, including migration, mortality and response  
40  
41 83 bias. To determine whether the degree of weight gain in the population has slowed over time,  
42  
43 84 a comparison of the rates of weight change is required.

44  
45  
46  
47  
48  
49 85 We aimed to analyse whether the degree of change in weight and waist circumference (WC)  
50  
51 86 over time differed in a single cohort of adults, comparing weight and WC change in the same  
52  
53 87 individuals between two consecutive time periods, adjusting for age. We used the national  
54  
55 88 Australian Diabetes, Obesity and Lifestyle cohort (AusDiab) [7], and compared annualised  
56  
57 89 change in weight and WC between 2000 and 2005 to that between 2005 and 2012.

1  
2  
3 90 **METHODS**  
4  
5

6 91 **Setting and Participants**  
7

8  
9 92 The Australian Diabetes, Obesity and Lifestyle study (AusDiab) is a population-based,  
10  
11 93 stratified-cluster survey of 11, 247 adults aged  $\geq 25$  years, recruited in 1999 -2000  
12  
13 94 (AusDiab1). Methods and response rates have been described previously[7]. Five-year  
14  
15 95 follow-up was conducted in 2004-2005 (AusDiab2) and a 12-year follow-up was conducted  
16  
17 96 in 2012 (AusDiab3). From the original cohort, 6,400 and 4,614 returned for physical  
18  
19 97 examination and interviewer-administered questionnaire at AusDiab2 and AusDiab3,  
20  
21 98 respectively. For this analysis we excluded participants with missing data on weight or WC  
22  
23 99 at any of AusDiab 1, 2 or 3, leaving 3,908 participants. We further excluded those  
24  
25 100 participants missing any of the variables used as covariates at AusDiab 1 or 2, resulting in a  
26  
27 101 final sample size of 3,351. Ethics approval was obtained from the International Diabetes  
28  
29 102 Institute, Monash University, and the Alfred Hospital Melbourne. All participants consented  
30  
31 103 to participate in the study.  
32  
33  
34

35  
36 104 All study assessments followed a similar protocol [8] [7]. Data were collected by  
37  
38 105 interviewer-administered questionnaires on medical history, lifestyle and health behaviour.  
39  
40

41  
42 106 **Outcomes**  
43

44  
45 107 Height was measured without shoes, using a stadiometer and recorded to the nearest 0.5 cm.  
46  
47 108 Weight was measured without shoes, excess clothing, and items in pockets by a single  
48  
49 109 measurement at each survey. Weight at AusDiab1 was measured using a mechanical beam  
50  
51 110 balance. Weight at AusDiab 2 and 3 was measured using digital weighing scales. Weight was  
52  
53 111 recorded to the nearest 0.1 kg. At all surveys, scales were calibrated using 5kg weights prior  
54  
55 112 to each set of measurements. BMI was obtained from the calculation of weight (kg) divided  
56  
57  
58  
59  
60

1  
2  
3 113 by height (m<sup>2</sup>). Annual weight change was calculated as the difference in weight between  
4  
5 114 AusDiab 1 and 2 (Period 1), or AusDiab 2 and 3 (Period 2), divided by the follow-up time  
6  
7 115 between the two consecutive surveys.  
8  
9  
10 116 Waist circumference was measured twice, halfway between the lower border of the ribs and  
11  
12 117 the iliac crest on a horizontal plane. If measurements varied by >2 cm, a third was taken; the  
13  
14 118 mean of the two closest measurements was calculated. Annualised WC change was  
15  
16 119 calculated as the difference in WC between AusDiab 1 and 2, or AusDiab 2 and 3, divided by  
17  
18 120 the follow-up time between the two consecutive surveys.  
19  
20  
21

## 22 121 **Co-factors**

23  
24  
25 122 Data on education, country of birth, smoking and physical activity and television  
26  
27 123 viewing habits were obtained by questionnaire. Self-reported cardiovascular disease was  
28  
29 124 ascertained by asking if participants had been told by a doctor or nurse that they had angina,  
30  
31 125 myocardial infarction, or stroke.  
32  
33

34  
35 126 Smoking status was defined as 1) current daily smoker and 2) ex-smoker (smoking less than  
36  
37 127 daily for at least the last 3 months, but used to smoke daily) and non-smoker (never smoked  
38  
39 128 tobacco daily) combined [9] [7].  
40  
41

42 129 Education level was ascertained by asking the question “Which of these describes the highest  
43  
44 130 qualification you have received?” Education was categorised as secondary only (comprising  
45  
46 131 those with a secondary school qualification), diploma (comprising nursing or teaching  
47  
48 132 qualification, trade certificate or undergraduate diploma), and degree (comprising bachelor  
49  
50 133 degree, post-graduate diploma or masters degree/doctorate)[10].  
51  
52

53  
54 134 Area-level socio-economic disadvantage was estimated using the Index of Relative  
55  
56 135 Disadvantage code from the Socio-economic Indexes for Areas (SEIFA). The index was  
57  
58  
59  
60

1  
2  
3 136 developed by the Australian Bureau of Statistics, to create a summary measure from a group  
4  
5 137 of 20 variables (related to education, income, employment, family composition, housing  
6  
7 138 benefits, car ownership, ethnicity, English language proficiency, residential overcrowding)  
8  
9  
10 139 displaying dimensions of social disadvantage [11]. The index is constructed so that high  
11  
12 140 values reflect areas with high socio-economic status (relative advantage) and low values  
13  
14 141 reflect areas with low socio-economic status (relative disadvantage). Tertiles of disadvantage  
15  
16 142 were calculated amongst the final study sample.

17  
18  
19 143 Physical activity was measured via an interviewer-administered Active Australia  
20  
21 144 questionnaire, which considered participation in predominantly leisure-time physical  
22  
23 145 activities (including walking for transport) during the previous week [12]. Total physical  
24  
25 146 activity time was calculated as the sum of the time spent walking (if continuous and for  $\geq 10$   
26  
27 147 minutes) or performing moderate-intensity activity, plus double the time spent in vigorous-  
28  
29 148 intensity physical activity [13].

30  
31  
32  
33 149 Self-reported television viewing time was calculated as the total time spent watching  
34  
35 150 television or videos in the previous week, and is considered a reliable and valid estimate of  
36  
37 151 television viewing time among adults [14].

38  
39  
40  
41 152 Average daily energy intake was assessed using a self-administered food frequency  
42  
43 153 questionnaire (FFQ) [15], which included 74 items (with 10 frequency options), with  
44  
45 154 additional questions on food habits, portion size and consumption of alcoholic beverages. In  
46  
47 155 AusDiab1, blood pressure was measured using a standard mercury sphygmomanometer in the  
48  
49 156 state of Victoria only and by Dinamap elsewhere. To account for any effect due to differential  
50  
51 157 measurement error, manual blood pressure measurements were adjusted as previously  
52  
53 158 described [16]. In AusDiab 2 and 3, blood pressure was measured by an Omron machine.  
54  
55  
56  
57  
58  
59  
60

1  
2  
3 159 Fasting serum total cholesterol was measured with an Olympus AU600 analyser (Olympus  
4  
5 160 Optical, Tokyo, Japan) at a central laboratory [17].  
6  
7  
8 161 Classification of diabetes status has been described elsewhere [17]. Briefly, participants were  
9  
10 162 classified as having 'known diabetes' if they reported having doctor diagnosed diabetes and  
11  
12 163 were either taking hypoglycaemic medication or had fasting plasma glucose (FPG)  
13  
14 164  $\geq 7.0$ mmol/L or a 2-hour plasma glucose (PG)  $\geq 11.1$ mmol/L. Participants not reporting  
15  
16 165 diabetes but with FPG  $\geq 7.0$ mmol/L or 2-hour PG  $\geq 11.1$ mmol/L were classified as having  
17  
18 166 'newly diagnosed diabetes'.  
19

### 20 21 167 **Statistical analysis**

22  
23 168 Baseline characteristics (means and proportions at AusDiab1) were compared between  
24  
25 169 AusDiab participants with and without complete measures at AusDiab 1, 2 and 3.  
26  
27 170 Characteristics of the included population were also compared in 2000 and 2005,  
28  
29 171 representing the two baseline surveys for the two weight change periods.  
30  
31 172 The difference in annualised weight and WC change in Period 1 (2000 to 2005), compared to  
32  
33 173 Period 2 (2005 and 2012), was assessed using linear regression analysis. Generalized linear  
34  
35 174 mixed models with random effects were used to analyse the association between study period  
36  
37 175 on annual weight or WC change. This model includes random effects associated with both  
38  
39 176 the cluster and the units of analysis (participants) to take the clustered structure of the data  
40  
41 177 into account and to allow the residuals associated with the longitudinal measures on the same  
42  
43 178 unit of analysis to be correlated. Models were adjusted sequentially for age and sex, (Model  
44  
45 179 1), additionally adjusting for smoking, education, area level disadvantage and country of birth  
46  
47 180 (Model 2), additionally adjusting for baseline BMI and diabetes status (Model 3), and  
48  
49 181 additionally adjusting for baseline TV time, exercise time, and energy intake (Model 4).  
50  
51 182 Baseline refers to the variables measured at AusDiab1 for change in Period 1, and AusDiab2  
52  
53 183 for change in Period 2. Adjustment for age enables the differences in weight and WC change  
54  
55  
56  
57  
58  
59  
60

1  
2  
3 184 observed between the two Periods to be attributed to time rather than age. The association  
4  
5 185 between study period and annualised weight and WC change was also analysed across sub-  
6  
7 186 groups and interaction terms between study period with age or sex were analysed.

8  
9  
10 187 The primary analyses were repeated after excluding the few participants with annual weight  
11  
12 188 change greater than 5 kg/y or less than -5 kg/y, and restricting participants to the overlapping  
13  
14 189 age group of 30–80.

15  
16 190 All analyses were performed in STATA (version 11.0), with statistical significance set at the  
17  
18 191 5% level.

19  
20  
21 192  
22  
23  
24  
25  
26  
27  
28  
29  
30  
31  
32  
33  
34  
35  
36  
37  
38  
39  
40  
41  
42  
43  
44  
45  
46  
47  
48  
49  
50  
51  
52  
53  
54  
55  
56  
57  
58  
59  
60

1  
2  
3 193 **RESULTS**  
4  
5

6 194 The population with complete measures was similar to the total AusDiab cohort with respect  
7  
8 195 to sex and weight, but was younger, with higher educational attainment, and a higher  
9  
10 196 prevalence of never smoking (Table 1). The population with complete measures also had a  
11  
12 197 lower prevalence of chronic disease. There was no appreciable difference between the two  
13  
14 198 groups for weight change in Period 1 after adjustment for differences in age and sex.

15  
16  
17  
18 199 (Table 1 here)  
19

20 200 Participant characteristics in 2000 and 2005 were compared (Table 2). In 2005, in addition to  
21  
22 201 being five years older, the population had a higher prevalence of diabetes (predominantly  
23  
24 202 type 2). In both periods the average change in weight and WC was a gain. In Period 2, a  
25  
26 203 smaller proportion of the population gained weight and annualised weight gain was less, at  
27  
28 204 0.13 kg/year compared to 0.34 kg/year in Period 1. This difference resulted from a lesser  
29  
30 205 weight change across the entire distribution of weight change in Period 2, with minimal  
31  
32 206 difference at the 5<sup>th</sup> percentile, increasing to a difference of 0.50kg/year at the 95<sup>th</sup> percentile  
33  
34 207 of weight change (Appendix Figure 1A). For WC, there was no difference in the crude  
35  
36 208 annualised change between the two periods (Table 2). In contrast to weight change, this  
37  
38 209 resulted from both a smaller gain in those whose WC increased and a smaller loss in those  
39  
40 210 whose WC decreased (Appendix Figure 1B). The correlation between weight and WC change  
41  
42 211 was 0.69 (0.68 in Period 1, and 0.71 in Period 2).  
43  
44  
45  
46  
47

48 212 (Table 2 here)  
49

50  
51 213 Comparison of the crude annualised weight change for matching 10-year age-groups in  
52  
53 214 Periods 1 and 2 indicated a smaller weight gain in Period 2 for most age and sex groups,  
54  
55 215 although these differences were only significant for men aged 35–44, and women 45–54 and  
56  
57  
58  
59  
60

1  
2  
3 216 65–74 (Table 3). Comparison of the crude annualised WC change for matching age-groups in  
4  
5 217 Periods 1 and 2 indicated no difference in WC gain between the two periods for women and a  
6  
7 218 generally larger WC gain in Period 2 for men (significant for men aged 45–54 and 55–64;  
8  
9 219 Table 3).

10  
11  
12 220 (Table 3 here)

13  
14  
15 221 The difference in annualised weight and WC change in Period 2, compared to Period 1, was  
16  
17 222 assessed using linear regression analysis (Table 4). In Period 2, annualised weight gain was  
18  
19 223 0.11 kg/year (95% CI 0.06, 0.15) less than in Period 1. This did not alter substantially after  
20  
21 224 further adjustment for smoking status, education status, ethnicity, area-level socio-economic  
22  
23 225 disadvantage, baseline BMI and diabetes status (Table 4A), nor after adjustment for TV time,  
24  
25 226 exercise time and energy intake (results not shown).

26  
27  
28  
29 227 Annualised weight gain in Period 2 was less than in Period 1 for most sub-groups (Table 4A),  
30  
31 228 with suggestions of a greater difference over time in women, and those aged under 55 years  
32  
33 229 (although no interaction tests on these factors were significant). Annualised weight gain in  
34  
35 230 Period 2 was non-significantly less than in Period 1 for those with high educational  
36  
37 231 attainment (borderline significant), obesity, and those from a non-English speaking  
38  
39 232 background. No difference in annualised weight gain between the two periods was observed  
40  
41 233 for those in the tertile of greatest area-level socio-economic disadvantage, nor for current  
42  
43 234 smokers.

44  
45  
46  
47  
48 235 In Period 2, annualised WC gain was 0.07 cm/year more than in Period 1 (Table 4B). This  
49  
50 236 did not alter substantially after further adjustment for smoking status, education status, area-  
51  
52 237 level socio-economic disadvantage, ethnicity, baseline BMI and diabetes status (Table 4B),  
53  
54 238 nor after adjustment for TV time, exercise time and energy intake (results not shown).



1  
2  
3 239 In stratified analyses no difference in annualised WC gain between the two periods was  
4  
5 240 observed for women, those aged <55 years, those in the highest education group, those with  
6  
7 241 normal weight nor ex-smokers. Annualised WC gain was less in Period 2 than Period 1 for  
8  
9 242 those in the tertile of least area-level socio-economic disadvantage (-0.14cm/year 95%CI -  
10  
11 243 .05, -0.23).

12  
13  
14  
15 244 (Table 4 here)

16  
17  
18 245 For both weight and WC, there was an apparent combined sex and age effect, such that older  
19  
20 246 men had the least favourable changes over time (Figure 1).

21  
22  
23 247 The primary analyses were repeated after excluding the few participants with annual weight  
24  
25 248 change greater than 5 kg/y or less than -5 kg/y, and restricting participants to the overlapping  
26  
27 249 age group of 30–80. No differences in results were seen.

28  
29  
30  
31 250

32  
33  
34 251

## 35 36 252 **DISCUSSION**

37  
38  
39 253 In this analysis of a single cohort of Australian adults, weight and WC increased in the most  
40  
41 254 recent period in all population sub-groups examined. Age-adjusted annualised weight gain  
42  
43 255 between 2005–2012 was less than between 1999/2000–2005, but annualised WC gain was  
44  
45 256 greater. Lesser weight gain over time was not seen in older men or those with greatest area-  
46  
47 257 level socio-economic disadvantage.

48  
49  
50  
51 258

52  
53  
54  
55 259 The lack of difference in weight and WC change between the two periods observed for  
56  
57 260 current smokers, those from a non-English speaking background and those with obesity, is

1  
2  
3 261 likely to reflect small sample sizes in these groups. In general, adjustment for covariates had  
4  
5 262 little effect on the observed associations between study period and weight and WC change.  
6  
7 263 As time spent watching TV, exercise and energy intake might be expected to be mediating  
8  
9 264 much of the observed changes, we had expected an observable reduction in the difference  
10  
11 265 between study periods after adjustment for these factors. The lack of impact after adjustment  
12  
13 266 likely reflects that they are relatively blunt instruments to detect small changes in behaviour  
14  
15  
16 267 over time. The self-reported nature of these behavioural questionnaires is associated with  
17  
18 268 both differential and non-differential error [18] [19]. While validated, the FFQ is has a  
19  
20 269 limited list of foods and is affected by the inability of individuals to accurately report their  
21  
22  
23 270 food intake retrospectively over a long period of time [20]. Further the Active Australia  
24  
25 271 questionnaire only refers to leisure time activity and TV watching is only one component of  
26  
27 272 sitting time.  
28  
29  
30 273  
31 274 The general observation that weight gain may be lessening over time supports the cross-  
32  
33 275 sectional time series observations of a plateau in the prevalence of obesity and rate of change  
34  
35 276 in BMI [4]. However, these results also suggest that the general observations do not tell the  
36  
37 277 whole story, with large differences between different population subgroups, and a contrasting  
38  
39 278 observation for waist circumference. The sex differences observed here are similar to the  
40  
41 279 cross-sectional trends reported for American adults for whom a clear plateau in obesity  
42  
43 280 prevalence has been observed for women but not men [5]. The differences we observed  
44  
45 281 according to level of area-level socio-economic disadvantage also reflect findings from the  
46  
47 282 review of obesity trends in which the levelling off of obesity was generally more pronounced  
48  
49 283 in groups with higher socio-economic position [4]. It will be important to do a similar  
50  
51 284 analysis in a longitudinal children's cohort, as their experience is likely to differ from that of  
52  
53 285 adults. Children have been exposed to a wide range of obesity prevention interventions,  
54  
55  
56  
57  
58  
59  
60

1  
2  
3 286 particularly in schools, in countries such as Australia and cross-sectional trends clearly  
4  
5 287 suggest a plateauing in the prevalence of obesity in children [4].  
6  
7  
8 288 The observation that rates of WC change may be continuing to increase even as rates of  
9  
10 289 weight change decrease may reflect prior findings using the NHANES data that WC is  
11  
12 290 increasing to a greater extent than expected from changes in weight [21] [22]. While we  
13  
14 291 observed changes in weight and WC to be highly correlated these results combined suggest a  
15  
16 292 preferential increase in abdominal adiposity over time, which is thought to be associated with  
17  
18 293 greater risk of cardio-metabolic outcomes [23]. The potential implication that current  
19  
20 294 bodyweight trends are leading a more metabolically active obesity, with increased risks for  
21  
22 295 outcomes such as diabetes, hypertension and cardiovascular disease warrants further  
23  
24 296 investigation.  
25  
26  
27

28  
29 297 The key strength of the current study is that for the first time it addresses this important  
30  
31 298 question through an analysis of the same cohort of adults over two distinct but recent time  
32  
33 299 periods, independent of the effects of ageing. In doing this, conclusions can be drawn about  
34  
35 300 the changes over time independent of unmeasurable differences in cohorts. Other strengths  
36  
37 301 include the national population sampling strategy of the AusDiab cohort and the measured  
38  
39 302 weight and WC at each study wave.  
40  
41  
42

43 303 The potential limitation of the current study is the lack of generalisability of the included  
44  
45 304 cohort. As with all cohort studies, the AusDiab cohort is a selected population, and those who  
46  
47 305 attended all three waves are more select again, with higher educational attainment and a  
48  
49 306 lower prevalence of chronic disease and risk factors. It is possible that a generally more  
50  
51 307 healthy and health conscious population has a stronger response to population health  
52  
53 308 messages, and consequently the lesser weight gain observed here in consecutive age cohorts  
54  
55 309 over time may be greater than would be observed for the general population. However, the  
56  
57  
58  
59  
60

1  
2  
3 310 current observations lend support to the concept that weight gain is decreasing over time in  
4  
5 311 the population, even if the AusDiab cohort represents a particularly sensitive indicator. One  
6  
7 312 further potential limitation is the use of different weighing scales at AusDiab 2 and 3  
8  
9  
10 313 compared to AusDiab1. Although all scales were calibrated in the same way at each survey  
11  
12 314 wave, differences in variability between the scales may have led to more variability in the  
13  
14 315 change in weight in Period 1 than Period 2.

15  
16  
17 316 The results also suggest there is no room for complacency in obesity prevention. The rates of  
18  
19 317 overweight and obesity remain high, the average change in weight and WC remains an  
20  
21 318 increase and there is no reduction in the rate of WC gain. Further, no decrease in the rate of  
22  
23 319 weight or WC change were observed in older men. Finally, the observation that no decrease  
24  
25 320 in rates of weight and WC change is being seen by those living in the most socially  
26  
27 321 disadvantaged neighbourhoods suggests current trends are likely to lead to an increase in the  
28  
29 322 social inequalities in obesity, and consequent ill health [24]. It is critical that further studies  
30  
31 323 are conducted to confirm these findings and that we work to identify the causes of the  
32  
33 324 observed changes, including the differences observed in specific population sub-groups.  
34  
35

36  
37  
38 325 In summary, between 2004/5 and 2011/2 Australian adults continued to gain weight: WC at a  
39  
40 326 faster rate than between 1999/2000 and 2004/4, and weight at a slower rate. While weight  
41  
42 327 gain may be slowing, it does not appear to be affecting older men or those in more  
43  
44 328 disadvantaged groups, and the same cannot be said for WC.  
45  
46

47  
48 329

49  
50 330

51  
52 331

53  
54 332

1  
2  
3 333 **Acknowledgements**  
4

5 334 The authors would like to acknowledge all AusDiab participants, investigators and sponsors.  
6

7 335 The authors would like to acknowledge Parneet Sethi for useful discussions on this work.  
8

9  
10 336 ***Data sharing***  
11

12 337 Extra data is available by emailing A Peeters at [anna.peeters@bakeridi.edu.au](mailto:anna.peeters@bakeridi.edu.au)  
13  
14

15  
16 338 ***Authorship statement***  
17

18 339 AP conceived of the article, executed the analysis and writing of the article and is guarantor  
19

20 340 for the article. JS, DM and KB contributed to the ideas included within and writing of the  
21

22 341 article, and provision of data. PZ contributed to the writing of the article and provision of  
23

24 342 data.  
25  
26  
27

28 343 ***Funding***  
29

30  
31 344 This work was supported by VicHealth (Fellowship, AP), the Australian National Preventive  
32

33 345 Health Agency (Project grant) and Australia Research Council (ARC-linkage grant  
34

35 346 LP12010041). J.E.S. is supported by a National Health and Medical Research Council  
36

37 347 Fellowship (586623).  
38  
39

40 348 The AusDiab study, co-coordinated by the Baker IDI Heart and Diabetes Institute, was  
41

42 349 supported in part by the Victorian Government's OIS Program, and gratefully acknowledges  
43

44 350 the generous support given by: National Health and Medical Research Council (NHMRC  
45

46 351 grant 233200), Australian Government Department of Health and Ageing. Abbott Australasia  
47

48 352 Pty Ltd, Alphapharm Pty Ltd, AstraZeneca, Bristol-Myers Squibb, City Health Centre-  
49

50 353 Diabetes Service-Canberra, Department of Health and Community Services - Northern  
51

52 354 Territory, Department of Health and Human Services – Tasmania, Department of Health –  
53

54 355 New South Wales, Department of Health – Western Australia, Department of Health – South  
55  
56  
57  
58  
59  
60

1  
2  
3 356 Australia, Department of Human Services – Victoria, Diabetes Australia, Diabetes Australia  
4  
5 357 Northern Territory, Eli Lilly Australia, Estate of the Late Edward Wilson, GlaxoSmithKline,  
6  
7 358 Jack Brockhoff Foundation, Janssen-Cilag, Kidney Health Australia, Marian & FH Flack  
8  
9 359 Trust, Menzies Research Institute, Merck Sharp & Dohme, Novartis Pharmaceuticals, Novo  
10  
11 360 Nordisk Pharmaceuticals, Pfizer Pty Ltd, Pratt Foundation, Queensland Health, Roche  
12  
13 361 Diagnostics Australia, Royal Prince Alfred Hospital, Sydney, Sanofi Aventis, Sanofi  
14  
15  
16 362 Synthelabo.  
17  
18 363  
19  
20  
21 364 **Competing Interests**  
22  
23 365 None  
24  
25  
26  
27  
28  
29  
30  
31  
32  
33  
34  
35  
36  
37  
38  
39  
40  
41  
42  
43  
44  
45  
46  
47  
48  
49  
50  
51  
52  
53  
54  
55  
56  
57  
58  
59  
60

366 **References**

- 367 1. International Association for the Study of Obesity. Obesity the global epidemic. Secondary  
368 Obesity the global epidemic 2013.  
369 <http://www.iaso.org/iotf/obesity/obesitytheglobalepidemic/>.
- 370 2. Stamatakis E, Zaninotto P, Falaschetti E, et al. Time trends in childhood and adolescent  
371 obesity in England from 1995 to 2007 and projections of prevalence to 2015. *J*  
372 *Epidemiol Community Health* 2010;**64**(2):167-74 doi:  
373 10.1136/jech.2009.098723[published Online First: Epub Date].
- 374 3. Sundblom E, Petzold M, Rasmussen F, et al. Childhood overweight and obesity  
375 prevalences levelling off in Stockholm but socioeconomic differences persist. *Int J*  
376 *Obes (Lond)* 2008;**32**(10):1525-30 doi: 10.1038/ijo.2008.104[published Online First:  
377 Epub Date].
- 378 4. Rokholm B, Baker JL, Sorensen TI. The levelling off of the obesity epidemic since the  
379 year 1999--a review of evidence and perspectives. *Obes Rev* 2010;**11**(12):835-46 doi:  
380 10.1111/j.1467-789X.2010.00810.x[published Online First: Epub Date].
- 381 5. Flegal KM, Carroll MD, Kit BK, et al. Prevalence of obesity and trends in the distribution  
382 of body mass index among US adults, 1999-2010. *JAMA* 2012;**307**(5):491-7 doi:  
383 10.1001/jama.2012.39[published Online First: Epub Date].
- 384 6. Statistics ABo. Australian Health Survey: First Results, 2011-12. Canberra: Australian  
385 Bureau of Statistics, 2012.
- 386 7. Dunstan DW, Zimmet PZ, Welborn TA, et al. The Australian Diabetes, Obesity and  
387 Lifestyle Study (AusDiab)--methods and response rates. *Diabetes Res Clin Pract*  
388 2002;**57**(2):119-29
- 389 8. Cameron AJ, Welborn TA, Zimmet PZ, et al. Overweight and obesity in Australia: the  
390 1999-2000 Australian Diabetes, Obesity and Lifestyle Study (AusDiab). *Med J Aust*  
391 2003;**178**(9):427-32
- 392 9. Risk Factor Prevalence Management Committee. Risk factor prevalence study No.3, 1989:  
393 National Heart Foundation and Australian Institute of Health, 1990.
- 394 10. Williams ED, Magliano DJ, Zimmet PZ, et al. Area-level socioeconomic status and  
395 incidence of abnormal glucose metabolism: the Australian Diabetes, Obesity and  
396 Lifestyle (AusDiab) study. *Diabetes Care* 2012;**35**(7):1455-61 doi: 10.2337/dc11-  
397 1410[published Online First: Epub Date].

- 1  
2  
3 398 11. Statistics ABo. Information Paper - Census of Population and Housing: Socio-Economic  
4 399 Indexes for Areas Australia 2001. : Australian Bureau of Statistics, 2001.
- 5  
6 400 12. Australian Institute of Health and Welfare. The Active Australia Survey. A guide and  
7 401 manual for implementation, analysis and reporting. Canberra: Australian Institute of  
8 402 Health and Welfare, 2003.
- 9  
10 403 13. Armstrong T, Bauman A, Davies J. Physical activity patterns of Australian adults. Results  
11 404 of the 1999 National Physical Sctivity Survey. Australian Institute of Health and  
12 405 Welfare cat No CVD10. Canberra: Australian Institute of Health and Welfare, 2000.
- 13  
14 406 14. Salmon J, Bauman A, Crawford D, et al. The association between television viewing and  
15 407 overweight among Australian adults participating in varying levels of leisure-time  
16 408 physical activity. *Int. J. Obes. Relat. Metab. Disord.* 2000;**24**:600-6
- 17  
18 409 15. Ireland P, Jolley D, Giles G, et al. Development of the Melbourne FFQ: A food frequency  
19 410 questionnaire for use in an Australian prospective study involving an ethnically  
20 411 diverse cohort. *Asia Pacific J Clin Nutr* 1994;**3**:19-31
- 21  
22 412 16. Briganti EM, Shaw JE, Chadban SJ, et al. Untreated hypertension among Australian  
23 413 adults: the 1999-2000 Australian Diabetes, Obesity and Lifestyle Study (AusDiab).  
24 414 *Med J Aust* 2003;**179**(3):135-9
- 25  
26 415 17. Magliano DJ, Barr EL, Zimmet PZ, et al. Glucose indices, health behaviors, and  
27 416 incidence of diabetes in Australia: the Australian Diabetes, Obesity and Lifestyle  
28 417 Study. *Diabetes Care* 2008;**31**(2):267-72 doi: 10.2337/dc07-0912[published Online  
29 418 First: Epub Date]].
- 30  
31 419 18. Hebert JR, Hurley TG, Peterson KE, et al. Social desirability trait influences on self-  
32 420 reported dietary measures among diverse participants in a multicenter multiple risk  
33 421 factor trial. *J Nutr* 2008;**138**(1):226S-34S
- 34  
35 422 19. Booth ML, Owen N, Bauman AE, et al. Retest reliability of recall measures of leisure-  
36 423 time physical activity in Australian adults. *Int J Epidemiol* 1996;**25**(1):153-9
- 37  
38 424 20. Dodd KW, Guenther PM, Freedman LS, et al. Statistical methods for estimating usual  
39 425 intake of nutrients and foods: a review of the theory. *J Am Diet Assoc*  
40 426 2006;**106**(10):1640-50 doi: 10.1016/j.jada.2006.07.011[published Online First: Epub  
41 427 Date]].
- 42  
43 428 21. Elobeid MA, Desmond RA, Thomas O, et al. Waist circumference values are increasing  
44 429 beyond those expected from BMI increases. *Obesity (Silver Spring)*  
45 430 2007;**15**(10):2380-3 doi: 15/10/2380 [pii]10.1038/oby.2007.282[published Online  
46 431 First: Epub Date]].



- 1  
2  
3 432 22. Walls HL, Stevenson CE, Mannan HR, et al. Comparing trends in BMI and waist  
4 433 circumference. *Obesity (Silver Spring)* 2011;**19**(1):216-9 doi: oby2010149 [pii  
5 434 10.1038/oby.2010.149[published Online First: Epub Date]].  
6  
7  
8  
9 435 23. Welborn TA, Dhaliwal SS, Bennett SA. Waist-hip ratio is the dominant risk factor  
10 436 predicting cardiovascular death in Australia. *Med J Aust* 2003;**179**(11-12):580-5  
11  
12 437 24. Backholer K, Mannan HR, Magliano D, et al. Projected socioeconomic disparities in the  
13 438 prevalence of obesity amongst Australian adults. *Australian and New Zealand Journal*  
14 439 *of Public Health* 2012;**in press**  
15  
16  
17  
18 440  
19  
20 441  
21  
22  
23  
24  
25  
26  
27  
28  
29  
30  
31  
32  
33  
34  
35  
36  
37  
38  
39  
40  
41  
42  
43  
44  
45  
46  
47  
48  
49  
50  
51  
52  
53  
54  
55  
56  
57  
58  
59  
60

1  
2  
3 442

4  
5 443 **Figures**

6  
7 444 Figure 1. Difference in annualised change in weight (kg/year) or waist circumference

8  
9 445 (cm/year) between Period 2 and Period 1, by age and sex. Adjusted for age.

10  
11  
12 446

13  
14 447

15  
16 448

17  
18 449

19  
20 450

For peer review only

451 **Tables**

452 **Table 1** Comparison of characteristics in 1999/2000 between the included and excluded  
 453 population

| Baseline characteristics                      | Included    | Excluded    |
|-----------------------------------------------|-------------|-------------|
| n                                             | 3351        | 7896        |
| Sex (% men)                                   | 45          | 45          |
| Age (mean, y)*                                | 49 (11)     | 52 (16)     |
| Education (% post high school)*               | 67          | 56          |
| Area-level disadvantage (% in lowest tertile) | 25          | 36          |
| Born in Australia or New Zealand (%)          | 80          | 74          |
| Never smoker (%)*                             | 63          | 51          |
| Weight (mean, kg)                             | 76 (16)     | 78 (17)     |
| Waist circumference (mean, cm)                | 89 (13)     | 92 (14)     |
| Energy intake (mean, kj/day)                  | 8225 (3112) | 8137 (3566) |
| TV viewing time (mean, minutes/week)          | 703 (512)   | 829 (613)   |
| Exercise Time (mean, minutes/week)            | 283 (329)   | 269 (332)   |
| Diabetes (%)*                                 | 4.9         | 10.1        |
| Coronary heart disease (%)*                   | 2           | 5           |
| Hypertension (%)                              | 23          | 29          |
| High blood cholesterol (%)                    | 26          | 25          |

454 Notes: data are % or mean (SD) \*Indicates a significant difference (p<0.05)

**Table 2** Characteristics of the cohort in 1999/2000 and 2005

| <b>Cross-sectional characteristics</b> | <b>2000</b>     | <b>2005</b>     |
|----------------------------------------|-----------------|-----------------|
| Age (mean, y)*                         | 49.3 (11.1)     | 54.3 (11.1)     |
| Weight (mean, kg)                      | 76.2 (15.6)     | 77.9 (16.3)     |
| Waist circumference (mean, cm)         | 89.4 (13.4)     | 91.6 (13.6)     |
| Smoking status (% never)               | 63              | 61              |
| Diabetes (%)                           | 4.9             | 6.4             |
| Exercise time (mean, minutes/week)*    | 283 (330)       | 306 (338)       |
| TV time (mean, minutes/week)*          | 703 (512)       | 764 (539)       |
| Energy intake (mean, kj/day)*          | 8225 (3112)     | 7681 (2998)     |
| <b>Changes during follow-up</b>        | <b>Period 1</b> | <b>Period 2</b> |
| Weight change (mean, kg)               | 1.7 (5.2)       | 0.9 (6.1)       |
| Waist circumference change (mean, cm)  | 2.1 (6.2)       | 3.2 (6.9)       |
| Follow-up (mean, y)*                   | 5.0 (0.15)      | 6.9 (0.34)      |
| Proportion gaining weight (%)*         | 64.5            | 56.8            |
| Annualised weight change (mean, kg/y)* | 0.34 (1.04)     | 0.13 (0.89)     |
| Annualised WC change (mean, cm/y)      | 0.43 (1.25)     | 0.46 (1.00)     |

Notes: Data are % or mean (SD) \*Indicates a significant difference (p<0.05)

**Table 3** Comparison of annualised weight and waist circumference change between Period 1 and Period 2 for matching age groups.

| Sex   | Age group | Difference in annualised weight change | Difference in annualised waist circumference change |
|-------|-----------|----------------------------------------|-----------------------------------------------------|
| Men   |           |                                        |                                                     |
|       | 25-34     | -0.08 (-0.5, 0.35)                     | -0.10 (-0.53, 0.32)                                 |
|       | 35-44     | -0.18 (-0.34, -0.02)*                  | 0.12 (-0.06, 0.30)                                  |
|       | 45-54     | -0.10 (-0.22, 0.01)                    | 0.13 (0.01, 0.26)                                   |
|       | 55-64     | -0.03 (-0.1, 0.16)                     | 0.20 (0.05, 0.34)                                   |
|       | 65-74     | -0.12 (-0.26, 0.02)                    | 0.05 (-0.12, 0.23)                                  |
|       | 75+       | 0.27 (-0.10, 0.65)                     | 0.26 (-0.19, 0.72)                                  |
| Women |           |                                        |                                                     |
|       | 25-34     | -0.08 (-0.46, 0.31)                    | -0.05 (-0.47, 0.37)                                 |
|       | 35-44     | -0.12 (-0.26, 0.03)                    | -0.02 (-0.19, 0.16)                                 |
|       | 45-54     | -0.15 (-0.26, -0.04)*                  | -0.01 (-0.14, 0.12)                                 |
|       | 55-64     | -0.09 (-0.20, 0.02)                    | 0.08 (-0.07, 0.23)                                  |
|       | 65-74     | -0.34 (-0.50, -0.17)*                  | -0.08 (-0.31, 0.16)                                 |
|       | 75+       | 0.02 (-0.37, 0.41)                     | 0.27 (-0.32, .85)                                   |

\*Indicates a significant difference ( $p < 0.05$ )

**Table 4** Difference in annualised change in weight (kg/year) (A) and waist circumference (cm/year) (B) in Period 2 compared to Period 1

(A)

|                                                      | Sample size | Annualised weight change in Period 1 | Difference in annualised change in Period 2 compared to change in Period 1 |                      |                      |
|------------------------------------------------------|-------------|--------------------------------------|----------------------------------------------------------------------------|----------------------|----------------------|
|                                                      |             |                                      | Model 1                                                                    | Model 2              | Model 3              |
| Total Population                                     | 3351        | 0.34 (0.30-0.37)                     | -0.11 (-0.15--0.06)*                                                       | -0.10 (-0.15--0.06)* | -0.10 (-0.15--0.06)* |
| Men                                                  | 1503        | 0.29 (0.24-0.34)                     | -0.08 (-0.14--0.01)*                                                       | -0.07 (-0.14--0.01)* | -0.08 (-0.15--0.01)* |
| Women                                                | 1848        | 0.37 (0.32-0.42)                     | -0.13 (-0.20--0.07)*                                                       | -0.13 (-0.19--0.06)* | -0.13 (-0.19--0.06)* |
| Age<55                                               | 2311        | 0.46 (0.41-0.50)                     | -0.12 (-0.19--0.06)*                                                       | -0.12 (-0.18--0.06)* | -0.13 (-0.19--0.06)* |
| Age>=55                                              | 1040        | 0.07 (0.01-0.12)                     | -0.08 (-0.15--0.02)*                                                       | -0.08 (-0.15--0.01)* | -0.07 (-0.14--0.01)* |
| Education- secondary & trade certificate             | 2073        | 0.34 (0.30-0.39)                     | -0.13 (-0.19--0.07)*                                                       | -0.13 (-0.19--0.07)* | -0.13 (-0.19--0.07)* |
| Education- diploma & degree                          | 1278        | 0.32 (0.27-0.38)                     | -0.07 (-0.14-0.00)                                                         | -0.07 (-0.14-0.00)   | -0.06 (-0.14-0.01)   |
| Area level disadvantage-tertile of most disadvantage | 1096        | 0.31 (0.24-0.37)                     | -0.01 (-0.09-0.07)                                                         | -0.01 (-0.09-0.07)   | -0.01 (-0.10-0.07)   |
| Area level disadvantage-middle tertile               | 1130        | 0.40 (0.34-0.47)                     | -0.23 (-0.31--0.14)*                                                       | -0.22 (-0.31--0.14)* | -0.22 (-0.31--0.14)* |
| Area level disadvantage-tertile of least             | 1125        | 0.30 (0.24-0.35)                     | -0.08 (-0.16--0.01)*                                                       | -0.08 (-0.15--0.00)* | -0.08 (-0.15--0.00)* |

|                                          |      |                  |                      |                      |                      |  |
|------------------------------------------|------|------------------|----------------------|----------------------|----------------------|--|
| disadvantage                             |      |                  |                      |                      |                      |  |
| Normal weight                            | 1342 | 0.4 (0.36-0.44)  | -0.07 (-0.13--0.01)* | -0.07 (-0.13--0.01)* | -0.08 (-0.14--0.02)* |  |
| Overweight                               | 1375 | 0.31 (0.26-0.37) | -0.12 (-0.18--0.05)* | -0.11 (-0.18--0.04)* | -0.12 (-0.19--0.05)* |  |
| Obese                                    | 633  | 0.25 (0.14-0.36) | -0.13 (-0.26-0.01)*  | -0.13 (-0.26-0.01)*  | -0.15 (-0.29--0.01)* |  |
| English speaking<br>country of birth     | 3129 | 0.34 (0.30-0.37) | -0.10 (-0.15--0.06)* | -0.1 (-0.15--0.05)*  | -0.1 (-0.15--0.05)*  |  |
| Non-English speaking<br>country of birth | 222  | 0.32 (0.18-0.46) | -0.15 (-0.32-0.02)   | -0.14 (-0.32-0.04)   | -0.15 (-0.33-0.03)   |  |
| Never smokers                            | 2121 | 0.34 (0.29-0.38) | -0.10 (-0.15--0.04)* | -0.1 (-0.15--0.04)*  | -0.10 (-0.15--0.04)* |  |
| Ex smokers                               | 894  | 0.27 (0.20-0.34) | -0.15 (-0.24--0.06)* | -0.15 (-0.24--0.06)* | -0.16 (-0.25--0.07)* |  |
| Current smokers                          | 336  | 0.49 (0.36-0.63) | -0.01 (-0.20-0.19)   | 0.00 (-0.20-0.20)    | 0.00 (-0.20-0.19)    |  |
| No chronic disease#                      | 1944 | 0.42 (0.37-0.47) | -0.10 (-0.16--0.04)* | -0.10 (-0.16--0.04)* | -0.09 (-0.15--0.03)* |  |
| Chronic disease#                         | 1407 | 0.25 (0.20-0.30) | -0.12 (-0.19--0.05)* | -0.11 (-0.19--0.04)* | -0.10 (-0.17--0.02)* |  |

(B)

|                  | Sample size | Annualised WC change<br>in Period 1 | Difference in annualised change in Period 2 compared to<br>change in Period 1 |                   |                   |
|------------------|-------------|-------------------------------------|-------------------------------------------------------------------------------|-------------------|-------------------|
|                  |             |                                     | Model 1                                                                       | Model 2           | Model 3           |
| Total Population | 3351        | 0.43 (0.39-0.48)                    | 0.07 (0.02-0.12)*                                                             | 0.07 (0.02-0.13)* | 0.07 (0.01-0.12)* |
| Men              | 1503        | 0.32 (0.26-0.38)                    | 0.13 (0.05-0.20)*                                                             | 0.13 (0.06-0.21)* | 0.12 (0.05-0.20)* |

|    |                                  |      |                  |                          |                          |                          |
|----|----------------------------------|------|------------------|--------------------------|--------------------------|--------------------------|
| 1  |                                  |      |                  |                          |                          |                          |
| 2  |                                  |      |                  |                          |                          |                          |
| 3  |                                  |      |                  |                          |                          |                          |
| 4  |                                  |      |                  |                          |                          |                          |
| 5  | Women                            | 1848 | 0.53 (0.47-0.59) | 0.02 (-0.06-0.10)        | 0.03 (-0.05-0.11)        | 0.02 (-0.05-0.10)        |
| 6  |                                  |      |                  |                          |                          |                          |
| 7  | Age<55                           | 2311 | 0.50 (0.45-0.55) | 0.05 (-0.03-0.12)        | 0.05 (-0.02-0.13)        | 0.05 (-0.03-0.12)        |
| 8  |                                  |      |                  |                          |                          |                          |
| 9  | Age>=55                          | 1040 | 0.28 (0.21-0.35) | 0.10 (0.02-0.18)*        | 0.10 (0.02-0.19)*        | 0.10 (0.02-0.18)*        |
| 10 |                                  |      |                  |                          |                          |                          |
| 11 | Education- secondary & trade     |      |                  |                          |                          |                          |
| 12 | certificate                      | 2073 | 0.44 (0.39-0.49) | 0.09 (0.02-0.15)*        | 0.09 (0.02-0.16)*        | 0.08 (0.01-0.15)*        |
| 13 |                                  |      |                  |                          |                          |                          |
| 14 | Education- diploma & degree      | 1278 | 0.43 (0.36-0.50) | 0.05 (-0.04-0.14)        | 0.05 (-0.04-0.14)        | 0.05 (-0.04-0.14)        |
| 15 |                                  |      |                  |                          |                          |                          |
| 16 |                                  |      |                  |                          |                          |                          |
| 17 | Area level disadvantage- tertile | 1096 | 0.41 (0.34-0.49) | 0.13 (0.04-0.23)*        | 0.13 (0.04-0.23)*        | 0.14 (0.04-0.23)*        |
| 18 | of most disadvantage             |      |                  |                          |                          |                          |
| 19 | Area level disadvantage-         | 1130 | 0.32 (0.24-0.40) | 0.21 (0.11-0.31)*        | 0.22 (0.12-0.32)*        | 0.22 (0.12-0.32)*        |
| 20 | middle tertile                   |      |                  |                          |                          |                          |
| 21 | Area level disadvantage- tertile |      |                  |                          |                          |                          |
| 22 | of least disadvantage            | 1125 | 0.57 (0.50-0.64) | -0.14 (-0.23--<br>0.05)* | -0.13 (-0.22--<br>0.05)* | -0.15 (-0.23--<br>0.06)* |
| 23 |                                  |      |                  |                          |                          |                          |
| 24 | Normal weight                    | 1342 | 0.48 (0.42-0.54) | 0.04 (-0.04-0.12)        | 0.04 (-0.04-0.12)        | 0.03 (-0.05-0.12)        |
| 25 |                                  |      |                  |                          |                          |                          |
| 26 | Overweight                       | 1375 | 0.43 (0.36-0.49) | 0.08 (-0.01-0.16)        | 0.08 (-0.00-0.17)        | 0.07 (-0.02-0.15)        |
| 27 |                                  |      |                  |                          |                          |                          |
| 28 | Obese                            | 633  | 0.35 (0.24-0.46) | 0.12 (-0.01-0.26)        | 0.13 (-0.00-0.27)        | 0.11 (-0.02-0.25)        |
| 29 |                                  |      |                  |                          |                          |                          |
| 30 |                                  |      |                  |                          |                          |                          |
| 31 | English speaking country of      |      |                  |                          |                          |                          |
| 32 | birth                            | 3129 | 0.44 (0.40-0.48) | 0.06 (0.01-0.12)*        | 0.07 (0.01-0.13)*        | 0.06 (0.01-0.12)*        |
| 33 |                                  |      |                  |                          |                          |                          |
| 34 | Non-English speaking country     |      |                  |                          |                          |                          |
| 35 | of birth                         | 222  | 0.35 (0.18-0.52) | 0.17 (-0.04-0.38)        | 0.18 (-0.02-0.39)        | 0.17 (-0.03-0.38)        |
| 36 |                                  |      |                  |                          |                          |                          |
| 37 | Never smokers                    | 2121 | 0.44 (0.39-0.49) | 0.07 (0.00-0.14)*        | 0.07 (0.01-0.14)*        | 0.07 (0.00-0.14)*        |
| 38 |                                  |      |                  |                          |                          |                          |
| 39 |                                  |      |                  |                          |                          |                          |
| 40 |                                  |      |                  |                          |                          |                          |
| 41 |                                  |      |                  |                          |                          |                          |
| 42 |                                  |      |                  |                          |                          |                          |
| 43 |                                  |      |                  |                          |                          |                          |
| 44 |                                  |      |                  |                          |                          |                          |
| 45 |                                  |      |                  |                          |                          |                          |
| 46 |                                  |      |                  |                          |                          |                          |
| 47 |                                  |      |                  |                          |                          |                          |
| 48 |                                  |      |                  |                          |                          |                          |
| 49 |                                  |      |                  |                          |                          |                          |



1  
2  
3  
4  
5  
6  
7  
8  
9  
10  
11  
12  
13  
14  
15  
16  
17  
18  
19  
20  
21  
22  
23  
24  
25  
26  
27  
28  
29  
30  
31  
32  
33  
34  
35  
36  
37  
38  
39  
40  
41  
42  
43  
44  
45  
46  
47  
48  
49

|                                 |      |                  |                   |                   |                   |
|---------------------------------|------|------------------|-------------------|-------------------|-------------------|
| Ex smokers                      | 894  | 0.38 (0.30-0.46) | 0.04 (-0.06-0.14) | 0.04 (-0.06-0.14) | 0.03 (-0.08-0.13) |
| Current smokers                 | 336  | 0.56 (0.40-0.71) | 0.17 (-0.05-0.39) | 0.17 (-0.05-0.40) | 0.18 (-0.04-0.41) |
| Chronic disease <sup>1</sup>    | 1944 | 0.47 (0.41-0.52) | 0.06 (-0.01-0.13) | 0.07 (-0.01-0.14) | 0.07 (-0.01-0.14) |
| No chronic disease <sup>1</sup> | 1407 | 0.44 (0.39-0.49) | 0.08 (-0.00-0.17) | 0.09 (0.00-0.17)* | 0.1 (0.01-0.18)*  |

Model 1- adjusting for age and sex

Model 2- additionally adjusting for smoking status, education status, area-level disadvantage and ethnicity

Model 3- additionally adjusting for baseline BMI and diabetes status

\* indicates p<0.05

<sup>1</sup> Chronic disease refers to any of coronary heart disease, cholesterol, hypertension, or diabetes at baseline

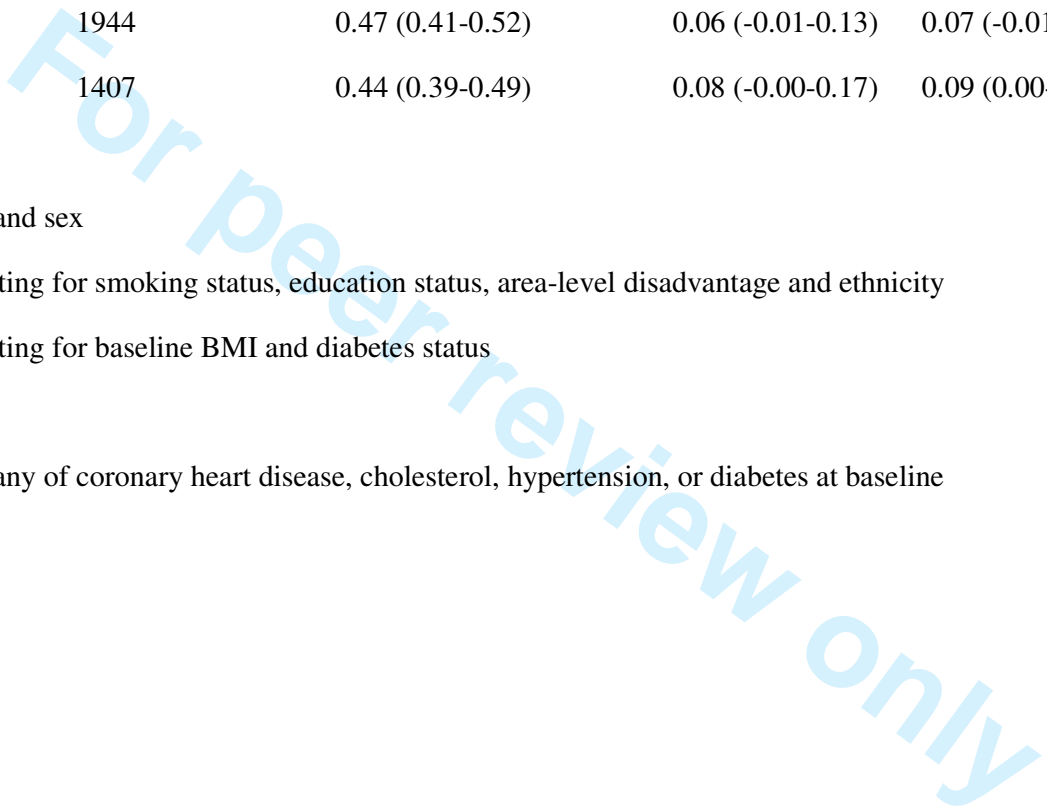

Figure 1. Difference in annualised change in weight (kg/year) or waist circumference (cm/year) between Period 2 and Period 1, by age and sex. Adjusted for age.

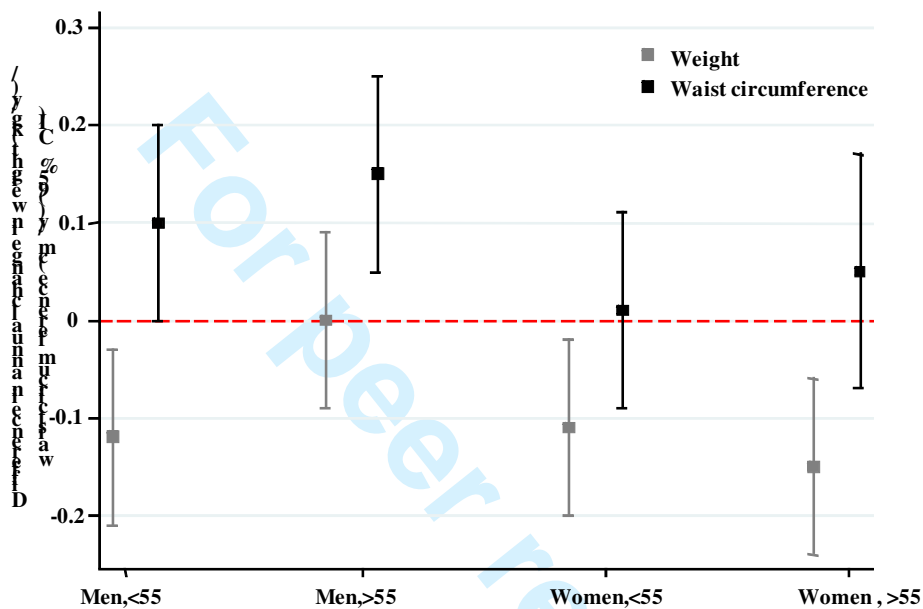

Appendix

Figure 1 Annualised weight and waist circumference change in Period 1 and Period 2

A. Annualised weight change

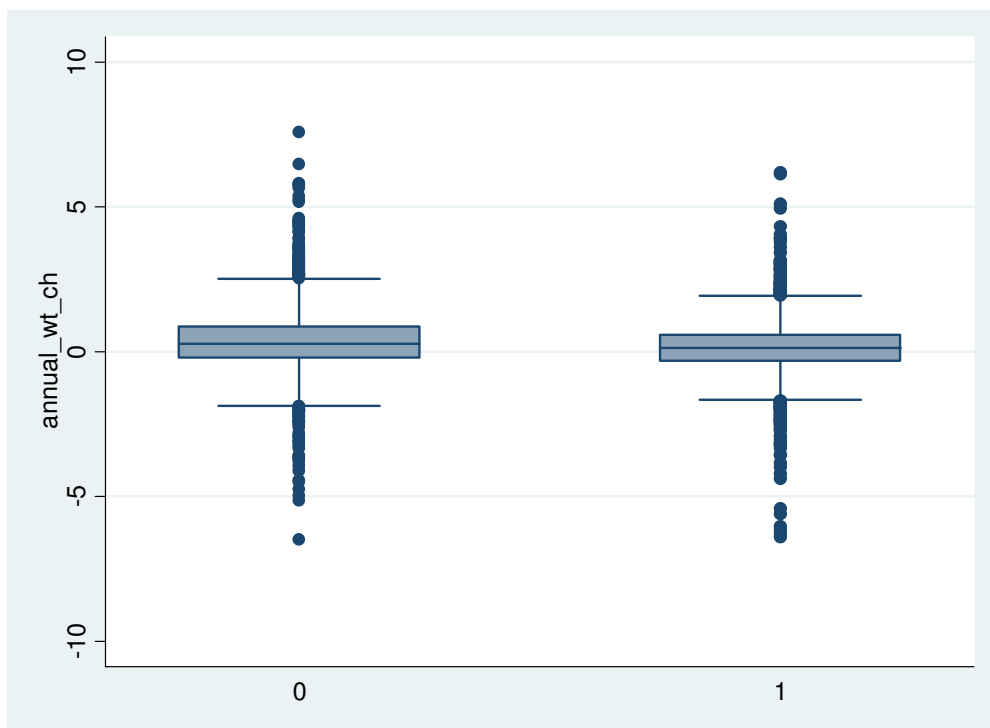

B. Annualised waist circumference change

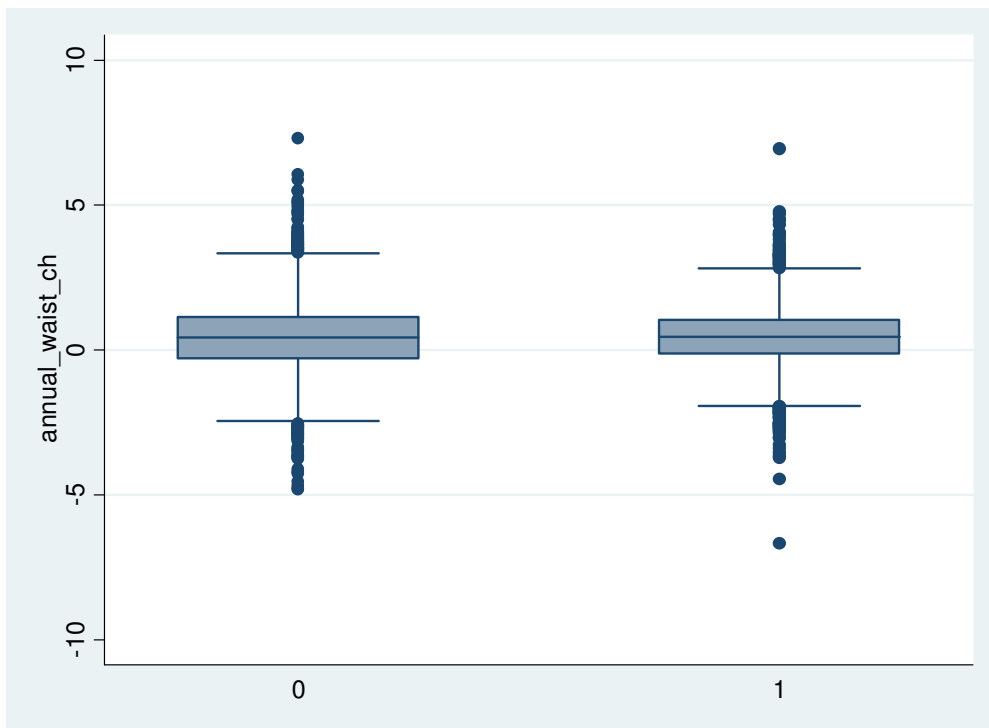

Review only

1  
2  
3  
4  
5  
6  
7  
8  
9  
10  
11  
12  
13  
14  
15  
16  
17  
18  
19  
20  
21  
22  
23  
24  
25  
26  
27  
28  
29  
30  
31  
32  
33  
34  
35  
36  
37  
38  
39  
40  
41  
42  
43  
44  
45  
46  
47  
48  
49  
50  
51  
52  
53  
54  
55  
56  
57  
58  
59  
60

1  
2  
3 1 Changes in the rates of weight and waist circumference gain in Australian adults over time.  
4  
5  
6  
7  
8  
9  
10  
11  
12  
13  
14  
15  
16  
17  
18  
19  
20  
21  
22  
23  
24  
25  
26  
27  
28  
29  
30  
31  
32  
33  
34  
35  
36  
37  
38  
39  
40  
41  
42  
43  
44  
45  
46  
47  
48  
49  
50  
51  
52  
53  
54  
55  
56  
57  
58  
59  
60

2

3 Anna Peeters (Head, Obesity and Population Health)<sup>1</sup>, Dianna J Magliano (Head, Diabetes  
4 and Population Health)<sup>1</sup>, Kathryn Backholer (Research Fellow)<sup>1</sup>, Paul Zimmet (Emeritus  
5 Director)<sup>1</sup>, Jonathan E Shaw (Director, Clinical Epidemiology and Diabetes)<sup>1</sup>

6 1 Baker IDI Heart and Diabetes Institute, Melbourne 3004, Victoria, Australia

7

8 Running title: Change in weight and waist gain over time

9

10 Corresponding author:

11 Anna Peeters

12 Obesity and Population Health

13 Baker IDI Heart and Diabetes Institute

14 Commercial Rd

15 Melbourne 3004

16 Australia

17 Phone: +61 3 8532 1928

18 Email: [anna.peeters@bakeridi.edu.au](mailto:anna.peeters@bakeridi.edu.au)

19

1  
2  
3 20 *Data sharing*  
4  
5

6 21 Extra data is available by emailing A Peeters at [anna.peeters@bakeridi.edu.au](mailto:anna.peeters@bakeridi.edu.au)  
7  
8  
9 22

10  
11  
12 23 *Authorship statement*  
13  
14

15 24 AP conceived of the article, executed the analysis and writing of the article and is guarantor  
16  
17 25 for the article. JS, DM and KB contributed to the ideas included within and writing of the  
18  
19 26 article, and provision of data. PZ contributed to the writing of the article and provision of  
20  
21 27 data.  
22  
23  
24  
25  
26  
27

28 29 *Funding*  
29  
30

31 30 This work was supported by VicHealth (Fellowship, AP), the Australian National Preventive  
32  
33 31 Health Agency (Project grant) and Australia Research Council (ARC-linkage grant  
34  
35 32 LP12010041). J.E.S. is supported by a National Health and Medical Research Council  
36  
37 33 Fellowship (586623).  
38

39 34 The AusDiab study, co-coordinated by the Baker IDI Heart and Diabetes Institute, was  
40  
41 35 supported in part by the Victorian Government's OIS Program, and gratefully acknowledges  
42  
43 36 the generous support given by: National Health and Medical Research Council (NHMRC  
44  
45 37 grant 233200), Australian Government Department of Health and Ageing. Abbott Australasia  
46  
47 38 Pty Ltd, Alphapharm Pty Ltd, AstraZeneca, Bristol-Myers Squibb, City Health Centre-  
48  
49 39 Diabetes Service-Canberra, Department of Health and Community Services - Northern  
50  
51 40 Territory, Department of Health and Human Services – Tasmania, Department of Health –  
52  
53 41 New South Wales, Department of Health – Western Australia, Department of Health – South  
54  
55 42 Australia, Department of Human Services – Victoria, Diabetes Australia, Diabetes Australia  
56  
57  
58  
59  
60

1  
2  
3  
4  
5  
6  
7  
8  
9  
10  
11  
12  
13  
14  
15  
16  
17  
18  
19  
20  
21  
22  
23  
24  
25  
26  
27  
28  
29  
30  
31  
32  
33  
34  
35  
36  
37  
38  
39  
40  
41  
42  
43  
44  
45  
46  
47  
48  
49  
50  
51  
52  
53  
54  
55  
56  
57  
58  
59  
60

43 Northern Territory, Eli Lilly Australia, Estate of the Late Edward Wilson, GlaxoSmithKline,  
44 Jack Brockhoff Foundation, Janssen-Cilag, Kidney Health Australia, Marian & FH Flack  
45 Trust, Menzies Research Institute, Merck Sharp & Dohme, Novartis Pharmaceuticals, Novo  
46 Nordisk Pharmaceuticals, Pfizer Pty Ltd, Pratt Foundation, Queensland Health, Roche  
47 Diagnostics Australia, Royal Prince Alfred Hospital, Sydney, Sanofi Aventis, Sanofi  
48 Synthelabo.

For peer review only

1  
2  
3 49 *Article summary*  
4  
5

6 50 *Article focus*  
7  
8

- 9 • We aimed to assess in a single cohort whether change in weight and waist  
10  
11 circumference has changed in recent time periods, independent of age.  
12

13  
14 53 *Key messages*  
15

- 16  
17 • Between 2004/5–2011/2, Australian adults in this national cohort study continued to  
18  
19 gain weight, but more slowly than 1999/2000–2004/5.  
20  
21

- 22  
23 • In contrast waist circumference gain was greater in the most recent period. Important  
24  
25 differences were observed according to area-level socio-economic disadvantage.  
26  
27

- 28 • While weight gain may be slowing, this has not been observed for older men or those  
29  
30 in more disadvantaged groups.  
31  
32

33 60 *Strengths and limitations*  
34  
35

- 36 • Reliably measured data in a single nationally representative cohort in recent time  
37  
38 periods  
39  
40

- 41 • Analyses adjusted and matched for age for comparison between Periods to enable  
42  
43 analysis of changes over time, rather than age  
44  
45

- 46 • Selection and response bias may limit the generalisability of the results to the broader  
47  
48 Australian population  
49  
50

51  
52 67  
53  
54  
55  
56  
57  
58  
59  
60



68 **ABSTRACT**

69 **Objective:** To assess in a single cohort whether annual weight and waist circumference (WC)  
70 change has varied over time.

71 **Design:** Longitudinal cohort study with three surveys, 1– 1999/2000; 2– 2004/2005; 3–  
72 2011/2012. Generalized linear mixed models with random effects were used to compare  
73 annualised weight and WC change between surveys 1 and 2 (Period 1) with that between  
74 surveys 2 and 3 (Period 2). Models were adjusted for age to analyse changes with time rather  
75 than age. Models were additionally adjusted for sex, education status, area-level socio-  
76 economic disadvantage, ethnicity, body mass index, diabetes status, and smoking status.

77 **Setting:** The Australian Diabetes, Obesity and Lifestyle study (AusDiab)- a population-  
78 based, stratified-cluster survey of 11,247 adults aged  $\geq 25$  years.

79 **Participants:** 3,351 Australian adults who attended each of three surveys and had complete  
80 measures of weight, WC and covariates.

81 **Primary outcome measures:** Weight and WC were measured at each survey. Change in  
82 weight and WC was annualised for comparison between the two Periods.

83 **Results:** Mean weight and WC increased in both Periods (0.34kg/y, 0.43cm/y Period 1;  
84 0.13kg/y, 0.46 cm/y Period 2). Annualised weight gain in Period 2 was 0.11kg/year (95% CI  
85 0.06–0.15) less than Period 1. Lesser annual weight gain between the two periods was not  
86 seen for those with greatest area-level socio-economic disadvantage, or in men over the age  
87 of 55. In contrast, the annualised WC increase in Period 2 was greater than Period 1  
88 (0.07cm/year, 95% CI 0.01–0.12). The increase was greatest in males 55+ and those with  
89 greater area-level socio-economic disadvantage.

1  
2  
3 90 **Conclusions:** Between 2004/5–2011/2, Australian adults in a national study continued to gain  
4  
5 91 weight, but more slowly than 1999/2000–2004/5. While weight gain may be slowing, this  
6  
7 92 was not observed for older men or those in more disadvantaged groups, and the same cannot  
8  
9 93 be said for WC.  
10

11  
12 94  
13  
14  
15  
16  
17  
18  
19  
20  
21  
22  
23  
24  
25  
26  
27  
28  
29  
30  
31  
32  
33  
34  
35  
36  
37  
38  
39  
40  
41  
42  
43  
44  
45  
46  
47  
48  
49  
50  
51  
52  
53  
54  
55  
56  
57  
58  
59  
60

For peer review only

1  
2  
3 95 Obesity in adults has increased rapidly over the past few decades, leading to prevalence of  
4  
5 96 over one quarter in many developed countries [1]. There is growing acceptance that strong  
6  
7 97 preventive measures are required to stem the increasing prevalence, with a variety of  
8  
9  
10 98 approaches implemented, ranging from social marketing through whole of community  
11  
12 99 interventions to regulatory strategies.

13  
14  
15 100 There have been some suggestions that obesity prevention interventions in children have had  
16  
17 101 a positive effect, due to the observation that the prevalence of obesity is no longer increasing  
18  
19 102 at the same rate [2] [3]. A recent review of 52 studies, from 25 countries, comparing obesity  
20  
21 103 prevalence at two time points since 1999 [4] concluded that in more developed nations a  
22  
23 104 likely slowing of the rate of increase in obesity prevalence was occurring in children, with a  
24  
25 105 possible turning point around 2000. However, trends in adults in this review generally  
26  
27 106 appeared to be continuing to increase. Since this review, an analysis of US adults through the  
28  
29 107 repeated National Health and Nutrition Examination Surveys (NHANES) between 1999 and  
30  
31 108 2010 suggested no increase in mean body mass index (BMI) or obesity prevalence over that  
32  
33 109 time period in non-Hispanic white and Hispanic women, but continued increases in men and  
34  
35 110 non-Hispanic black and Mexican American women [5]. In Australia, the latest reported data  
36  
37 111 suggests a continued increase in obesity prevalence in adults to 2012 [6]. However,  
38  
39 112 prevalence data is driven by a range of factors, including migration, mortality and response  
40  
41 113 bias. To determine whether the degree of weight gain in the population has slowed over time,  
42  
43 114 a comparison of the rates of weight change is required.

44  
45  
46  
47  
48  
49 115 We aimed to analyse whether the degree of change in weight and waist circumference (WC)  
50  
51 116 over time differed in a single cohort of adults, comparing weight and WC change in the same  
52  
53 117 individuals between two consecutive time periods, adjusting for age. We used the national  
54  
55 118 Australian Diabetes, Obesity and Lifestyle cohort (AusDiab) [7], and compared annualised  
56  
57 119 change in weight and WC between 2000 and 2005 to that between 2005 and 2012.

1  
2  
3 120 **METHODS**  
4  
5

6 121 **Setting and Participants**  
7

8  
9 122 The Australian Diabetes, Obesity and Lifestyle study (AusDiab) is a population-based,  
10  
11 123 stratified-cluster survey of 11, 247 adults aged  $\geq 25$  years, recruited in 1999 -2000  
12  
13 124 (AusDiab1). Methods and response rates have been described previously[7]. Five-year  
14  
15 125 follow-up was conducted in 2004-2005 (AusDiab2) and a 12-year follow-up was conducted  
16  
17 126 in 2012 (AusDiab3). From the original cohort, 6,400 and 4,614 returned for physical  
18  
19 127 examination and interviewer-administered questionnaire at AusDiab2 and AusDiab3,  
20  
21 128 respectively. For this analysis we excluded participants with missing data on weight or WC  
22  
23 129 at any of AusDiab 1, 2 or 3, leaving 3,908 participants. We further excluded those  
24  
25 130 participants missing any of the variables used as covariates at AusDiab 1 or 2, resulting in a  
26  
27 131 final sample size of 3,351. Ethics approval was obtained from the International Diabetes  
28  
29 132 Institute, Monash University, and the Alfred Hospital Melbourne. All participants consented  
30  
31 133 to participate in the study.  
32  
33  
34

35  
36 134 All study assessments followed a similar protocol [8] [7]. Data were collected by  
37  
38 135 interviewer-administered questionnaires on medical history, lifestyle and health behaviour.  
39  
40

41 136 **Outcomes**  
42

43  
44 137 Height was measured without shoes, using a stadiometer and recorded to the nearest 0.5 cm.  
45  
46 138 Weight was measured without shoes, excess clothing, and items in pockets by a single  
47  
48 139 measurement at each survey. Weight at AusDiab1 was measured using a mechanical beam  
49  
50 140 balance. Weight at AusDiab 2 and 3 was measured using digital weighing scales. Weight was  
51  
52 141 recorded to the nearest 0.1 kg. At all surveys, scales were calibrated using 5kg weights prior  
53  
54 142 to each set of measurements. BMI was obtained from the calculation of weight (kg) divided  
55  
56  
57  
58  
59  
60

1  
2  
3 143 by height (m<sup>2</sup>). Annual weight change was calculated as the difference in weight between  
4  
5 144 AusDiab 1 and 2 (Period 1), or AusDiab 2 and 3 (Period 2), divided by the follow-up time  
6  
7 145 between the two consecutive surveys.  
8  
9

10 146 Waist circumference was measured twice, halfway between the lower border of the ribs and  
11  
12 147 the iliac crest on a horizontal plane. If measurements varied by >2 cm, a third was taken; the  
13  
14 148 mean of the two closest measurements was calculated. Annualised WC change was  
15  
16  
17 149 calculated as the difference in WC between AusDiab 1 and 2, or AusDiab 2 and 3, divided by  
18  
19 150 the follow-up time between the two consecutive surveys.  
20  
21

## 22 151 **Co-factors**

23  
24  
25 152 Data on education, country of birth, smoking and physical activity and television  
26  
27 153 viewing habits were obtained by questionnaire. Self-reported cardiovascular disease was  
28  
29 154 ascertained by asking if participants had been told by a doctor or nurse that they had angina,  
30  
31 155 myocardial infarction, or stroke.  
32  
33

34  
35 156 Smoking status was defined as 1) current daily smoker and 2) ex-smoker (smoking less than  
36  
37 157 daily for at least the last 3 months, but used to smoke daily) and non-smoker (never smoked  
38  
39 158 tobacco daily) combined [9] [7].  
40  
41

42 159 Education level was ascertained by asking the question “Which of these describes the highest  
43  
44 160 qualification you have received?” Education was categorised as secondary only (comprising  
45  
46 161 those with a secondary school qualification), diploma (comprising nursing or teaching  
47  
48 162 qualification, trade certificate or undergraduate diploma), and degree (comprising bachelor  
49  
50 163 degree, post-graduate diploma or masters degree/doctorate)[10].  
51  
52

53  
54 164 Area-level socio-economic disadvantage was estimated using the Index of Relative  
55  
56 165 Disadvantage code from the Socio-economic Indexes for Areas (SEIFA). The index was  
57  
58  
59  
60

1  
2  
3 166 developed by the Australian Bureau of Statistics, to create a summary measure from a group  
4  
5 167 of 20 variables (related to education, income, employment, family composition, housing  
6  
7 168 benefits, car ownership, ethnicity, English language proficiency, residential overcrowding)  
8  
9  
10 169 displaying dimensions of social disadvantage [11]. The index is constructed so that high  
11  
12 170 values reflect areas with high socio-economic status (relative advantage) and low values  
13  
14 171 reflect areas with low socio-economic status (relative disadvantage). Tertiles of disadvantage  
15  
16 172 were calculated amongst the final study sample.

17  
18  
19 173 Physical activity was measured via an interviewer-administered Active Australia  
20  
21 174 questionnaire, which considered participation in predominantly leisure-time physical  
22  
23 175 activities (including walking for transport) during the previous week [12]. Total physical  
24  
25 176 activity time was calculated as the sum of the time spent walking (if continuous and for  $\geq 10$   
26  
27 177 minutes) or performing moderate-intensity activity, plus double the time spent in vigorous-  
28  
29 178 intensity physical activity [13].

30  
31  
32  
33 179 Self-reported television viewing time was calculated as the total time spent watching  
34  
35 180 television or videos in the previous week, and is considered a reliable and valid estimate of  
36  
37 181 television viewing time among adults [14].

38  
39  
40  
41 182 Average daily energy intake was assessed using a self-administered food frequency  
42  
43 183 questionnaire (FFQ) [15], which included 74 items (with 10 frequency options), with  
44  
45 184 additional questions on food habits, portion size and consumption of alcoholic beverages. In  
46  
47 185 AusDiab1, blood pressure was measured using a standard mercury sphygmomanometer in the  
48  
49 186 state of Victoria only and by Dinamap elsewhere. To account for any effect due to differential  
50  
51 187 measurement error, manual blood pressure measurements were adjusted as previously  
52  
53 188 described [16]. In AusDiab 2 and 3, blood pressure was measured by an Omron machine.  
54  
55  
56  
57  
58  
59  
60

189 Fasting serum total cholesterol was measured with an Olympus AU600 analyser (Olympus  
190 Optical, Tokyo, Japan) at a central laboratory [17].

191 Classification of diabetes status has been described elsewhere [17]. Briefly, participants were  
192 classified as having 'known diabetes' if they reported having doctor diagnosed diabetes and  
193 were either taking hypoglycaemic medication or had fasting plasma glucose (FPG)  
194  $\geq 7.0$ mmol/L or a 2-hour plasma glucose (PG)  $\geq 11.1$ mmol/L. Participants not reporting  
195 diabetes but with FPG  $\geq 7.0$ mmol/L or 2-hour PG  $\geq 11.1$ mmol/L were classified as having  
196 'newly diagnosed diabetes'.

### 197 **Statistical analysis**

198 Baseline characteristics (means and proportions at AusDiab1) were compared between  
199 AusDiab participants with and without complete measures at AusDiab 1, 2 and 3.  
200 Characteristics of the included population were also compared in 2000 and 2005,  
201 representing the two baseline surveys for the two weight change periods.

202 The difference in annualised weight and WC change in Period 1 (2000 to 2005), compared to  
203 Period 2 (2005 and 2012), was assessed using linear regression analysis. Generalized linear  
204 mixed models with random effects were used to analyse the association between study period  
205 on annual weight or WC change. This model includes random effects associated with both  
206 the cluster and the units of analysis (participants) to take the clustered structure of the data  
207 into account and to allow the residuals associated with the longitudinal measures on the same  
208 unit of analysis to be correlated. Models were adjusted sequentially for age and sex, (Model  
209 1), additionally adjusting for smoking, education, area level disadvantage and country of birth  
210 (Model 2), additionally adjusting for baseline BMI and diabetes status (Model 3), and  
211 additionally adjusting for baseline TV time, exercise time, and energy intake (Model 4).  
212 Baseline refers to the variables measured at AusDiab1 for change in Period 1, and AusDiab2  
213 for change in Period 2. Adjustment for age enables the differences in weight and WC change

1  
2  
3 214 observed between the two Periods to be attributed to time rather than age. The association  
4  
5 215 between study period and annualised weight and WC change was also analysed across sub-  
6  
7 216 groups and interaction terms between study period with age or sex were analysed.

8  
9  
10 217 The primary analyses were repeated after excluding the few participants with annual weight  
11  
12 218 change greater than 5 kg/y or less than -5 kg/y, and restricting participants to the overlapping  
13  
14 219 age group of 30–80.

15  
16 220 All analyses were performed in STATA (version 11.0), with statistical significance set at the  
17  
18 221 5% level.

19  
20  
21 222  
22  
23  
24  
25  
26  
27  
28  
29  
30  
31  
32  
33  
34  
35  
36  
37  
38  
39  
40  
41  
42  
43  
44  
45  
46  
47  
48  
49  
50  
51  
52  
53  
54  
55  
56  
57  
58  
59  
60



1  
2  
3 223 **RESULTS**  
4  
5

6 224 The population with complete measures was similar to the total AusDiab cohort with respect  
7  
8 225 to sex and weight, but was younger, with higher educational attainment, and a higher  
9  
10 226 prevalence of never smoking (Table 1). The population with complete measures also had a  
11  
12 227 lower prevalence of chronic disease. There was no appreciable difference between the two  
13  
14 228 groups for weight change in Period 1 after adjustment for differences in age and sex.  
15  
16

17  
18 229 (Table 1 here)  
19

20  
21 230 Participant characteristics in 2000 and 2005 were compared (Table 2). In 2005, in addition to  
22  
23 231 being five years older, the population had a higher prevalence of diabetes (predominantly  
24  
25 232 type 2). In both periods the average change in weight and WC was a gain. In Period 2, a  
26  
27 233 smaller proportion of the population gained weight and annualised weight gain was less, at  
28  
29 234 0.13 kg/year compared to 0.34 kg/year in Period 1. This difference resulted from a lesser  
30  
31 235 weight change across the entire distribution of weight change in Period 2, with minimal  
32  
33 236 difference at the 5<sup>th</sup> percentile, increasing to a difference of 0.50kg/year at the 95<sup>th</sup> percentile  
34  
35 237 of weight change (Appendix Figure 1A). For WC, there was no difference in the crude  
36  
37 238 annualised change between the two periods (Table 2). In contrast to weight change, this  
38  
39 239 resulted from both a smaller gain in those whose WC increased and a smaller loss in those  
40  
41 240 whose WC decreased (Appendix Figure 1B). The correlation between weight and WC change  
42  
43 241 was 0.69 (0.68 in Period 1, and 0.71 in Period 2).  
44  
45  
46  
47

48 242 (Table 2 here)  
49

50  
51 243 Comparison of the crude annualised weight change for matching 10-year age-groups in  
52  
53 244 Periods 1 and 2 indicated a smaller weight gain in Period 2 for most age and sex groups,  
54  
55 245 although these differences were only significant for men aged 35–44, and women 45–54 and  
56  
57  
58  
59  
60

1  
2  
3 246 65–74 (Table 3). Comparison of the crude annualised WC change for matching age-groups in  
4  
5 247 Periods 1 and 2 indicated no difference in WC gain between the two periods for women and a  
6  
7 248 generally larger WC gain in Period 2 for men (significant for men aged 45–54 and 55–64;  
8  
9 249 Table 3).

10  
11  
12 250 (Table 3 here)

13  
14  
15 251 The difference in annualised weight and WC change in Period 2, compared to Period 1, was  
16  
17 252 assessed using linear regression analysis (Table 4). In Period 2, annualised weight gain was  
18  
19 253 0.11 kg/year (95% CI 0.06, 0.15) less than in Period 1. This did not alter substantially after  
20  
21 254 further adjustment for smoking status, education status, ethnicity, area-level socio-economic  
22  
23 255 disadvantage, baseline BMI and diabetes status (Table 4A), nor after adjustment for TV time,  
24  
25 256 exercise time and energy intake (results not shown).

26  
27  
28  
29 257 Annualised weight gain in Period 2 was less than in Period 1 for most sub-groups (Table 4A),  
30  
31 258 with suggestions of a greater difference over time in women, and those aged under 55 years  
32  
33 259 (although no interaction tests on these factors were significant). Annualised weight gain in  
34  
35 260 Period 2 was non-significantly less than in Period 1 for those with high educational  
36  
37 261 attainment (borderline significant), obesity, and those from a non-English speaking  
38  
39 262 background. No difference in annualised weight gain between the two periods was observed  
40  
41 263 for those in the tertile of greatest area-level socio-economic disadvantage, nor for current  
42  
43 264 smokers.

44  
45  
46  
47  
48 265 In Period 2, annualised WC gain was 0.07 cm/year more than in Period 1 (Table 4B). This  
49  
50 266 did not alter substantially after further adjustment for smoking status, education status, area-  
51  
52 267 level socio-economic disadvantage, ethnicity, baseline BMI and diabetes status (Table 4B),  
53  
54 268 nor after adjustment for TV time, exercise time and energy intake (results not shown).

1  
2  
3 269 In stratified analyses no difference in annualised WC gain between the two periods was  
4  
5 270 observed for women, those aged <55 years, those in the highest education group, those with  
6  
7 271 normal weight nor ex-smokers. Annualised WC gain was less in Period 2 than Period 1 for  
8  
9 272 those in the tertile of least area-level socio-economic disadvantage (-0.14cm/year 95%CI -  
10  
11 273 .05, -0.23).

12  
13  
14 274 (Table 4 here)

15  
16  
17  
18 275 For both weight and WC, there was an apparent combined sex and age effect, such that older  
19  
20 276 men had the least favourable changes over time (Figure 1).

21  
22  
23 277 The primary analyses were repeated after excluding the few participants with annual weight  
24  
25 278 change greater than 5 kg/y or less than -5 kg/y, and restricting participants to the overlapping  
26  
27 279 age group of 30–80. No differences in results were seen.

28  
29  
30  
31 280

32  
33  
34 281

## 35 36 282 **DISCUSSION**

37  
38  
39 283 In this analysis of a single cohort of Australian adults, weight and WC increased in the most  
40  
41 284 recent period in all population sub-groups examined. Age-adjusted annualised weight gain  
42  
43 285 between 2005–2012 was less than between 1999/2000–2005, but annualised WC gain was  
44  
45 286 greater. Lesser weight gain over time was not seen in older men or those with greatest area-  
46  
47 287 level socio-economic disadvantage.

48  
49  
50  
51 288

52  
53  
54 289 The lack of difference in weight and WC change between the two periods observed for  
55  
56 290 current smokers, those from a non-English speaking background and those with obesity, is

1  
2  
3 291 likely to reflect small sample sizes in these groups. In general, adjustment for covariates had  
4  
5 292 little effect on the observed associations between study period and weight and WC change.  
6  
7 293 As time spent watching TV, exercise and energy intake might be expected to be mediating  
8  
9 294 much of the observed changes, we had expected an observable reduction in the difference  
10  
11 295 between study periods after adjustment for these factors. The lack of impact after adjustment  
12  
13 296 likely reflects that they are relatively blunt instruments to detect small changes in behaviour  
14  
15 297 over time. The self-reported nature of these behavioural questionnaires is associated with  
16  
17 298 both differential and non-differential error [18] [19]. While validated, the FFQ is has a  
18  
19 299 limited list of foods and is affected by the inability of individuals to accurately report their  
20  
21 300 food intake retrospectively over a long period of time [20]. Further the Active Australia  
22  
23 301 questionnaire only refers to leisure time activity and TV watching is only one component of  
24  
25 302 sitting time.  
26  
27  
28  
29 303  
30 304 The general observation that weight gain may be lessening over time supports the cross-  
31  
32 305 sectional time series observations of a plateau in the prevalence of obesity and rate of change  
33  
34 306 in BMI [4]. However, these results also suggest that the general observations do not tell the  
35  
36 307 whole story, with large differences between different population subgroups, and a contrasting  
37  
38 308 observation for waist circumference. The sex differences observed here are similar to the  
39  
40 309 cross-sectional trends reported for American adults for whom a clear plateau in obesity  
41  
42 310 prevalence has been observed for women but not men [5]. The differences we observed  
43  
44 311 according to level of area-level socio-economic disadvantage also reflect findings from the  
45  
46 312 review of obesity trends in which the levelling off of obesity was generally more pronounced  
47  
48 313 in groups with higher socio-economic position [4]. It will be important to do a similar  
49  
50 314 analysis in a longitudinal children's cohort, as their experience is likely to differ from that of  
51  
52 315 adults. Children have been exposed to a wide range of obesity prevention interventions,  
53  
54  
55  
56  
57  
58  
59  
60

1  
2  
3 316 particularly in schools, in countries such as Australia and cross-sectional trends clearly  
4  
5 317 suggest a plateauing in the prevalence of obesity in children [4].  
6  
7  
8 318 The observation that rates of WC change may be continuing to increase even as rates of  
9  
10 319 weight change decrease may reflect prior findings using the NHANES data that WC is  
11  
12 320 increasing to a greater extent than expected from changes in weight [21] [22]. While we  
13  
14 321 observed changes in weight and WC to be highly correlated these results combined suggest a  
15  
16 322 preferential increase in abdominal adiposity over time, which is thought to be associated with  
17  
18 323 greater risk of cardio-metabolic outcomes [23]. The potential implication that current  
19  
20 324 bodyweight trends are leading a more metabolically active obesity, with increased risks for  
21  
22 325 outcomes such as diabetes, hypertension and cardiovascular disease warrants further  
23  
24 326 investigation.  
25  
26  
27

28  
29 327 The key strength of the current study is that for the first time it addresses this important  
30  
31 328 question through an analysis of the same cohort of adults over two distinct but recent time  
32  
33 329 periods, independent of the effects of ageing. In doing this, conclusions can be drawn about  
34  
35 330 the changes over time independent of unmeasurable differences in cohorts. Other strengths  
36  
37 331 include the national population sampling strategy of the AusDiab cohort and the measured  
38  
39 332 weight and WC at each study wave.  
40  
41  
42

43 333 The potential limitation of the current study is the lack of generalisability of the included  
44  
45 334 cohort. As with all cohort studies, the AusDiab cohort is a selected population, and those who  
46  
47 335 attended all three waves are more select again, with higher educational attainment and a  
48  
49 336 lower prevalence of chronic disease and risk factors. It is possible that a generally more  
50  
51 337 healthy and health conscious population has a stronger response to population health  
52  
53 338 messages, and consequently the lesser weight gain observed here in consecutive age cohorts  
54  
55 339 over time may be greater than would be observed for the general population. However, the  
56  
57  
58  
59  
60

1  
2  
3 340 current observations lend support to the concept that weight gain is decreasing over time in  
4  
5 341 the population, even if the AusDiab cohort represents a particularly sensitive indicator. One  
6  
7 342 further potential limitation is the use of different weighing scales at AusDiab 2 and 3  
8  
9  
10 343 compared to AusDiab1. Although all scales were calibrated in the same way at each survey  
11  
12 344 wave, differences in variability between the scales may have led to more variability in the  
13  
14 345 change in weight in Period 1 than Period 2.

15  
16  
17 346 The results also suggest there is no room for complacency in obesity prevention. The rates of  
18  
19 347 overweight and obesity remain high, the average change in weight and WC remains an  
20  
21 348 increase and there is no reduction in the rate of WC gain. Further, no decrease in the rate of  
22  
23 349 weight or WC change were observed in older men. Finally, the observation that no decrease  
24  
25 350 in rates of weight and WC change is being seen by those living in the most socially  
26  
27  
28 351 disadvantaged neighbourhoods suggests current trends are likely to lead to an increase in the  
29  
30 352 social inequalities in obesity, and consequent ill health [24]. It is critical that further studies  
31  
32 353 are conducted to confirm these findings and that we work to identify the causes of the  
33  
34 354 observed changes, including the differences observed in specific population sub-groups.

35  
36  
37  
38 355 In summary, between 2004/5 and 2011/2 Australian adults continued to gain weight: WC at a  
39  
40 356 faster rate than between 1999/2000 and 2004/4, and weight at a slower rate. While weight  
41  
42 357 gain may be slowing, it does not appear to be affecting older men or those in more  
43  
44 358 disadvantaged groups, and the same cannot be said for WC.

45  
46  
47  
48 359

49  
50  
51 360

52  
53  
54 361

55  
56  
57 362

1  
2  
3  
4  
5  
6  
7  
8  
9  
10  
11  
12  
13  
14  
15  
16  
17  
18  
19  
20  
21  
22  
23  
24  
25  
26  
27  
28  
29  
30  
31  
32  
33  
34  
35  
36  
37  
38  
39  
40  
41  
42  
43  
44  
45  
46  
47  
48  
49  
50  
51  
52  
53  
54  
55  
56  
57  
58  
59  
60

363 **Acknowledgements**

364 The authors would like to acknowledge all AusDiab participants, investigators and sponsors.

365 The authors would like to acknowledge Parneet Sethi for useful discussions on this work.

366

For peer review only

367 **References**

- 368 1. International Association for the Study of Obesity. Obesity the global epidemic. Secondary  
369 Obesity the global epidemic 2013.  
370 <http://www.iaso.org/iotf/obesity/obesitytheglobalepidemic/>.
- 371 2. Stamatakis E, Zaninotto P, Falaschetti E, Mindell J, Head J. Time trends in childhood and  
372 adolescent obesity in England from 1995 to 2007 and projections of prevalence to  
373 2015. *J Epidemiol Community Health* 2010;**64**(2):167-74 doi:  
374 10.1136/jech.2009.098723[published Online First: Epub Date]].
- 375 3. Sundblom E, Petzold M, Rasmussen F, Callmer E, Lissner L. Childhood overweight and  
376 obesity prevalences levelling off in Stockholm but socioeconomic differences persist.  
377 *Int J Obes (Lond)* 2008;**32**(10):1525-30 doi: 10.1038/ijo.2008.104[published Online  
378 First: Epub Date]].
- 379 4. Rokholm B, Baker JL, Sorensen TI. The levelling off of the obesity epidemic since the  
380 year 1999--a review of evidence and perspectives. *Obes Rev* 2010;**11**(12):835-46 doi:  
381 10.1111/j.1467-789X.2010.00810.x[published Online First: Epub Date]].
- 382 5. Flegal KM, Carroll MD, Kit BK, Ogden CL. Prevalence of obesity and trends in the  
383 distribution of body mass index among US adults, 1999-2010. *JAMA*  
384 2012;**307**(5):491-7 doi: 10.1001/jama.2012.39[published Online First: Epub Date]].
- 385 6. Statistics ABo. Australian Health Survey: First Results, 2011-12. Canberra: Australian  
386 Bureau of Statistics, 2012.
- 387 7. Dunstan DW, Zimmet PZ, Welborn TA, et al. The Australian Diabetes, Obesity and  
388 Lifestyle Study (AusDiab)--methods and response rates. *Diabetes Res Clin Pract*  
389 2002;**57**(2):119-29
- 390 8. Cameron AJ, Welborn TA, Zimmet PZ, et al. Overweight and obesity in Australia: the  
391 1999-2000 Australian Diabetes, Obesity and Lifestyle Study (AusDiab). *Med J Aust*  
392 2003;**178**(9):427-32
- 393 9. Risk Factor Prevalence Management Committee. Risk factor prevalence study No.3, 1989:  
394 National Heart Foundation and Australian Institute of Health, 1990.
- 395 10. Williams ED, Magliano DJ, Zimmet PZ, et al. Area-level socioeconomic status and  
396 incidence of abnormal glucose metabolism: the Australian Diabetes, Obesity and  
397 Lifestyle (AusDiab) study. *Diabetes Care* 2012;**35**(7):1455-61 doi: 10.2337/dc11-  
398 1410[published Online First: Epub Date]].



- 1  
2  
3 399 11. Statistics ABo. Information Paper - Census of Population and Housing: Socio-Economic  
4 400 Indexes for Areas Australia 2001. : Australian Bureau of Statistics, 2001.  
5  
6 401 12. Australian Institute of Health and Welfare. The Active Australia Survey. A guide and  
7  
8 402 manual for implementation, analysis and reporting. Canberra: Australian Institute of  
9  
10 403 Health and Welfare, 2003.  
11 404 13. Armstrong T, Bauman A, Davies J. Physical activity patterns of Australian adults. Results  
12 405 of the 1999 National Physical Sctivity Survey. Australian Institute of Health and  
13 406 Welfare cat No CVD10. Canberra: Australian Institute of Health and Welfare, 2000.  
14  
15 407 14. Salmon J, Bauman A, Crawford D, Timperio A, Owen N. The association between  
16 408 television viewing and overweight among Australian adults participating in varying  
17 409 levels of leisure-time physical activity. *Int. J. Obes. Relat. Metab. Disord.*  
18 410 *2000;24:600-6*  
19  
20 411 15. Ireland P, Jolley D, Giles G, et al. Development of the Melbourne FFQ: A food frequency  
21 412 questionnaire for use in an Australian prospective study involving an ethnically  
22 413 diverse cohort. *Asia Pacific J Clin Nutr* 1994;**3**:19-31  
23  
24 414 16. Briganti EM, Shaw JE, Chadban SJ, et al. Untreated hypertension among Australian  
25 415 adults: the 1999-2000 Australian Diabetes, Obesity and Lifestyle Study (AusDiab).  
26 416 *Med J Aust* 2003;**179**(3):135-9  
27  
28 417 17. Magliano DJ, Barr EL, Zimmet PZ, et al. Glucose indices, health behaviors, and  
29 418 incidence of diabetes in Australia: the Australian Diabetes, Obesity and Lifestyle  
30 419 Study. *Diabetes Care* 2008;**31**(2):267-72 doi: 10.2337/dc07-0912[published Online  
31 420 First: Epub Date]].  
32  
33 421 18. Hebert JR, Hurley TG, Peterson KE, et al. Social desirability trait influences on self-  
34 422 reported dietary measures among diverse participants in a multicenter multiple risk  
35 423 factor trial. *J Nutr* 2008;**138**(1):226S-34S  
36  
37 424 19. Booth ML, Owen N, Bauman AE, Gore CJ. Retest reliability of recall measures of  
38 425 leisure-time physical activity in Australian adults. *Int J Epidemiol* 1996;**25**(1):153-9  
39  
40 426 20. Dodd KW, Guenther PM, Freedman LS, et al. Statistical methods for estimating usual  
41 427 intake of nutrients and foods: a review of the theory. *J Am Diet Assoc*  
42 428 *2006;106*(10):1640-50 doi: 10.1016/j.jada.2006.07.011[published Online First: Epub  
43 429 Date]].  
44  
45 430 21. Elobeid MA, Desmond RA, Thomas O, Keith SW, Allison DB. Waist circumference  
46 431 values are increasing beyond those expected from BMI increases. *Obesity (Silver*  
47  
48  
49  
50  
51  
52  
53  
54  
55  
56  
57  
58  
59  
60

- 1  
2  
3 432 Spring) 2007;**15**(10):2380-3 doi: 15/10/2380 [pii]10.1038/oby.2007.282[published  
4 433 Online First: Epub Date]].  
5  
6  
7 434 22. Walls HL, Stevenson CE, Mannan HR, et al. Comparing trends in BMI and waist  
8 435 circumference. *Obesity (Silver Spring)* 2011;**19**(1):216-9 doi: oby2010149 [pii  
9 436 10.1038/oby.2010.149[published Online First: Epub Date]].  
10  
11  
12  
13 437 23. Welborn TA, Dhaliwal SS, Bennett SA. Waist-hip ratio is the dominant risk factor  
14 438 predicting cardiovascular death in Australia. *Med J Aust* 2003;**179**(11-12):580-5  
15  
16 439 24. Backholer K, Mannan HR, Magliano D, et al. Projected socioeconomic disparities in the  
17 440 prevalence of obesity amongst Australian adults. *Australian and New Zealand Journal*  
18 441 *of Public Health* 2012;**in press**  
19  
20  
21  
22 442  
23  
24 443  
25  
26  
27  
28  
29  
30  
31  
32  
33  
34  
35  
36  
37  
38  
39  
40  
41  
42  
43  
44  
45  
46  
47  
48  
49  
50  
51  
52  
53  
54  
55  
56  
57  
58  
59  
60

1  
2  
3  
4  
5  
6  
7  
8  
9  
10  
11  
12  
13  
14  
15  
16  
17  
18  
19  
20  
21  
22  
23  
24  
25  
26  
27  
28  
29  
30  
31  
32  
33  
34  
35  
36  
37  
38  
39  
40  
41  
42  
43  
44  
45  
46  
47  
48  
49  
50  
51  
52  
53  
54  
55  
56  
57  
58  
59  
60

444  
445  
446  
447  
448  
449  
450  
451  
452

**Figures**

Figure 1. Difference in annualised change in weight (kg/year) or waist circumference (cm/year) between Period 2 and Period 1, by age and sex. Adjusted for age.

For peer review only

453 **Tables**

454 **Table 1** Comparison of characteristics in 1999/2000 between the included and excluded  
 455 population

| Baseline characteristics                      | Included    | Excluded    |
|-----------------------------------------------|-------------|-------------|
| n                                             | 3351        | 7896        |
| Sex (% men)                                   | 45          | 45          |
| Age (mean, y)*                                | 49 (11)     | 52 (16)     |
| Education (% post high school)*               | 67          | 56          |
| Area-level disadvantage (% in lowest tertile) | 25          | 36          |
| Born in Australia or New Zealand (%)          | 80          | 74          |
| Never smoker (%)*                             | 63          | 51          |
| Weight (mean, kg)                             | 76 (16)     | 78 (17)     |
| Waist circumference (mean, cm)                | 89 (13)     | 92 (14)     |
| Energy intake (mean, kj/day)                  | 8225 (3112) | 8137 (3566) |
| TV viewing time (mean, minutes/week)          | 703 (512)   | 829 (613)   |
| Exercise Time (mean, minutes/week)            | 283 (329)   | 269 (332)   |
| Diabetes (%)*                                 | 4.9         | 10.1        |
| Coronary heart disease (%)*                   | 2           | 5           |
| Hypertension (%)                              | 23          | 29          |
| High blood cholesterol (%)                    | 26          | 25          |

456 Notes: data are % or mean (SD) \*Indicates a significant difference (p<0.05)

**Table 2** Characteristics of the cohort in 1999/2000 and 2005

| <b>Cross-sectional characteristics</b> | <b>2000</b>     | <b>2005</b>     |
|----------------------------------------|-----------------|-----------------|
| Age (mean, y)*                         | 49.3 (11.1)     | 54.3 (11.1)     |
| Weight (mean, kg)                      | 76.2 (15.6)     | 77.9 (16.3)     |
| Waist circumference (mean, cm)         | 89.4 (13.4)     | 91.6 (13.6)     |
| Smoking status (% never)               | 63              | 61              |
| Diabetes (%)                           | 4.9             | 6.4             |
| Exercise time (mean, minutes/week)*    | 283 (330)       | 306 (338)       |
| TV time (mean, minutes/week)*          | 703 (512)       | 764 (539)       |
| Energy intake (mean, kj/day)*          | 8225 (3112)     | 7681 (2998)     |
| <b>Changes during follow-up</b>        | <b>Period 1</b> | <b>Period 2</b> |
| Weight change (mean, kg)               | 1.7 (5.2)       | 0.9 (6.1)       |
| Waist circumference change (mean, cm)  | 2.1 (6.2)       | 3.2 (6.9)       |
| Follow-up (mean, y)*                   | 5.0 (0.15)      | 6.9 (0.34)      |
| Proportion gaining weight (%)*         | 64.5            | 56.8            |
| Annualised weight change (mean, kg/y)* | 0.34 (1.04)     | 0.13 (0.89)     |
| Annualised WC change (mean, cm/y)      | 0.43 (1.25)     | 0.46 (1.00)     |

Notes: Data are % or mean (SD) \*Indicates a significant difference (p<0.05)

**Table 3** Comparison of annualised weight and waist circumference change between Period 1 and Period 2 for matching age groups.

| Sex   | Age group | Difference in annualised weight change | Difference in annualised waist circumference change |
|-------|-----------|----------------------------------------|-----------------------------------------------------|
| Men   |           |                                        |                                                     |
|       | 25-34     | -0.08 (-0.5, 0.35)                     | -0.10 (-0.53, 0.32)                                 |
|       | 35-44     | -0.18 (-0.34, -0.02)*                  | 0.12 (-0.06, 0.30)                                  |
|       | 45-54     | -0.10 (-0.22, 0.01)                    | 0.13 (0.01, 0.26)                                   |
|       | 55-64     | -0.03 (-0.1, 0.16)                     | 0.20 (0.05, 0.34)                                   |
|       | 65-74     | -0.12 (-0.26, 0.02)                    | 0.05 (-0.12, 0.23)                                  |
|       | 75+       | 0.27 (-0.10, 0.65)                     | 0.26 (-0.19, 0.72)                                  |
| Women |           |                                        |                                                     |
|       | 25-34     | -0.08 (-0.46, 0.31)                    | -0.05 (-0.47, 0.37)                                 |
|       | 35-44     | -0.12 (-0.26, 0.03)                    | -0.02 (-0.19, 0.16)                                 |
|       | 45-54     | -0.15 (-0.26, -0.04)*                  | -0.01 (-0.14, 0.12)                                 |
|       | 55-64     | -0.09 (-0.20, 0.02)                    | 0.08 (-0.07, 0.23)                                  |
|       | 65-74     | -0.34 (-0.50, -0.17)*                  | -0.08 (-0.31, 0.16)                                 |
|       | 75+       | 0.02 (-0.37, 0.41)                     | 0.27 (-0.32, .85)                                   |

\*Indicates a significant difference ( $p < 0.05$ )

1  
2  
3  
4  
5  
6  
7  
8  
9  
10  
11  
12  
13  
14  
15  
16  
17  
18  
19  
20  
21  
22  
23  
24  
25  
26  
27  
28  
29  
30  
31  
32  
33  
34  
35  
36  
37  
38  
39  
40  
41  
42  
43  
44  
45  
46  
47  
48  
49

**Table 4** Difference in annualised change in weight (kg/year) (A) and waist circumference (cm/year) (B) in Period 2 compared to Period 1

(A)

|                                                      | Sample size | Annualised weight change in Period 1 | Difference in annualised change in Period 2 compared to change in Period 1 |                      |                      |
|------------------------------------------------------|-------------|--------------------------------------|----------------------------------------------------------------------------|----------------------|----------------------|
|                                                      |             |                                      | Model 1                                                                    | Model 2              | Model 3              |
| Total Population                                     | 3351        | 0.34 (0.30-0.37)                     | -0.11 (-0.15--0.06)*                                                       | -0.10 (-0.15--0.06)* | -0.10 (-0.15--0.06)* |
| Men                                                  | 1503        | 0.29 (0.24-0.34)                     | -0.08 (-0.14--0.01)*                                                       | -0.07 (-0.14--0.01)* | -0.08 (-0.15--0.01)* |
| Women                                                | 1848        | 0.37 (0.32-0.42)                     | -0.13 (-0.20--0.07)*                                                       | -0.13 (-0.19--0.06)* | -0.13 (-0.19--0.06)* |
| Age<55                                               | 2311        | 0.46 (0.41-0.50)                     | -0.12 (-0.19--0.06)*                                                       | -0.12 (-0.18--0.06)* | -0.13 (-0.19--0.06)* |
| Age>=55                                              | 1040        | 0.07 (0.01-0.12)                     | -0.08 (-0.15--0.02)*                                                       | -0.08 (-0.15--0.01)* | -0.07 (-0.14--0.01)* |
| Education- secondary & trade certificate             | 2073        | 0.34 (0.30-0.39)                     | -0.13 (-0.19--0.07)*                                                       | -0.13 (-0.19--0.07)* | -0.13 (-0.19--0.07)* |
| Education- diploma & degree                          | 1278        | 0.32 (0.27-0.38)                     | -0.07 (-0.14-0.00)                                                         | -0.07 (-0.14-0.00)   | -0.06 (-0.14-0.01)   |
| Area level disadvantage-tertile of most disadvantage | 1096        | 0.31 (0.24-0.37)                     | -0.01 (-0.09-0.07)                                                         | -0.01 (-0.09-0.07)   | -0.01 (-0.10-0.07)   |
| Area level disadvantage-middle tertile               | 1130        | 0.40 (0.34-0.47)                     | -0.23 (-0.31--0.14)*                                                       | -0.22 (-0.31--0.14)* | -0.22 (-0.31--0.14)* |
| Area level disadvantage-tertile of least             | 1125        | 0.30 (0.24-0.35)                     | -0.08 (-0.16--0.01)*                                                       | -0.08 (-0.15--0.00)* | -0.08 (-0.15--0.00)* |

|                                          |      |                  |                      |                      |                      |
|------------------------------------------|------|------------------|----------------------|----------------------|----------------------|
| disadvantage                             |      |                  |                      |                      |                      |
| Normal weight                            | 1342 | 0.4 (0.36-0.44)  | -0.07 (-0.13--0.01)* | -0.07 (-0.13--0.01)* | -0.08 (-0.14--0.02)* |
| Overweight                               | 1375 | 0.31 (0.26-0.37) | -0.12 (-0.18--0.05)* | -0.11 (-0.18--0.04)* | -0.12 (-0.19--0.05)* |
| Obese                                    | 633  | 0.25 (0.14-0.36) | -0.13 (-0.26-0.01)*  | -0.13 (-0.26-0.01)*  | -0.15 (-0.29--0.01)* |
| English speaking<br>country of birth     | 3129 | 0.34 (0.30-0.37) | -0.10 (-0.15--0.06)* | -0.1 (-0.15--0.05)*  | -0.1 (-0.15--0.05)*  |
| Non-English speaking<br>country of birth | 222  | 0.32 (0.18-0.46) | -0.15 (-0.32-0.02)   | -0.14 (-0.32-0.04)   | -0.15 (-0.33-0.03)   |
| Never smokers                            | 2121 | 0.34 (0.29-0.38) | -0.10 (-0.15--0.04)* | -0.1 (-0.15--0.04)*  | -0.10 (-0.15--0.04)* |
| Ex smokers                               | 894  | 0.27 (0.20-0.34) | -0.15 (-0.24--0.06)* | -0.15 (-0.24--0.06)* | -0.16 (-0.25--0.07)* |
| Current smokers                          | 336  | 0.49 (0.36-0.63) | -0.01 (-0.20-0.19)   | 0.00 (-0.20-0.20)    | 0.00 (-0.20-0.19)    |
| No chronic disease#                      | 1944 | 0.42 (0.37-0.47) | -0.10 (-0.16--0.04)* | -0.10 (-0.16--0.04)* | -0.09 (-0.15--0.03)* |
| Chronic disease#                         | 1407 | 0.25 (0.20-0.30) | -0.12 (-0.19--0.05)* | -0.11 (-0.19--0.04)* | -0.10 (-0.17--0.02)* |

(B)

|                  | Sample size | Annualised WC change<br>in Period 1 | Difference in annualised change in Period 2 compared to<br>change in Period 1 |                   |                   |
|------------------|-------------|-------------------------------------|-------------------------------------------------------------------------------|-------------------|-------------------|
|                  |             |                                     | Model 1                                                                       | Model 2           | Model 3           |
| Total Population | 3351        | 0.43 (0.39-0.48)                    | 0.07 (0.02-0.12)*                                                             | 0.07 (0.02-0.13)* | 0.07 (0.01-0.12)* |
| Men              | 1503        | 0.32 (0.26-0.38)                    | 0.13 (0.05-0.20)*                                                             | 0.13 (0.06-0.21)* | 0.12 (0.05-0.20)* |



|    |                                  |      |                  |                          |                          |                          |
|----|----------------------------------|------|------------------|--------------------------|--------------------------|--------------------------|
| 1  |                                  |      |                  |                          |                          |                          |
| 2  |                                  |      |                  |                          |                          |                          |
| 3  |                                  |      |                  |                          |                          |                          |
| 4  |                                  |      |                  |                          |                          |                          |
| 5  | Women                            | 1848 | 0.53 (0.47-0.59) | 0.02 (-0.06-0.10)        | 0.03 (-0.05-0.11)        | 0.02 (-0.05-0.10)        |
| 6  |                                  |      |                  |                          |                          |                          |
| 7  | Age<55                           | 2311 | 0.50 (0.45-0.55) | 0.05 (-0.03-0.12)        | 0.05 (-0.02-0.13)        | 0.05 (-0.03-0.12)        |
| 8  |                                  |      |                  |                          |                          |                          |
| 9  | Age>=55                          | 1040 | 0.28 (0.21-0.35) | 0.10 (0.02-0.18)*        | 0.10 (0.02-0.19)*        | 0.10 (0.02-0.18)*        |
| 10 |                                  |      |                  |                          |                          |                          |
| 11 | Education- secondary & trade     |      |                  |                          |                          |                          |
| 12 | certificate                      | 2073 | 0.44 (0.39-0.49) | 0.09 (0.02-0.15)*        | 0.09 (0.02-0.16)*        | 0.08 (0.01-0.15)*        |
| 13 |                                  |      |                  |                          |                          |                          |
| 14 | Education- diploma & degree      | 1278 | 0.43 (0.36-0.50) | 0.05 (-0.04-0.14)        | 0.05 (-0.04-0.14)        | 0.05 (-0.04-0.14)        |
| 15 |                                  |      |                  |                          |                          |                          |
| 16 |                                  |      |                  |                          |                          |                          |
| 17 | Area level disadvantage- tertile | 1096 | 0.41 (0.34-0.49) | 0.13 (0.04-0.23)*        | 0.13 (0.04-0.23)*        | 0.14 (0.04-0.23)*        |
| 18 | of most disadvantage             |      |                  |                          |                          |                          |
| 19 | Area level disadvantage-         | 1130 | 0.32 (0.24-0.40) | 0.21 (0.11-0.31)*        | 0.22 (0.12-0.32)*        | 0.22 (0.12-0.32)*        |
| 20 | middle tertile                   |      |                  |                          |                          |                          |
| 21 | Area level disadvantage- tertile |      |                  |                          |                          |                          |
| 22 | of least disadvantage            | 1125 | 0.57 (0.50-0.64) | -0.14 (-0.23--<br>0.05)* | -0.13 (-0.22--<br>0.05)* | -0.15 (-0.23--<br>0.06)* |
| 23 |                                  |      |                  |                          |                          |                          |
| 24 | Normal weight                    | 1342 | 0.48 (0.42-0.54) | 0.04 (-0.04-0.12)        | 0.04 (-0.04-0.12)        | 0.03 (-0.05-0.12)        |
| 25 |                                  |      |                  |                          |                          |                          |
| 26 | Overweight                       | 1375 | 0.43 (0.36-0.49) | 0.08 (-0.01-0.16)        | 0.08 (-0.00-0.17)        | 0.07 (-0.02-0.15)        |
| 27 |                                  |      |                  |                          |                          |                          |
| 28 | Obese                            | 633  | 0.35 (0.24-0.46) | 0.12 (-0.01-0.26)        | 0.13 (-0.00-0.27)        | 0.11 (-0.02-0.25)        |
| 29 |                                  |      |                  |                          |                          |                          |
| 30 |                                  |      |                  |                          |                          |                          |
| 31 | English speaking country of      |      |                  |                          |                          |                          |
| 32 | birth                            | 3129 | 0.44 (0.40-0.48) | 0.06 (0.01-0.12)*        | 0.07 (0.01-0.13)*        | 0.06 (0.01-0.12)*        |
| 33 |                                  |      |                  |                          |                          |                          |
| 34 | Non-English speaking country     |      |                  |                          |                          |                          |
| 35 | of birth                         | 222  | 0.35 (0.18-0.52) | 0.17 (-0.04-0.38)        | 0.18 (-0.02-0.39)        | 0.17 (-0.03-0.38)        |
| 36 |                                  |      |                  |                          |                          |                          |
| 37 | Never smokers                    | 2121 | 0.44 (0.39-0.49) | 0.07 (0.00-0.14)*        | 0.07 (0.01-0.14)*        | 0.07 (0.00-0.14)*        |
| 38 |                                  |      |                  |                          |                          |                          |
| 39 |                                  |      |                  |                          |                          |                          |
| 40 |                                  |      |                  |                          |                          |                          |
| 41 |                                  |      |                  |                          |                          |                          |
| 42 |                                  |      |                  |                          |                          |                          |
| 43 |                                  |      |                  |                          |                          |                          |
| 44 |                                  |      |                  |                          |                          |                          |
| 45 |                                  |      |                  |                          |                          |                          |
| 46 |                                  |      |                  |                          |                          |                          |
| 47 |                                  |      |                  |                          |                          |                          |
| 48 |                                  |      |                  |                          |                          |                          |
| 49 |                                  |      |                  |                          |                          |                          |

|                                 |      |                  |                   |                   |                   |
|---------------------------------|------|------------------|-------------------|-------------------|-------------------|
| Ex smokers                      | 894  | 0.38 (0.30-0.46) | 0.04 (-0.06-0.14) | 0.04 (-0.06-0.14) | 0.03 (-0.08-0.13) |
| Current smokers                 | 336  | 0.56 (0.40-0.71) | 0.17 (-0.05-0.39) | 0.17 (-0.05-0.40) | 0.18 (-0.04-0.41) |
| Chronic disease <sup>1</sup>    | 1944 | 0.47 (0.41-0.52) | 0.06 (-0.01-0.13) | 0.07 (-0.01-0.14) | 0.07 (-0.01-0.14) |
| No chronic disease <sup>1</sup> | 1407 | 0.44 (0.39-0.49) | 0.08 (-0.00-0.17) | 0.09 (0.00-0.17)* | 0.1 (0.01-0.18)*  |

Model 1- adjusting for age and sex

Model 2- additionally adjusting for smoking status, education status, area-level disadvantage and ethnicity

Model 3- additionally adjusting for baseline BMI and diabetes status

\* indicates  $p < 0.05$

<sup>1</sup> Chronic disease refers to any of coronary heart disease, cholesterol, hypertension, or diabetes at baseline

Figure 1. Difference in annualised change in weight (kg/year) or waist circumference (cm/year) between Period 2 and Period 1, by age and sex. Adjusted for age.

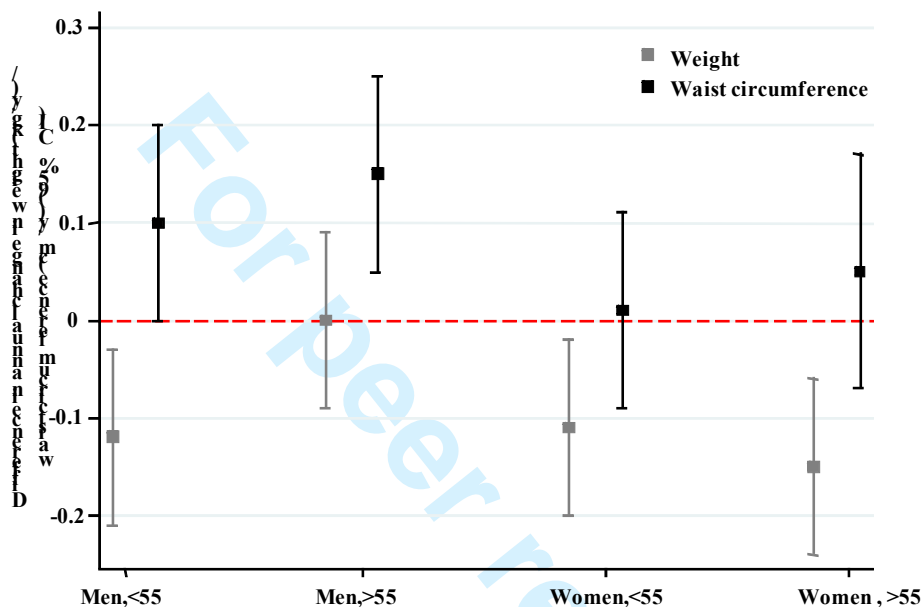

1  
2  
3  
4  
5  
6  
7  
8  
9  
10  
11  
12  
13  
14  
15  
16  
17  
18  
19  
20  
21  
22  
23  
24  
25  
26  
27  
28  
29  
30  
31  
32  
33  
34  
35  
36  
37  
38  
39  
40  
41  
42  
43  
44  
45  
46  
47  
48  
49  
50  
51  
52  
53  
54  
55  
56  
57  
58  
59  
60

Appendix

Figure 1 Annualised weight and waist circumference change in Period 1 and Period 2

A. Annualised weight change

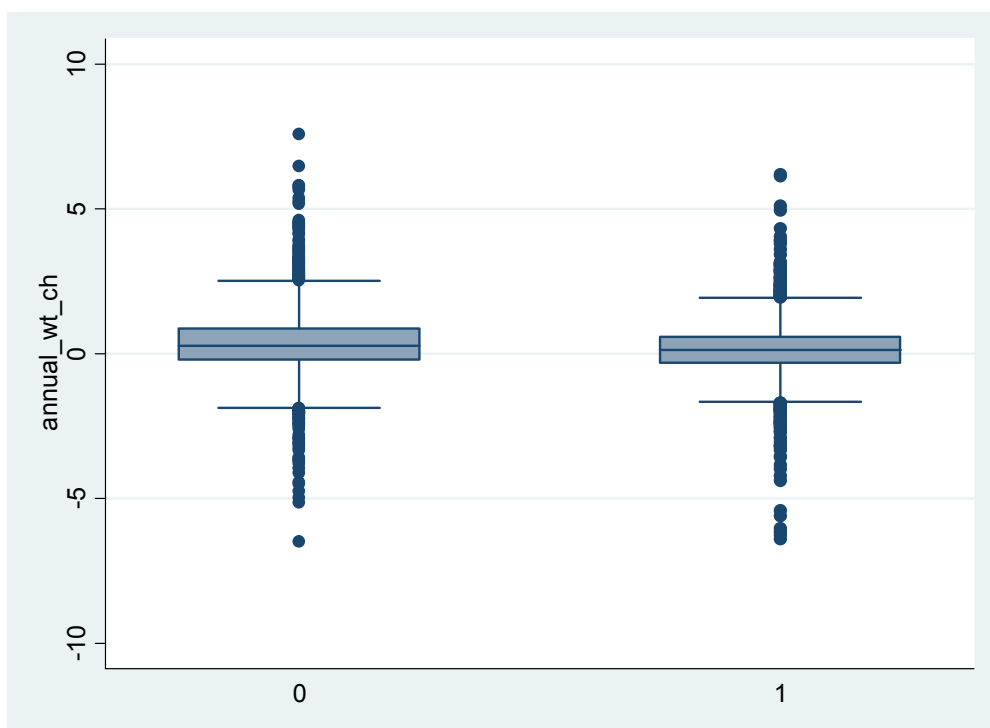

For peer review only

1  
2  
3  
4  
5  
6  
7  
8  
9  
10  
11  
12  
13  
14  
15  
16  
17  
18  
19  
20  
21  
22  
23  
24  
25  
26  
27  
28  
29  
30  
31  
32  
33  
34  
35  
36  
37  
38  
39  
40  
41  
42  
43  
44  
45  
46  
47  
48  
49  
50  
51  
52  
53  
54  
55  
56  
57  
58  
59  
60

B. Annualised waist circumference change

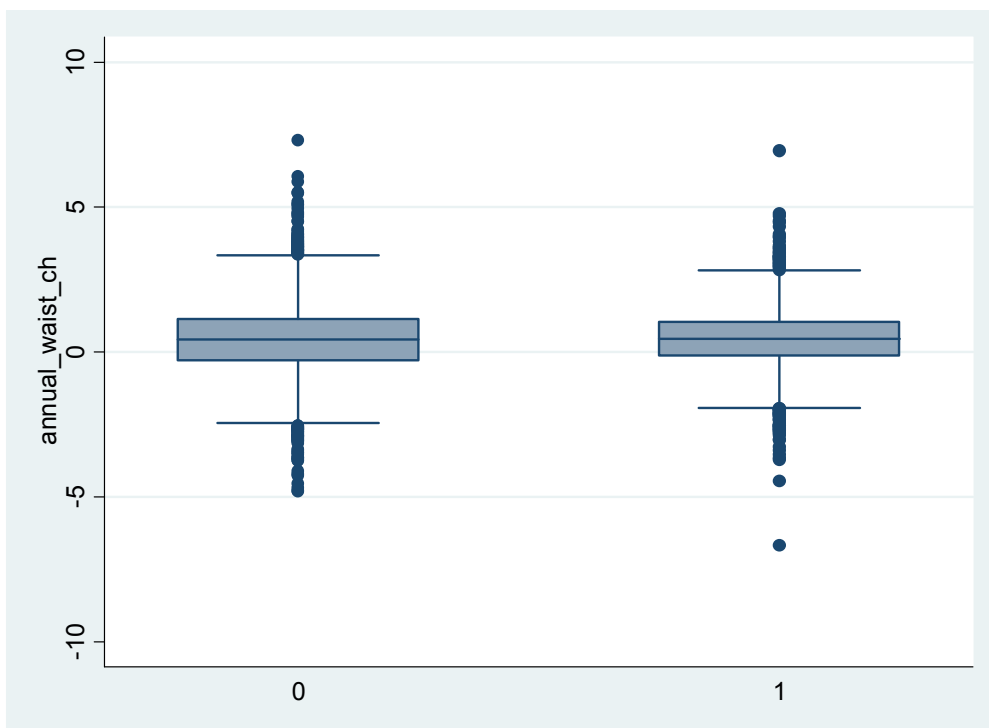

Review only

## Appendix

**Figure 1** Annual weight and waist circumference change in Period 1 and Period 2

### A. Annual weight change

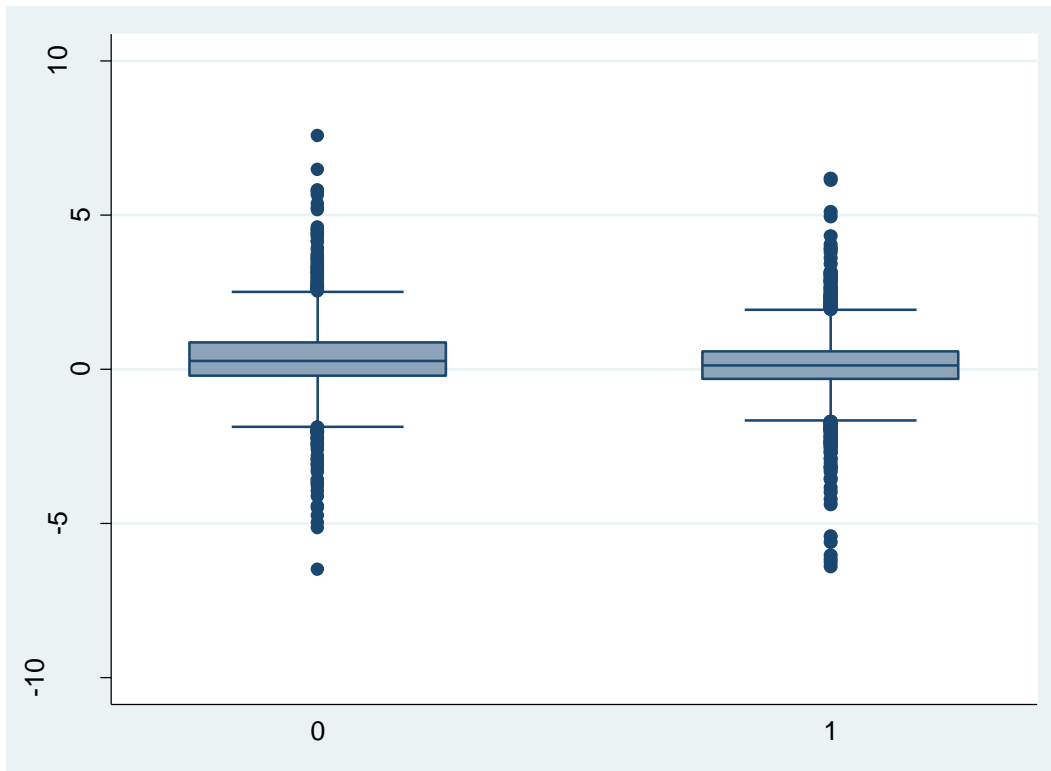

1  
2  
3  
4  
5  
6  
7  
8  
9  
10  
11  
12  
13  
14  
15  
16  
17  
18  
19  
20  
21  
22  
23  
24  
25  
26  
27  
28  
29  
30  
31  
32  
33  
34  
35  
36  
37  
38  
39  
40  
41  
42  
43  
44  
45  
46  
47  
48  
49  
50  
51  
52  
53  
54  
55  
56  
57  
58  
59  
60

B. Annual waist circumference change

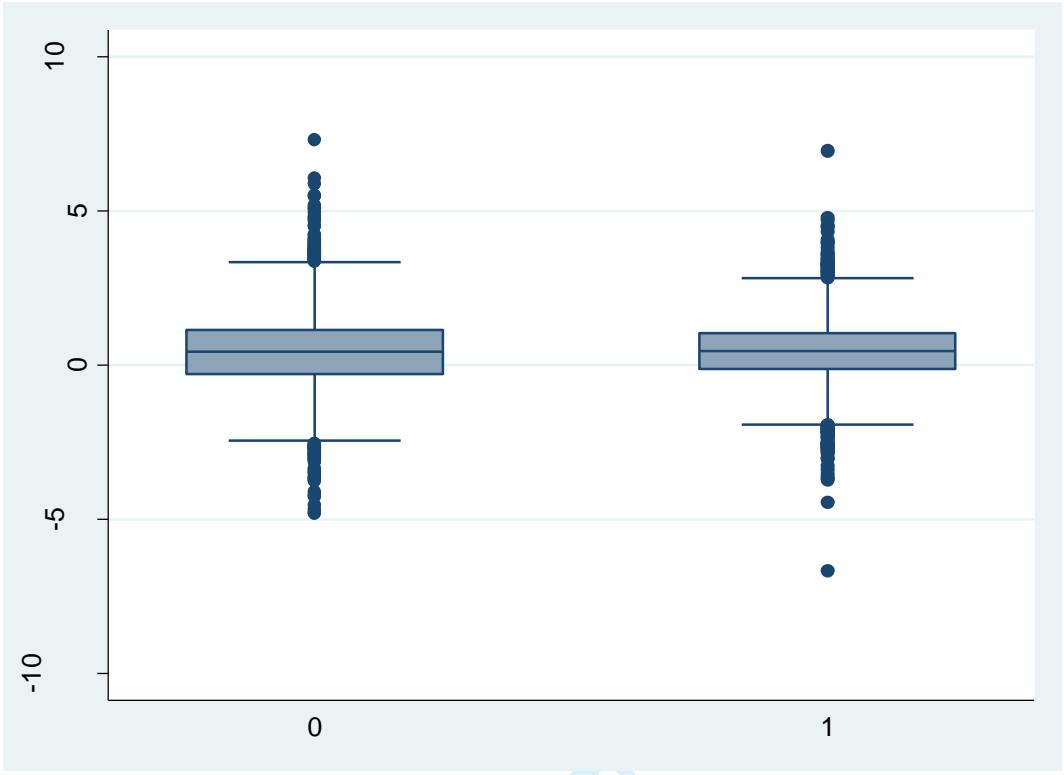

review only

**Table 1** Comparison of annual weight and waist circumference change between Period 1 and Period 2 for matching age groups.

| Sex   | Age group | Difference in annual weight change | Difference in annual WC change |
|-------|-----------|------------------------------------|--------------------------------|
| Men   | 25-34     | -0.08 (-0.5, 0.35)                 | -0.10 (-0.53, 0.32)            |
|       | 35-44     | -0.18 (-0.34, -0.02)*              | 0.12 (-0.06, 0.30)             |
|       | 45-54     | -0.10 (-0.22, 0.01)                | 0.13 (0.01, 0.26)              |
|       | 55-64     | -0.03 (-0.1, 0.16)                 | 0.20 (0.05, 0.34)              |
|       | 65-74     | -0.12 (-0.26, 0.02)                | 0.05 (-0.12, 0.23)             |
|       | 75+       | 0.27 (-0.10, 0.65)                 | 0.26 (-0.19, 0.72)             |
|       | Women     | 25-34                              | -0.08 (-0.46, 0.31)            |
| 35-44 |           | -0.12 (-0.26, 0.03)                | -0.02 (-0.19, 0.16)            |
| 45-54 |           | -0.15 (-0.26, -0.04)*              | -0.01 (-0.14, 0.12)            |
| 55-64 |           | -0.09 (-0.20, 0.02)                | 0.08 (-0.07, 0.23)             |
| 65-74 |           | -0.34 (-0.50, -0.17)*              | -0.08 (-0.31, 0.16)            |
| 75+   |           | 0.02 (-0.37, 0.41)                 | 0.27 (-0.32, .85)              |

\*Indicates a significant difference (p<0.05)



STROBE Statement—Checklist of items that should be included in reports of *cohort studies*

|                              | Item No | Recommendation                                                                                                                                                                               |
|------------------------------|---------|----------------------------------------------------------------------------------------------------------------------------------------------------------------------------------------------|
| <b>Title and abstract</b>    | 1       | (a) Indicate the study's design with a commonly used term in the title or the abstract YES                                                                                                   |
|                              |         | (b) Provide in the abstract an informative and balanced summary of what was done and what was found YES                                                                                      |
| <b>Introduction</b>          |         |                                                                                                                                                                                              |
| Background/rationale         | 2       | Explain the scientific background and rationale for the investigation being reported YES                                                                                                     |
| Objectives                   | 3       | State specific objectives, including any prespecified hypotheses YES                                                                                                                         |
| <b>Methods</b>               |         |                                                                                                                                                                                              |
| Study design                 | 4       | Present key elements of study design early in the paper YES                                                                                                                                  |
| Setting                      | 5       | Describe the setting, locations, and relevant dates, including periods of recruitment, exposure, follow-up, and data collection YES                                                          |
| Participants                 | 6       | (a) Give the eligibility criteria, and the sources and methods of selection of participants. Describe methods of follow-up YES,                                                              |
|                              |         | (b) For matched studies, give matching criteria and number of exposed and unexposed N/A                                                                                                      |
| Variables                    | 7       | Clearly define all outcomes, exposures, predictors, potential confounders, and effect modifiers. Give diagnostic criteria, if applicable YES                                                 |
| Data sources/<br>measurement | 8*      | For each variable of interest, give sources of data and details of methods of assessment (measurement). YES Describe comparability of assessment methods if there is more than one group N/A |
| Bias                         | 9       | Describe any efforts to address potential sources of bias YES                                                                                                                                |
| Study size                   | 10      | Explain how the study size was arrived at YES                                                                                                                                                |
| Quantitative variables       | 11      | Explain how quantitative variables were handled in the analyses. If applicable, describe which groupings were chosen and why YES                                                             |
| Statistical methods          | 12      | (a) Describe all statistical methods, including those used to control for confounding YES                                                                                                    |
|                              |         | (b) Describe any methods used to examine subgroups and interactions YES                                                                                                                      |
|                              |         | (c) Explain how missing data were addressed YES                                                                                                                                              |
|                              |         | (d) If applicable, explain how loss to follow-up was addressed YES                                                                                                                           |
|                              |         | (e) Describe any sensitivity analyses YES                                                                                                                                                    |

| <b>Results</b>           |     |                                                                                                                                                                                                                                                                                                                                                                                                                                   |
|--------------------------|-----|-----------------------------------------------------------------------------------------------------------------------------------------------------------------------------------------------------------------------------------------------------------------------------------------------------------------------------------------------------------------------------------------------------------------------------------|
| Participants             | 13* | (a) Report numbers of individuals at each stage of study—eg numbers potentially eligible, examined for eligibility, confirmed eligible, included in the study, completing follow-up, and analysed YES<br><br>(b) Give reasons for non-participation at each stage NOT DONE<br><br>(c) Consider use of a flow diagram NOT DONE                                                                                                     |
| Descriptive data         | 14* | (a) Give characteristics of study participants (eg demographic, clinical, social) and information on exposures and potential confounders YES<br><br>(b) Indicate number of participants with missing data for each variable of interest DONE IN AGGREGATE<br><br>(c) Summarise follow-up time (eg, average and total amount) YES                                                                                                  |
| Outcome data             | 15* | Report numbers of outcome events or summary measures over time YES                                                                                                                                                                                                                                                                                                                                                                |
| Main results             | 16  | (a) Give unadjusted estimates and, if applicable, confounder-adjusted estimates and their precision (eg, 95% confidence interval). Make clear which confounders were adjusted for and why they were included YES<br><br>(b) Report category boundaries when continuous variables were categorized N/A<br><br>(c) If relevant, consider translating estimates of relative risk into absolute risk for a meaningful time period N/A |
| Other analyses           | 17  | Report other analyses done—eg analyses of subgroups and interactions, and sensitivity analyses YES                                                                                                                                                                                                                                                                                                                                |
| <b>Discussion</b>        |     |                                                                                                                                                                                                                                                                                                                                                                                                                                   |
| Key results              | 18  | Summarise key results with reference to study objectives YES                                                                                                                                                                                                                                                                                                                                                                      |
| Limitations              | 19  | Discuss limitations of the study, taking into account sources of potential bias or imprecision. Discuss both direction and magnitude of any potential bias YES                                                                                                                                                                                                                                                                    |
| Interpretation           | 20  | Give a cautious overall interpretation of results considering objectives, limitations, multiplicity of analyses, results from similar studies, and other relevant evidence YES                                                                                                                                                                                                                                                    |
| Generalisability         | 21  | Discuss the generalisability (external validity) of the study results YES                                                                                                                                                                                                                                                                                                                                                         |
| <b>Other information</b> |     |                                                                                                                                                                                                                                                                                                                                                                                                                                   |
| Funding                  | 22  | Give the source of funding and the role of the funders for the present study and, if applicable, for the original study on which the present article is based YES                                                                                                                                                                                                                                                                 |

\*Give information separately for exposed and unexposed groups.

1  
2  
3  
4  
5  
6  
7  
8  
9  
10  
11  
12  
13  
14  
15  
16  
17  
18  
19  
20  
21  
22  
23  
24  
25  
26  
27  
28  
29  
30  
31  
32  
33  
34  
35  
36  
37  
38  
39  
40  
41  
42  
43  
44  
45  
46  
47  
48  
49  
50  
51  
52  
53  
54  
55  
56  
57  
58  
59  
60

**Note:** An Explanation and Elaboration article discusses each checklist item and gives methodological background and published examples of transparent reporting. The STROBE checklist is best used in conjunction with this article (freely available on the Web sites of PLoS Medicine at <http://www.plosmedicine.org/>, Annals of Internal Medicine at <http://www.annals.org/>, and Epidemiology at <http://www.epidem.com/>). Information on the STROBE Initiative is available at <http://www.strobe-statement.org>.

For peer review only
